# Supplementary material for: Transcriptomics Coupled to Proteomics Reveals Novel Targets for the Protective Role of Spermine in Diabetic Cardiomyopathy
Source: Hindawi journal article supplement (doi:10.1155/2022/5909378), 2022-01-01
Supplement: f1 [file 5909378.f1.zip]

*Supplemental file*

**Table SI. Biochemical parameters in CK, DbCM and SPM mouse (mean  $\pm$  SEM, n=10)**

| Group | Blood Glucose<br>Concentration (mmol/L) | Body Weight<br>(g) | Serum Insulin<br>(ng/mL) | Serum Triglyceride<br>Content (mmol/L) |
|-------|-----------------------------------------|--------------------|--------------------------|----------------------------------------|
| CK    | 5.5 $\pm$ 1.1                           | 22.4 $\pm$ 1.0     | 0.7 $\pm$ 0.1            | 1.0 $\pm$ 0.2                          |
| DbCM  | 26.1 $\pm$ 3.1*                         | 16.2 $\pm$ 2.2*    | 0.4 $\pm$ 0.1*           | 7.5 $\pm$ 1.2*                         |
| SPM   | 24.6 $\pm$ 5.8                          | 17.7 $\pm$ 1.6     | 0.4 $\pm$ 0.1            | 6.2 $\pm$ 0.7 <sup>#</sup>             |

\*P < 0.05 versus CK group; <sup>#</sup>P < 0.05 versus DbCM group.  
 CK, control check; DbCM, diabetic cardiomyopathy; SPM, spermine.

**Table SII. Heart function related indexes in CK, DbCM and SPM mouse (mean  $\pm$  SEM, n=10)**

| Group    | EF (%)                      | FS (%)                      | LVIDd (mm)                 | LVIDs (mm)                 |
|----------|-----------------------------|-----------------------------|----------------------------|----------------------------|
| CK-0W    | 78.2 $\pm$ 4.5              | 48.1 $\pm$ 3.2              | 2.4 $\pm$ 0.4              | 2.1 $\pm$ 0.3              |
| DbCM-0W  | 76.4 $\pm$ 4.8              | 47.6 $\pm$ 6.7              | 2.4 $\pm$ 0.3              | 2.1 $\pm$ 0.5              |
| SPM-0W   | 77.7 $\pm$ 4.7              | 49.4 $\pm$ 5.4              | 2.4 $\pm$ 0.5              | 2.0 $\pm$ 0.5              |
| CK-12W   | 75.0 $\pm$ 4.0              | 46.0 $\pm$ 5.1              | 2.7 $\pm$ 0.4              | 2.2 $\pm$ 0.3              |
| DbCM-12W | 48.6 $\pm$ 4.1*             | 27.2 $\pm$ 2.5*             | 4.4 $\pm$ 0.4*             | 3.3 $\pm$ 0.5*             |
| SPM-12W  | 68.1 $\pm$ 5.6 <sup>#</sup> | 33.7 $\pm$ 6.3 <sup>#</sup> | 3.2 $\pm$ 0.5 <sup>#</sup> | 2.9 $\pm$ 0.4 <sup>#</sup> |

\*P < 0.05 versus CK-12W group; <sup>#</sup>P < 0.05 versus DbCM-12W group.

CK, control check; DbCM, diabetic cardiomyopathy; SPM, spermine; EF, ejection fraction; FS, fractional shortening;  
 LVIDd, left ventricular internal dimension at end-diastole; LVIDs, left ventricular internal dimension at end-systole.

**Table SIII. Venn analysis identified 174 genes that differentially expressed in DbCM but reversal regulated by SPM.**

| Gene_ID           | CK-1            | CK-2            | CK-3            | DbCM-1          | DbCM-2          | DbCM-3          | SPM-1           | SPM-2           | SPM-3           | KEGG_ID | symbol | ncbi_description                                                                        |
|-------------------|-----------------|-----------------|-----------------|-----------------|-----------------|-----------------|-----------------|-----------------|-----------------|---------|--------|-----------------------------------------------------------------------------------------|
| ENSMUSG0000000682 | 22.7727<br>1731 | 15.5113<br>8441 | 12.9437<br>3218 | 8.42501<br>1863 | 2.73783<br>4646 | 6.902498<br>623 | 15.415<br>60521 | 12.1607<br>0637 | 10.6942<br>6228 | K06488  | Cd52   | CD52 antigen<br>spleen focus forming virus<br>(SFFV) proviral integration<br>oncogene   |
| ENSMUSG0000002111 | 10.2434<br>683  | 6.78369<br>4526 | 5.78577<br>1471 | 4.64179<br>0254 | 4.31206<br>922  | 4.009051<br>857 | 8.3791<br>84085 | 6.59395<br>1844 | 5.29561<br>7353 | K09438  | Spi1   | interferon regulatory factor<br>9                                                       |
| ENSMUSG0000002325 | 14.1068<br>9242 | 11.9535<br>8574 | 11.4235<br>8155 | 7.40540<br>3474 | 6.27634<br>8554 | 6.921892<br>999 | 9.0497<br>37664 | 8.75162<br>8539 | 8.95970<br>8244 | K04693  | Irf9   | Epstein-Barr virus induced<br>gene 3                                                    |
| ENSMUSG0000003206 | 1.53596<br>03   | 1.01976<br>1406 | 1.30369<br>5798 | 0.50179<br>6029 | 0.05671<br>8673 | 0.297524<br>819 | 1.4250<br>65103 | 0.92542<br>6546 | 0.71587<br>2017 | None    | Ebi3   | hemopoietic cell kinase                                                                 |
| ENSMUSG0000003283 | 3.37311<br>1559 | 3.17827<br>263  | 2.28530<br>3675 | 1.46826<br>1272 | 1.01684<br>2184 | 2.201972<br>842 | 3.1729<br>93036 | 2.89777<br>3747 | 2.73387<br>5116 | K08893  | Hck    | histone deacetylase 9<br>adhesion G protein-coupled<br>receptor E1                      |
| ENSMUSG0000004698 | 2.91471<br>1146 | 3.69048<br>3135 | 3.96643<br>1525 | 2.28623<br>019  | 2.12682<br>1674 | 2.526069<br>4   | 3.1858<br>67321 | 3.20034<br>5485 | 3.36945<br>3258 | K11409  | Hdac9  | POU domain, class 2,<br>transcription factor 2<br>polycystic kidney disease<br>2-like 2 |
| ENSMUSG0000004730 | 11.1443<br>4453 | 10.9939<br>2867 | 9.10670<br>5695 | 5.45840<br>129  | 4.54817<br>899  | 5.354803<br>545 | 15.615<br>09346 | 11.2719<br>2598 | 6.95724<br>4046 | K04591  | Adgre1 | cytochrome b-245, beta<br>polypeptide                                                   |
| ENSMUSG0000008496 | 0.27810<br>5477 | 0.44783<br>2641 | 0.16492<br>4511 | 0.21646<br>2479 | 0.05535<br>167  | 0.064523<br>118 | 0.2823<br>58085 | 0.30989<br>494  | 0.23287<br>2814 | K09364  | Pou2f2 | CD48 antigen                                                                            |
| ENSMUSG0000014503 | 5.96571<br>9592 | 8.40403<br>9797 | 8.32757<br>2486 | 5.07428<br>9674 | 4.96019<br>8954 | 5.231770<br>233 | 6.5486<br>98198 | 6.66235<br>4446 | 6.98479<br>2332 | K04991  | Pkd2l2 |                                                                                         |
| ENSMUSG0000015340 | 5.89059<br>2169 | 6.34587<br>9518 | 4.96000<br>6503 | 3.95775<br>9163 | 2.64457<br>9766 | 3.522306<br>925 | 7.1542<br>12855 | 6.04802<br>4013 | 5.09502<br>5787 | K08008  | Cybb   |                                                                                         |
| ENSMUSG0000015355 | 5.10391<br>9495 | 5.33332<br>6357 | 4.00288<br>5948 | 3.22674<br>0886 | 2.37309<br>7821 | 2.098854<br>468 | 6.0758<br>93855 | 5.05845<br>0715 | 3.88464<br>3421 | K06479  | Cd48   |                                                                                         |

|           |         |         |         |         |         |          |        |         |         |        |         |                                |
|-----------|---------|---------|---------|---------|---------|----------|--------|---------|---------|--------|---------|--------------------------------|
| ENSMUSG00 | 0.64753 | 0.81637 | 0.73386 | 0.35974 | 0.35579 | 0.388089 | 0.5758 | 0.50734 | 0.57243 |        |         | calcium channel,               |
| 000015968 | 6622    | 9296    | 8456    | 6915    | 8388    | 468      | 42305  | 8338    | 9896    | K04851 | Cacna1d | voltage-dependent, L type,     |
| ENSMUSG00 | 0.70322 | 0.75922 | 0.43138 | 0.36697 | 0.32061 | 0.252961 | 0.5501 | 0.64546 | 0.56942 |        |         | alpha 1D subunit               |
| 000016984 | 9595    | 8814    | 78      | 7608    | 9751    | 265      | 39828  | 3716    | 1221    | None   | Etaa1   | Ewing tumor-associated         |
| ENSMUSG00 | 0.05366 | 0.04046 | 0.04598 |         |         |          | 0.3495 | 0.18002 |         |        |         | antigen 1                      |
| 000017950 | 8852    | 7836    | 7008    | 0       | 0       | 0        | 92687  | 1009    | 0       | K07292 | Hnf4a   | hepatic nuclear factor 4,      |
| ENSMUSG00 | 1.71006 | 1.47584 | 1.06196 | 1.07281 | 0.49441 | 0.581882 | 1.2219 | 1.10723 | 1.19389 |        |         | alpha                          |
| 000018654 | 1508    | 9349    | 7641    | 7252    | 8094    | 018      | 63278  | 0671    | 8625    | K09220 | Ikzf1   | IKAROS family zinc finger 1    |
| ENSMUSG00 | 0.13882 | 0.47629 | 0.06939 | 0.02090 | 0.01358 | 0.023754 | 0.3847 | 0.16950 | 0.14508 |        |         | arachidonate                   |
| 000018924 | 6741    | 0804    | 0939    | 2508    | 517     | 23       | 71342  | 2223    | 5407    | K00460 | Alox15  | 15-lipoxygenase                |
| ENSMUSG00 | 2.22816 | 2.01520 | 1.87794 | 1.09209 | 0.94467 | 1.236622 | 1.7495 | 1.67611 | 1.45755 |        |         |                                |
| 000020143 | 595     | 2242    | 0335    | 3237    | 6986    | 83       | 19634  | 8344    | 4847    | K12367 | Dock2   | dedicator of cyto-kinesis 2    |
| ENSMUSG00 | 1.63154 | 1.52091 | 1.38603 | 0.95279 | 0.81800 | 1.085657 | 1.0445 | 1.29272 | 1.53733 |        |         |                                |
| 000020181 | 7273    | 5482    | 1419    | 6177    | 2608    | 97       | 05019  | 5049    | 4409    | None   | Nav3    | neuron navigator 3             |
| ENSMUSG00 | 1.88611 | 1.27536 | 1.29452 | 1.13381 | 0.74378 | 0.842945 | 1.7366 | 1.39468 | 1.13668 |        |         |                                |
| 000020437 | 5533    | 7006    | 652     | 5878    | 8059    | 247      | 42698  | 0947    | 5543    | K10356 | Myo1g   | myosin IG                      |
| ENSMUSG00 | 2.38334 | 2.90515 | 2.63929 | 1.73319 | 1.62685 | 2.293428 | 2.5135 | 2.70812 | 2.66243 |        |         | ATP-binding cassette,          |
| 000020620 | 0765    | 2288    | 3671    | 1828    | 4766    | 83       | 23522  | 9064    | 3512    | K05650 | Abca8b  | sub-family A (ABC1),           |
|           |         |         |         |         |         |          |        |         |         |        |         | member 8b                      |
| ENSMUSG00 | 0.09560 | 0.37006 | 0.19115 | 0.05758 |         | 0.016359 | 1.2992 | 0.75427 | 0.05450 |        |         | solute carrier family 10       |
| 000021135 | 7095    | 4359    | 2398    | 0492    | 0       | 045      | 76572  | 259     | 035     | K14341 | Slc10a1 | (sodium/bile acid              |
| ENSMUSG00 | 3.74053 | 4.75418 | 3.44616 | 2.55014 | 2.40120 | 2.611328 | 3.6599 | 3.29389 | 2.99086 |        |         | cotransporter family),         |
| 000021219 | 3509    | 1326    | 1663    | 7067    | 5545    | 695      | 70028  | 7369    | 7639    | K16449 | Rgs6    | member 1                       |
| ENSMUSG00 | 4.52307 | 3.93510 | 2.92721 | 1.94174 | 1.08519 | 1.577709 | 3.3197 | 2.43416 | 1.91778 |        |         | regulator of G-protein         |
| 000021423 | 7647    | 5009    | 6952    | 8718    | 8972    | 23       | 97375  | 3064    | 691     | None   | Ly86    | signaling 6                    |
| ENSMUSG00 | 15.9772 | 15.0355 | 10.4971 | 8.71791 | 6.44990 | 8.194003 | 17.157 | 14.0490 | 10.6215 |        |         | lymphocyte antigen 86          |
| 000021998 | 3751    | 8678    | 78      | 2925    | 6971    | 413      | 1484   | 739     | 6628    | K17276 | Lcp1    | lymphocyte cytosolic protein   |
| ENSMUSG00 | 3.34433 | 2.06098 | 2.37782 | 1.23865 | 1.20756 | 1.300544 | 2.7022 | 2.11640 | 1.56319 | None   | Epsti1  | 1                              |
|           |         |         |         |         |         |          |        |         |         |        |         | epithelial stromal interaction |

|           |         |         |         |         |         |          |        |         |         |        |          |                               |
|-----------|---------|---------|---------|---------|---------|----------|--------|---------|---------|--------|----------|-------------------------------|
| 000022014 | 6199    | 1427    | 3393    | 8006    | 179     | 095      | 33805  | 0148    | 8278    |        |          | 1 (breast)                    |
| ENSMUSG00 | 0.95230 | 1.02512 | 0.77662 | 0.49052 | 0.40463 | 0.503845 | 1.9268 | 1.75350 | 1.01190 |        |          |                               |
| 000022148 | 2552    | 9577    | 7342    | 3663    | 8539    | 109      | 93438  | 3105    | 1405    | K17698 | Fyb      | FYN binding protein           |
| ENSMUSG00 | 5.61409 | 5.40429 | 3.97145 | 2.56208 | 2.38632 | 2.722493 | 4.1927 | 3.78154 | 3.36704 |        |          |                               |
| 000022488 | 0014    | 6251    | 5288    | 969     | 0023    | 148      | 72401  | 0361    | 5168    | K05750 | Nckap1l  | NCK associated protein 1 like |
| ENSMUSG00 | 1.31768 | 0.97427 | 1.12330 | 0.33472 | 0.71196 | 0.753856 | 1.2142 | 1.57164 | 2.25034 |        |          |                               |
| 000022523 | 6247    | 0237    | 797     | 0539    | 5365    | 597      | 31752  | 2156    | 9361    | K04358 | Fgf12    | fibroblast growth factor 12   |
| ENSMUSG00 | 1.96871 | 2.02596 | 1.51009 | 1.10924 | 0.76333 | 1.207613 | 1.5498 | 1.67458 | 1.50575 |        | Tmem45   |                               |
| 000022754 | 3275    | 8782    | 687     | 5231    | 9689    | 695      | 20054  | 3288    | 125     | None   | a        | transmembrane protein 45a     |
| ENSMUSG00 | 13.7522 | 11.9227 | 10.1657 | 9.31651 | 6.96415 | 7.209762 | 12.799 | 10.4232 | 9.88200 |        |          | hematopoietic cell specific   |
| 000022831 | 555     | 3573    | 5193    | 5114    | 8435    | 306      | 64995  | 8073    | 024     | K06106 | Hcls1    | Lyn substrate 1               |
| ENSMUSG00 | 3.25444 | 3.24966 | 2.81392 | 2.17341 | 1.55382 | 2.189261 | 2.5635 | 2.82856 | 2.69300 |        |          | StAR-related lipid transfer   |
| 000024378 | 5272    | 1688    | 3066    | 7883    | 6811    | 985      | 66738  | 9777    | 3763    | None   | Stard4   | (START) domain containing 4   |
| ENSMUSG00 | 6.26824 | 5.11069 | 3.74444 | 2.90615 | 1.30906 | 1.994663 | 6.1509 | 3.69741 | 2.68714 |        |          | allograft inflammatory factor |
| 000024397 | 1562    | 4533    | 61      | 3262    | 6984    | 058      | 51132  | 3447    | 7548    | K18617 | Aif1     | 1                             |
| ENSMUSG00 | 1.92013 | 2.29018 | 2.62608 | 1.56081 | 1.40635 | 1.511727 | 2.3697 | 2.75488 | 2.49578 |        |          |                               |
| 000024766 | 667     | 8714    | 6526    | 8732    | 9388    | 902      | 0863   | 0718    | 5847    | None   | Lipo3    | lipase, member O3             |
| ENSMUSG00 | 3.63208 | 3.07139 | 2.48027 | 2.28182 | 1.33910 | 1.761578 | 4.9395 | 3.44729 | 2.74602 |        |          | phosphoinositide-3-kinase     |
| 000025017 | 9792    | 2665    | 3639    | 2436    | 2938    | 274      | 78347  | 9753    | 5672    | K12230 | Pik3ap1  | adaptor protein 1             |
| ENSMUSG00 | 0.36634 | 0.16113 | 0.16198 | 0.02651 | 0.04825 | 0.036164 | 0.1952 | 0.13895 | 0.06693 |        |          |                               |
| 000025279 | 8183    | 8199    | 6255    | 8928    | 9263    | 277      | 63148  | 3314    | 4283    | K11995 | Dnase1l3 | deoxyribonuclease 1-like 3    |
| ENSMUSG00 | 6.23938 | 3.74676 | 4.10848 | 2.73228 | 2.52232 | 3.110600 | 3.3899 | 3.84165 | 4.50913 |        |          | signal transducer and         |
| 000026104 | 4756    | 6931    | 5144    | 156     | 3785    | 515      | 95501  | 0434    | 9529    | K11220 | Stat1    | activator of transcription 1  |
| ENSMUSG00 | 3.39450 | 4.74215 | 4.10837 | 3.19836 | 2.12049 | 2.547953 | 3.8747 | 4.04029 | 3.85381 |        |          | CD55 molecule, decay          |
| 000026399 | 658     | 0929    | 3275    | 3866    | 6312    | 928      | 48005  | 8907    | 665     | K04006 | Cd55     | accelerating factor for       |
| ENSMUSG00 | 8.99124 | 7.14776 | 6.87493 | 3.95009 | 2.54236 | 2.789285 | 8.0159 | 4.47348 | 4.06548 |        |          | complement                    |
| 000026548 | 6599    | 6323    | 5039    | 6336    | 1622    | 737      | 64072  | 2319    | 5371    | None   | Slamf9   | SLAM family member 9          |
| ENSMUSG00 | 2.37221 | 2.89898 | 2.42645 | 1.79507 | 1.93248 | 1.694749 | 2.3614 | 2.30263 | 2.64296 |        |          | interferon induced with       |
| 000026896 | 6536    | 4063    | 7792    | 4485    | 9195    | 234      | 2548   | 9185    | 8076    | K12647 | Ifih1    | helicase C domain 1           |
| ENSMUSG00 | 3.36685 | 3.27504 | 2.63293 | 2.09710 | 2.04445 | 2.029313 | 3.8341 | 3.21133 | 2.57194 | K06548 | Siglec1  | sialic acid binding Ig-like   |

|           |         |         |         |         |         |          |        |         |         |        |         |                              |
|-----------|---------|---------|---------|---------|---------|----------|--------|---------|---------|--------|---------|------------------------------|
| 000027322 | 1693    | 3506    | 7983    | 3714    | 6422    | 051      | 12133  | 1282    | 3797    |        |         | lectin 1, sialoadhesin       |
| ENSMUSG00 | 2.62517 | 1.43340 | 1.17642 | 0.88592 | 0.64961 | 0.894930 | 1.2859 | 1.62482 | 1.72008 |        |         |                              |
| 000027514 | 819     | 1168    | 3721    | 9994    | 2188    | 794      | 44462  | 1443    | 0223    | K12965 | Zbp1    | Z-DNA binding protein 1      |
| ENSMUSG00 | 3.45085 | 3.26998 | 2.54016 | 2.31388 | 1.53100 | 1.765702 | 3.5317 | 3.09515 | 2.53008 |        |         |                              |
| 000027995 | 7857    | 6412    | 4225    | 4699    | 8998    | 202      | 06256  | 2459    | 9246    | K10159 | Tlr2    | toll-like receptor 2         |
| ENSMUSG00 | 6.02748 | 5.97802 | 5.57487 | 4.23598 | 4.72192 | 2.799773 | 5.3441 | 5.62966 | 6.21831 |        |         | secreted frizzled-related    |
| 000027996 | 5612    | 6679    | 4285    | 2378    | 1598    | 409      | 65536  | 2299    | 853     | K02176 | Sfrp2   | protein 2                    |
| ENSMUSG00 | 11.1851 | 7.76638 | 6.20783 | 4.03659 | 3.24582 | 4.149909 | 4.9276 | 6.53498 | 8.19813 |        |         |                              |
| 000028268 | 9601    | 4237    | 4499    | 2187    | 2313    | 16       | 66647  | 0111    | 6932    | None   | Gbp3    | guanylate binding protein 3  |
| ENSMUSG00 | 22.1715 | 13.9266 | 13.0886 | 10.0368 | 7.19310 | 8.676841 | 11.064 | 12.8461 | 14.6113 |        |         |                              |
| 000028270 | 1344    | 132     | 5904    | 0507    | 4553    | 488      | 11978  | 6757    | 5758    | None   | Gbp2    | guanylate binding protein 2  |
| ENSMUSG00 | 25.7385 | 21.0580 | 16.1762 | 14.2637 | 10.2837 | 12.19310 | 18.791 | 16.6473 | 14.2859 |        |         | lysosomal-associated protein |
| 000028581 | 259     | 142     | 1289    | 7869    | 2813    | 11       | 28714  | 3482    | 462     | K12387 | Laptm5  | transmembrane 5              |
|           |         |         |         |         |         |          |        |         |         |        |         | sema domain,                 |
|           |         |         |         |         |         |          |        |         |         |        |         | immunoglobulin domain (Ig),  |
| ENSMUSG00 | 1.81499 | 2.42176 | 2.27713 | 1.69192 | 1.07281 | 0.932715 | 1.6172 | 1.88197 | 2.23937 |        |         | short basic domain,          |
| 000028780 | 2146    | 1552    | 9933    | 1135    | 0313    | 835      | 71116  | 2612    | 7799    | K06840 | Sema3c  | secreted, (semaphorin) 3C    |
| ENSMUSG00 | 2.75962 | 2.16324 | 1.52959 | 1.00790 | 0.58822 | 1.215541 | 3.5421 | 4.02890 | 4.36109 |        |         |                              |
| 000029322 | 3825    | 3865    | 3995    | 5594    | 4544    | 213      | 29289  | 5485    | 6644    | None   | Plac8   | placenta-specific 8          |
| ENSMUSG00 | 1.23316 | 14.6088 | 0.54241 | 0.17329 | 0.14480 | 0.126601 | 118.20 | 54.3113 | 0.14059 |        |         |                              |
| 000029368 | 2315    | 0911    | 6075    | 3503    | 8295    | 638      | 52969  | 0828    | 1611    | K16141 | Alb     | albumin                      |
| ENSMUSG00 | 8.66126 | 12.8251 | 12.7610 | 8.13347 | 6.72283 | 8.515698 | 9.4667 | 10.1789 | 10.8784 |        |         |                              |
| 000029469 | 392     | 7624    | 3604    | 3908    | 5529    | 219      | 88725  | 9078    | 5463    | K19677 | Ift81   | intraflagellar transport 81  |
| ENSMUSG00 | 9.46890 | 11.0827 | 9.37185 | 6.73410 | 7.47850 | 7.262154 | 8.9341 | 9.59962 | 9.65971 |        |         |                              |
| 000029669 | 3697    | 5877    | 6634    | 7969    | 516     | 659      | 12421  | 2487    | 6474    | K17355 | Tspan12 | tetraspanin 12               |
| ENSMUSG00 | 5.93388 | 6.05524 | 5.94382 | 3.83284 | 4.00663 | 4.233921 | 5.9843 | 6.35334 | 5.85186 |        |         |                              |
| 000030245 | 254     | 0455    | 8882    | 7116    | 6884    | 764      | 35588  | 8987    | 3889    | None   | Golt1b  | golgi transport 1B           |
| ENSMUSG00 | 1.79063 | 1.70251 | 1.64540 | 1.04847 | 0.70798 | 0.866560 | 3.4121 | 2.24236 | 1.34037 |        |         | sialic acid binding Ig-like  |
| 000030474 | 9717    | 621     | 9657    | 724     | 6471    | 479      | 12712  | 2721    | 2591    | None   | Siglece | lectin E                     |
| ENSMUSG00 | 16.7009 | 17.5332 | 17.4534 | 11.0872 | 10.5192 | 11.43590 | 19.797 | 15.7342 | 14.0712 |        |         |                              |
| 000030560 | 0872    | 9307    | 5468    | 9371    | 8827    | 233      | 44537  | 9688    | 1182    | K01275 | Ctsc    | cathepsin C                  |

|           |         |         |         |         |         |          |        |         |         |        |         |                              |
|-----------|---------|---------|---------|---------|---------|----------|--------|---------|---------|--------|---------|------------------------------|
| ENSMUSG00 | 38.5971 | 41.0008 | 32.7605 | 23.7853 | 16.6648 | 21.85436 | 37.513 | 27.2536 | 24.2693 |        |         | TYRO protein tyrosine kinase |
| 000030579 | 1292    | 9946    | 4332    | 7298    | 3933    | 912      | 30354  | 2484    | 6194    | K07992 | Tyrobp  | binding protein              |
| ENSMUSG00 | 3.81348 | 4.87604 | 4.07822 | 2.71065 | 2.39526 | 3.459840 | 4.0279 | 4.01475 | 3.92642 |        |         | tripartite motif-containing  |
| 000030921 | 3335    | 6897    | 1972    | 7798    | 974     | 457      | 58659  | 78      | 4323    | None   | Trim30a | 30A                          |
| ENSMUSG00 | 0.61057 | 0.62586 | 0.35030 | 0.39170 | 0.14547 | 0.240742 | 0.5079 | 0.47870 | 0.47920 |        |         | Rho GTPase activating        |
| 000031389 | 0984    | 0552    | 1412    | 5492    | 4978    | 088      | 13778  | 5558    | 3348    | K20122 | Arhgap4 | protein 4                    |
|           |         |         |         |         |         |          |        |         |         |        |         | procollagen lysine,          |
| ENSMUSG00 | 5.43237 | 6.62615 | 6.69016 | 4.54328 | 3.76137 | 4.561668 | 5.8037 | 6.42264 | 6.56639 |        |         | 2-oxoglutarate               |
| 000032374 | 7938    | 2378    | 1732    | 2417    | 8653    | 178      | 74188  | 2426    | 2034    | K13645 | Plod2   | 5-dioxygenase 2              |
| ENSMUSG00 | 0.58437 | 0.41294 | 0.27772 | 0.12260 | 0.04687 | 0.122938 | 0.4453 | 0.51285 | 0.45508 |        |         | adhesion G protein-coupled   |
| 000032915 | 2696    | 3486    | 6749    | 3895    | 2923    | 857      | 80624  | 4123    | 0265    | K08445 | Adgre4  | receptor E4                  |
| ENSMUSG00 | 6.21971 | 5.37464 | 3.88469 | 4.06081 | 2.59615 | 3.032605 | 6.2596 | 4.78698 | 3.82790 |        |         | RAS-related C3 botulinum     |
| 000033220 | 6763    | 2755    | 1155    | 7796    | 8189    | 126      | 08487  | 4996    | 5105    | K07860 | Rac2    | substrate 2                  |
| ENSMUSG00 | 12.2511 | 10.0493 | 8.11085 | 6.58206 | 4.94685 | 5.063656 | 7.2217 | 7.80605 | 8.54591 |        |         | receptor transporter protein |
| 000033355 | 7241    | 6741    | 641     | 3573    | 076     | 892      | 88674  | 1829    | 2889    | None   | Rtp4    | 4                            |
| ENSMUSG00 | 0.20047 | 0.20977 | 0.49153 | 0.07466 | 0.06195 | 0.160680 | 0.1660 | 0.26558 | 0.31877 |        |         | Fraser extracellular matrix  |
| 000034687 | 4469    | 2411    | 112     | 698     | 105     | 549      | 29796  | 2332    | 9591    | None   | Fras1   | complex subunit 1            |
| ENSMUSG00 | 0.72299 | 0.91026 | 0.79569 | 0.45690 | 0.44786 | 0.547611 | 0.6434 | 0.68526 | 0.67429 |        |         | immunoglobulin               |
| 000036334 | 2157    | 1441    | 7449    | 2407    | 6035    | 09       | 3506   | 5217    | 3205    | None   | Igsf10  | superfamily, member 10       |
| ENSMUSG00 | 39.9052 | 39.4431 | 43.8255 | 27.4191 | 26.5369 | 28.50677 | 35.286 | 36.9016 | 37.7572 |        |         |                              |
| 000036446 | 5343    | 4646    | 9938    | 4604    | 4816    | 903      | 93626  | 9483    | 3255    | K08122 | Lum     | lumican                      |
| ENSMUSG00 | 3.96158 | 4.17144 | 5.32040 | 2.66607 | 2.62361 | 3.089716 | 4.2663 | 4.22809 | 4.25803 |        |         | family with sequence         |
| 000036501 | 2815    | 3389    | 6514    | 3257    | 6151    | 185      | 82871  | 7386    | 7525    | None   | Fam13b  | similarity 13, member B      |
| ENSMUSG00 | 4.64883 | 3.65959 | 3.02945 | 2.62482 | 1.84944 | 2.044375 | 3.5057 | 3.26444 | 2.71402 |        |         | thymocyte selection          |
| 000037731 | 3691    | 8779    | 1996    | 6105    | 5073    | 908      | 04754  | 3333    | 5393    | None   | Themis2 | associated family member 2   |
| ENSMUSG00 | 17.0072 | 15.2567 | 13.1060 | 11.4630 | 10.1746 | 10.64865 | 16.617 | 13.9302 | 11.7854 |        |         | signal-regulatory protein    |
| 000037902 | 3457    | 9073    | 3152    | 9104    | 919     | 386      | 2052   | 3004    | 7488    | K06551 | Sirpa   | alpha                        |
| ENSMUSG00 | 32.0858 | 29.3332 | 26.3759 | 19.6028 | 14.9262 | 14.04203 | 35.968 | 28.9992 | 20.0959 |        |         |                              |
| 000038642 | 8236    | 6751    | 415     | 1122    | 6192    | 699      | 8153   | 5622    | 8851    | K01368 | Ctss    | cathepsin S                  |
| ENSMUSG00 | 3.31318 | 3.08068 | 3.41591 | 2.36634 | 2.21687 | 2.220799 | 2.7765 | 3.23586 | 3.21952 |        |         | lysophosphatidic acid        |
| 000038668 | 6582    | 3952    | 44      | 6153    | 8889    | 26       | 31278  | 6209    | 0118    | K04289 | Lpar1   | receptor 1                   |

|                   |             |             |             |             |             |             |             |             |             |        |               |                                                           |
|-------------------|-------------|-------------|-------------|-------------|-------------|-------------|-------------|-------------|-------------|--------|---------------|-----------------------------------------------------------|
| ENSMUSG0000039031 | 6.641040111 | 8.597990788 | 7.948358608 | 5.399519604 | 4.490841955 | 5.140907254 | 5.609918645 | 6.727655813 | 7.388626349 | None   | Arhgap18      | Rho GTPase activating protein 18                          |
| ENSMUSG0000039145 | 1.753350636 | 1.660744873 | 1.771992617 | 1.17893205  | 1.099977285 | 1.426077797 | 1.511772598 | 1.615168561 | 1.834678118 | K08794 | Camk1d        | calcium/calmodulin-dependent protein kinase ID            |
| ENSMUSG0000039232 | 1.322347167 | 1.649726162 | 1.345954745 | 0.935165565 | 0.737193245 | 0.932477338 | 0.974469719 | 1.377436382 | 1.538051338 | K08487 | Stx11         | syntaxin 11                                               |
| ENSMUSG0000040653 | 36.91932472 | 44.36063429 | 41.60864727 | 30.68966541 | 26.51148267 | 29.7599475  | 42.45704922 | 41.8640845  | 41.42601393 | K17556 | Ppp1r14c      | protein phosphatase 1, regulatory (inhibitor) subunit 14c |
| ENSMUSG0000040747 | 7.180147753 | 6.367040151 | 5.738423528 | 4.205813701 | 2.686518064 | 4.352567208 | 8.685207341 | 7.55500432  | 5.271297641 | K06489 | Cd53          | CD53 antigen                                              |
| ENSMUSG0000042302 | 10.10723881 | 14.08037683 | 13.35712045 | 8.75160154  | 8.301653486 | 9.849185902 | 12.91775585 | 13.11553873 | 12.90216404 | None   | Ehbp1         | EH domain binding protein 1                               |
| ENSMUSG0000043629 | 0.394964176 | 0.492894015 | 0.560116952 | 0.221276092 | 0.143814005 | 0.227889902 | 0.459880688 | 0.362324295 | 0.44505875  | None   | 1700019D03Rik | RIKEN cDNA 1700019D03 gene                                |
| ENSMUSG0000044768 | 0.153227549 | 0.135522851 | 0.125026394 | 0.093530154 | 0.070514158 | 0.094952796 | 0.119222685 | 0.135354684 | 0.150299111 | None   | D1Ertd622e    | DNA segment, Chr 1, ERATO Doi 622, expressed              |
| ENSMUSG0000044811 | 4.462615023 | 4.064317515 | 3.910086826 | 2.312179929 | 1.207341999 | 2.021253775 | 3.872508153 | 3.007871283 | 2.494011312 | K06719 | Cd300c2       | CD300C molecule 2                                         |
| ENSMUSG0000044951 | 25.04500202 | 25.99278652 | 25.46899321 | 16.54519018 | 15.76707856 | 18.61755369 | 30.53914912 | 26.5330765  | 22.46003354 | K00907 | Mylk4         | myosin light chain kinase family, member 4                |
| ENSMUSG0000045868 | 0.308250866 | 0.251565683 | 0.207909278 | 0.123019555 | 0.090856953 | 0.162044473 | 0.185943985 | 0.345318879 | 0.328145973 | None   | Gvin1         | GTPase, very large interferon inducible 1                 |
| ENSMUSG0000046879 | 5.725168442 | 4.046033775 | 3.734116209 | 2.194452373 | 2.263196443 | 3.210633388 | 4.018459108 | 3.745929025 | 3.946837986 | K14139 | Irgm1         | immunity-related GTPase family M member 1                 |
| ENSMUSG0000048865 | 2.899713468 | 3.231111067 | 2.28570185  | 1.906973635 | 1.330723863 | 1.534108024 | 2.753440519 | 2.335251047 | 1.709966138 | None   | Arhgap30      | Rho GTPase activating protein 30                          |
| ENSMUSG0000051457 | 2.046094015 | 1.241885764 | 0.839609971 | 0.827352298 | 0.620783836 | 0.74148039  | 2.819893477 | 2.240579092 | 1.536478879 | K06477 | Spn           | sialophorin                                               |
| ENSMUSG0000052336 | 4.704252121 | 3.04481509  | 2.009078501 | 0.93020113  | 0.77209604  | 0.815119558 | 1.523971651 | 1.489059424 | 1.414364751 | K04192 | Cx3cr1        | chemokine (C-X3-C motif) receptor 1                       |



|           |         |         |         |         |         |          |        |         |         |        |         |                                |
|-----------|---------|---------|---------|---------|---------|----------|--------|---------|---------|--------|---------|--------------------------------|
| ENSMUSG00 | 2.99462 | 3.02334 | 2.75256 | 1.69461 | 1.39639 | 1.796845 | 3.0727 | 2.54829 | 2.18635 |        |         |                                |
| 000052889 | 7967    | 1305    | 0073    | 0503    | 0563    | 478      | 03202  | 2589    | 1636    | K19662 | Prkcb   | protein kinase C, beta         |
| ENSMUSG00 | 2.37920 | 2.32048 | 1.98547 | 1.24600 | 1.10337 | 0.796497 | 2.4786 | 1.99166 | 1.48401 |        |         | C-type lectin domain family    |
| 000053063 | 6081    | 5531    | 8026    | 41      | 3811    | 776      | 02675  | 8255    | 773     | K17516 | Clec12a | 12, member a                   |
| ENSMUSG00 | 0.82650 | 0.42560 | 0.58441 | 0.19728 | 0.03945 | 0.172465 | 0.7389 | 0.81412 | 0.49796 |        |         |                                |
| 000053318 | 8645    | 7473    | 4756    | 8677    | 3496    | 16       | 50411  | 4668    | 0402    | K16853 | Slamf8  | SLAM family member 8           |
| ENSMUSG00 | 15.9340 | 13.6684 | 12.9723 | 9.26896 | 5.12763 | 8.470829 | 14.935 | 15.8006 | 16.6962 |        |         | interferon inducible GTPase    |
| 000054072 | 85      | 2967    | 8816    | 9502    | 3413    | 981      | 85783  | 4183    | 1107    | None   | ligp1   | 1                              |
| ENSMUSG00 | 16.6348 | 11.2234 | 10.2090 | 8.62467 | 6.56798 | 7.301497 | 12.337 | 12.0097 | 9.86743 |        |         | histocompatibility 2, Q        |
| 000055413 | 9027    | 1817    | 7589    | 1153    | 3138    | 56       | 81829  | 31      | 9255    |        | H2-Q5   | region locus 5                 |
| ENSMUSG00 | 0.99918 | 0.59460 | 0.54349 | 0.45722 | 0.24923 | 0.293327 | 0.8013 | 0.77283 | 0.61890 |        |         | leukocyte-associated Ig-like   |
| 000055541 | 6562    | 6925    | 9348    | 8577    | 6538    | 169      | 74284  | 1142    | 7828    | K06725 | Lair1   | receptor 1                     |
| ENSMUSG00 | 1.35989 | 1.53746 | 1.36449 | 0.85693 | 0.98574 | 0.982459 | 1.1527 | 1.41439 | 1.55040 |        |         |                                |
| 000055660 | 5744    | 6935    | 1304    | 0406    | 3211    | 214      | 887    | 9043    | 3635    | None   | Mettl4  | methyltransferase like 4       |
|           |         |         |         |         |         |          |        |         |         |        |         | membrane-spanning              |
| ENSMUSG00 | 0.41484 | 0.49693 | 0.46764 | 0.15947 | 0.08637 | 0.181231 | 0.4498 | 0.35646 | 0.29350 |        |         | 4-domains, subfamily A,        |
| 000056290 | 2442    | 5197    | 9878    | 4713    | 2855    | 798      | 08932  | 1553    | 2149    | None   | Ms4a4b  | member 4B                      |
| ENSMUSG00 | 26.9384 | 24.8771 | 22.7351 | 18.3921 | 14.5289 | 14.69894 | 34.717 | 25.1140 | 16.7714 |        |         | Fc receptor, IgG, low affinity |
| 000059498 | 1705    | 4385    | 2984    | 5829    | 914     | 826      | 38276  | 6144    | 2066    | K16824 | Fcgr3   | III                            |
| ENSMUSG00 | 9.89400 | 2.78136 | 4.90453 | 1.21063 | 0.64013 | 1.422436 | 2.5343 | 2.25271 | 2.30469 |        | BC02310 |                                |
| 000063388 | 1959    | 3913    | 1218    | 3374    | 0555    | 981      | 50055  | 8648    | 4105    | None   | 5       | cDNA sequence BC023105         |
| ENSMUSG00 | 2.13155 | 1.84279 | 2.46151 | 0.94068 | 0.82715 | 0.848926 | 1.5443 | 1.76034 | 1.64105 |        |         | guanine nucleotide binding     |
| 000063594 | 494     | 851     | 7747    | 1749    | 771     | 585      | 09312  | 4341    | 9444    | K04544 | Gng8    | protein (G protein), gamma 8   |
|           |         |         |         |         |         |          |        |         |         |        |         | leukocyte                      |
| ENSMUSG00 | 2.20418 | 1.54842 | 1.49011 | 0.82371 | 0.63622 | 0.976795 | 1.5028 | 1.35529 | 1.26552 |        |         | immunoglobulin-like            |
| 000070873 | 5546    | 7187    | 8597    | 6384    | 2693    | 565      | 20498  | 4442    | 4488    | K06512 | Lilra5  | receptor, subfamily A (with    |
| ENSMUSG00 | 10.0081 | 10.1575 | 12.3973 | 7.41740 | 6.84340 | 8.376180 | 12.268 | 11.2679 | 10.6453 |        |         | TM domain), member 5           |
| 000071342 | 4365    | 96      | 8776    | 8268    | 3146    | 837      | 63543  | 232     | 7206    | None   | Lsmem1  | leucine-rich single-pass       |
|           |         |         |         |         |         |          |        |         |         |        |         | membrane protein 1             |
| ENSMUSG00 | 2.97892 | 1.87903 | 1.78236 | 1.49175 | 1.08397 | 1.389443 | 1.8623 | 2.11804 | 2.32285 |        |         | NLR family, CARD domain        |
| 000074151 | 1793    | 6212    | 3685    | 3046    | 9325    | 784      | 66806  | 481     | 9868    |        | Nlrc5   | containing 5                   |

|           |         |         |         |         |         |          |        |         |         |         |          |                              |
|-----------|---------|---------|---------|---------|---------|----------|--------|---------|---------|---------|----------|------------------------------|
| ENSMUSG00 | 1.08130 | 1.04778 | 0.65020 | 0.37947 | 0.08353 | 0.260835 | 0.7668 | 0.67577 | 0.47504 | K04180  | Ccr5     | chemokine (C-C motif)        |
| 000079227 | 9626    | 0984    | 1618    | 6932    | 7154    | 998      | 64763  | 2654    | 1401    |         |          | receptor 5                   |
| ENSMUSG00 | 0.44295 | 0.36183 | 0.47444 | 0.11909 | 0.12384 | 0.054138 | 0.3960 | 0.56460 | 0.57114 |         |          | prostaglandin-endoperoxide   |
| 000083816 | 8437    | 6817    | 4955    | 6832    | 7397    | 07       | 32542  | 856     | 5107    | None    | Mndal    | synthase 2 pseudogene        |
| ENSMUSG00 | 5.24925 | 8.66920 | 6.23766 | 4.69740 | 3.24682 | 4.321452 | 6.6117 | 6.72851 | 6.97892 |         |          | myeloid nuclear              |
| 000090272 | 4252    | 5126    | 3173    | 0092    | 211     | 542      | 49599  | 3579    | 3166    |         |          | differentiation antigen like |
| ENSMUSG00 | 3.86971 | 2.68359 | 2.68251 | 1.59483 | 1.46496 | 0.942455 | 3.1062 | 2.73246 | 2.20054 | None    | Phf11b   | PHD finger protein 11B       |
| 000091649 | 3339    | 1713    | 0705    | 1313    | 0941    | 096      | 13005  | 3485    | 3698    |         |          | galactose-3-O-sulfotransfera |
| ENSMUSG00 | 0.89690 | 0.99436 | 1.06856 | 0.54571 | 0.34866 | 0.620171 | 1.0655 | 1.03854 | 0.91048 |         |          | se 2B                        |
| 000093805 | 1332    | 103     | 4379    | 9012    | 7731    | 284      | 19588  | 0012    | 8215    | BC14752 | Gal3st2b |                              |
| ENSMUSG00 | 0.64999 | 0.90381 | 0.33537 | 0.14206 | 0.04103 | 0.161446 | 0.4124 | 0.41354 | 0.27889 |         |          | cDNA sequence BC147527       |
| 000094796 | 6377    | 5493    | 3587    | 4974    | 6583    | 853      | 20095  | 9454    | 1447    |         |          | phospholipid scramblase      |
| ENSMUSG00 | 1.60056 | 2.17377 | 1.82461 | 1.09925 | 0.76939 | 0.840821 | 1.2803 | 2.08345 | 2.02754 | Gm2865  | Plscr5   | family, member 5             |
| 000095654 | 3924    | 8553    | 4644    | 0762    | 2854    | 959      | 7221   | 5239    | 1153    |         |          |                              |
| ENSMUSG00 | 1.78828 | 1.61685 | 1.76287 | 0.83206 | 0.91143 | 1.243074 | 1.4767 | 1.70288 | 1.73439 |         |          | predicted gene 28651         |
| 000101086 | 226     | 0074    | 5134    | 805     | 728     | 824      | 02847  | 5106    | 8257    | 7       |          |                              |
| ENSMUSG00 | 2.82779 | 2.42127 | 2.22381 | 0.99345 | 0.77481 | 0.999967 | 2.5282 | 2.97457 | 2.29257 |         |          |                              |
| 000103649 | 2728    | 2276    | 1402    | 8243    | 4168    | 388      | 23525  | 2174    | 8426    |         |          |                              |
| ENSMUSG00 | 0.05627 | 0.12185 | 0.04327 | 0.03584 | 0.00847 | 0.003703 | 0.0774 | 0.10976 | 0.15216 | Gbp5    | Gm3408   | guanylate binding protein 5  |
| 000105449 | 2807    | 3965    | 2786    | 6204    | 1829    | 336      | 02166  | 8544    | 5034    |         |          |                              |
| ENSMUSG00 | 8.16495 | 5.26366 | 4.12121 | 3.61300 | 2.68365 | 2.940420 | 4.2191 | 5.55279 | 6.01467 |         |          |                              |
| 000105504 | 2862    | 3026    | 2119    | 3437    | 7023    | 782      | 80552  | 1166    | 0828    | Gm4084  | 4        | predicted gene, 34084        |
| ENSMUSG00 | 0.38647 | 0.54397 | 0.72119 | 0.05819 | 0.02521 | 0.044086 | 0.4607 | 0.36298 | 0.09791 |         |          |                              |
| 000113010 | 953     | 7502    | 532     | 0455    | 3155    | 241      | 15823  | 2269    | 5883    |         |          |                              |
| ENSMUSG00 | 0.48626 | 0.79653 | 0.38553 | 0.20828 | 0.08204 | 0.157799 | 0.3373 | 0.33071 | 0.31861 | 1       |          | predicted gene, 40841        |
| 000113216 | 598     | 3615    | 4597    | 361     | 2303    | 785      | 07736  | 5156    | 3228    |         |          |                              |
| ENSMUSG00 | 7.13356 | 8.95199 | 8.56261 | 10.2402 | 11.0590 | 9.996689 | 7.8408 | 7.37224 | 7.53046 |         |          |                              |
| 000000296 | 1159    | 2653    | 9073    | 1515    | 1389    | 858      | 69048  | 019     | 5044    | None    | Tpd52l1  | tumor protein D52-like 1     |
| ENSMUSG00 | 6.82230 | 5.84690 | 8.64816 | 11.2118 | 11.3046 | 9.281590 | 7.8445 | 7.94334 | 8.06871 |         |          |                              |
| 000001739 | 5181    | 0136    | 8664    | 7096    | 3997    | 721      | 46788  | 4689    | 6662    |         |          | claudin 15                   |
| ENSMUSG00 | 53.5117 | 52.8090 | 58.3211 | 81.3093 | 95.6044 | 78.10630 | 69.504 | 65.0465 | 60.6493 | K06087  | Cldn15   |                              |
|           |         |         |         |         |         |          |        |         |         | K20254  | Plin4    | perilipin 4                  |

|           |         |         |         |         |         |          |        |         |         |        |         |                              |
|-----------|---------|---------|---------|---------|---------|----------|--------|---------|---------|--------|---------|------------------------------|
| 000002831 | 0326    | 07      | 0483    | 399     | 186     | 406      | 5367   | 5717    | 5496    |        |         |                              |
| ENSMUSG00 | 25.0281 | 26.4699 | 30.9802 | 83.9235 | 82.4700 | 74.70460 | 59.412 | 56.8997 | 52.3661 |        |         | indolethylamine              |
| 000003477 | 7991    | 0988    | 1296    | 6779    | 0452    | 531      | 23561  | 5689    | 326     | K00562 | Inmt    | N-methyltransferase          |
| ENSMUSG00 | 107.436 | 100.081 | 117.215 | 145.167 | 172.680 | 145.8547 | 104.68 | 112.086 | 116.679 |        |         |                              |
| 000011305 | 3794    | 7258    | 95      | 4886    | 1728    | 761      | 17104  | 171     | 5691    | K20255 | Plin5   | perilipin 5                  |
| ENSMUSG00 | 27.9750 | 27.7038 | 27.9162 | 41.3328 | 43.0874 | 41.84888 | 27.640 | 31.7711 | 34.2834 |        |         | solute carrier family 41,    |
| 000013275 | 8394    | 909     | 1857    | 4849    | 5066    | 963      | 57565  | 778     | 0057    | K15122 | Slc41a1 | member 1                     |
| ENSMUSG00 | 3.86667 | 3.93007 | 3.84605 | 6.06263 | 6.32532 | 6.002627 | 4.3668 | 4.21410 | 4.19843 |        |         | wingless-type MMTV           |
| 000015957 | 6742    | 0627    | 1615    | 27      | 3663    | 166      | 01007  | 0382    | 7867    | K01384 | Wnt11   | integration site family,     |
| ENSMUSG00 | 12.5218 | 10.2054 | 10.6853 | 15.2772 | 16.9528 | 13.69486 | 10.587 | 10.7906 | 11.7740 |        |         | member 11                    |
| 000019066 | 9699    | 3415    | 4036    | 856     | 5537    | 989      | 50095  | 4274    | 952     | K07884 | Rab3d   | RAB3D, member RAS            |
| ENSMUSG00 | 18.3798 | 17.6735 | 17.7632 | 22.2598 | 24.1009 | 21.93683 | 16.776 | 16.1312 | 15.9366 |        |         | oncogene family              |
| 000019139 | 8527    | 6689    | 257     | 9413    | 0703    | 929      | 09142  | 6547    | 0212    | K01858 | Isyna1  | myo-inositol 1-phosphate     |
| ENSMUSG00 | 7.97196 | 6.13326 | 6.81239 | 8.54570 | 10.1659 | 8.539231 | 5.9022 | 6.10461 | 6.54474 |        |         | synthase A1                  |
| 000020782 | 4196    | 3502    | 2051    | 549     | 2716    | 386      | 77344  | 4097    | 9686    | K06094 | Llg12   | LLGL2 scribble cell polarity |
| ENSMUSG00 | 1.26219 | 1.69565 | 1.91713 | 1.95199 | 2.40327 | 2.469435 | 1.1722 | 1.43357 | 1.79412 |        |         | complex component            |
| 000021280 | 8273    | 9146    | 8875    | 6384    | 5402    | 687      | 23881  | 8189    | 6652    | None   | Exoc3l4 | exocyst complex component    |
| ENSMUSG00 | 1.59033 | 1.67119 | 1.75684 | 3.02339 | 2.87331 | 3.806458 | 2.2323 | 2.54267 | 2.61326 |        |         | 3-like 4                     |
| 000022231 | 1026    | 5445    | 0683    | 1368    | 0593    | 784      | 68278  | 8091    | 8847    | K06841 | Sema5a  | sema domain, seven           |
| ENSMUSG00 | 108.508 | 87.7082 | 90.4217 | 116.588 | 125.617 | 112.1443 | 102.17 | 89.7050 | 79.8958 |        |         | thrombospondin repeats       |
| 000022579 | 729     | 7727    | 0301    | 7337    | 3388    | 743      | 19608  | 1813    | 6375    | K20001 | Gpihbp1 | (type 1 and type 1-like),    |
| ENSMUSG00 | 12.4099 | 9.51452 | 7.29865 | 11.8929 | 15.1755 | 13.29852 | 9.4592 | 8.47357 | 8.82985 |        |         | transmembrane domain         |
| 000023439 | 1493    | 3069    | 6257    | 6064    | 3275    | 131      | 99472  | 1352    | 3854    | K07825 | Gnb3    | (TM) and short cytoplasmic   |
| ENSMUSG00 | 72.6670 | 64.5789 | 72.4417 | 86.1408 | 104.375 | 88.01811 | 59.398 | 65.4311 | 69.3093 |        |         | domain, (semaphorin) 5A      |
| 000024197 | 5816    | 719     | 8743    | 0772    | 1968    | 268      | 95977  | 7389    | 886     | K20287 | Plin3   | GPI-anchored HDL-binding     |
| ENSMUSG00 | 1.46158 | 1.26138 | 0.96946 | 3.20710 | 3.21979 | 2.903866 | 2.1118 | 1.86066 | 2.01382 | K06855 | Mapk4   | protein 1                    |
|           |         |         |         |         |         |          |        |         |         |        |         | guanine nucleotide binding   |
|           |         |         |         |         |         |          |        |         |         |        |         | protein (G protein), beta 3  |
|           |         |         |         |         |         |          |        |         |         |        |         |                              |
|           |         |         |         |         |         |          |        |         |         |        |         | perilipin 3                  |
|           |         |         |         |         |         |          |        |         |         |        |         | mitogen-activated protein    |

|           |         |         |         |         |         |          |        |         |         |        |          |                                 |
|-----------|---------|---------|---------|---------|---------|----------|--------|---------|---------|--------|----------|---------------------------------|
| 000024558 | 8521    | 4451    | 0983    | 403     | 5037    | 062      | 59114  | 2549    | 6318    |        |          | kinase 4                        |
| ENSMUSG00 | 15.5869 | 15.0853 | 15.9060 | 20.3664 | 21.8734 | 22.15237 | 15.766 | 15.2242 | 15.6031 |        |          | methyl-CpG binding domain       |
| 000024561 | 955     | 1487    | 4951    | 5154    | 4068    | 991      | 38888  | 6654    | 5827    | K11589 | Mbd1     | protein 1                       |
| ENSMUSG00 | 0.99196 | 0.95054 | 0.81456 | 1.69358 | 1.61206 | 4.697940 | 1.1561 | 1.06474 | 0.70683 |        |          | coronin, actin binding          |
| 000024835 | 4127    | 402     | 4357    | 471     | 6069    | 006      | 08768  | 799     | 0282    | K13886 | Coro1b   | protein 1B                      |
| ENSMUSG00 | 11.9991 | 11.2734 | 10.6299 | 15.7231 | 14.9791 | 13.05027 | 11.211 | 10.8864 | 11.1304 |        |          | phosphatidylinositol 4-kinase   |
| 000025178 | 6966    | 2043    | 7423    | 5053    | 1439    | 541      | 6802   | 9055    | 8612    | K13711 | Pi4k2a   | type 2 alpha                    |
| ENSMUSG00 | 322.317 | 289.538 | 285.927 | 463.833 | 474.193 | 426.5091 | 315.94 | 324.092 | 335.409 |        |          | patatin-like phospholipase      |
| 000025509 | 5677    | 7776    | 942     | 5701    | 9309    | 009      | 24659  | 0493    | 2728    | K16816 | Pnpla2   | domain containing 2             |
|           |         |         |         |         |         |          |        |         |         |        |          | solute carrier family 25        |
|           |         |         |         |         |         |          |        |         |         |        |          | (mitochondrial carrier,         |
| ENSMUSG00 | 8.43109 | 8.47846 | 9.20510 | 14.3993 | 13.1521 | 11.47024 | 10.479 | 9.61089 | 9.48656 |        |          | dicarboxylate transporter),     |
| 000025792 | 9662    | 1667    | 7681    | 4275    | 4357    | 605      | 20116  | 0096    | 3168    | K13577 | Slc25a10 | member 10                       |
|           |         |         |         |         |         |          |        |         |         |        |          | GNAS (guanine nucleotide        |
| ENSMUSG00 | 3.99930 | 4.95677 | 4.81964 | 6.18742 | 10.2980 | 5.596260 | 4.2498 | 4.12222 | 3.98479 |        |          | binding protein, alpha          |
| 000027523 | 754     | 1601    | 1118    | 291     | 8205    | 683      | 49586  | 2962    | 4411    | K04632 | Gnas     | stimulating) complex locus      |
| ENSMUSG00 | 0.34939 | 0.35376 | 0.39541 | 0.56081 | 0.58705 | 0.682445 | 0.3064 | 0.34673 | 0.40711 |        |          | spalt like transcription factor |
| 000027547 | 842     | 0518    | 7557    | 3907    | 4482    | 965      | 89998  | 0471    | 4285    | K19871 | Sall4    | 4                               |
| ENSMUSG00 | 17.4594 | 17.5517 | 16.2916 | 21.2305 | 22.4995 | 20.46444 | 15.120 | 14.4452 | 15.3558 |        |          | phospholipase A2, group         |
| 000027999 | 0222    | 7408    | 6591    | 309     | 8879    | 385      | 11741  | 7085    | 7438    | K01047 | Pla2g12a | XIIA                            |
|           |         |         |         |         |         |          |        |         |         |        |          | protein tyrosine                |
| ENSMUSG00 | 2.25639 | 1.93129 | 1.94474 | 4.06303 | 4.73832 | 3.793016 | 3.1950 | 3.11007 | 3.11132 |        |          | phosphatase, receptor type,     |
| 000028909 | 0215    | 868     | 5601    | 925     | 5973    | 459      | 52469  | 7621    | 0042    | K16662 | Ptpru    | U                               |
| ENSMUSG00 | 11.2635 | 9.74772 | 11.4610 | 13.4764 | 14.3145 | 12.96846 | 9.9722 | 10.4929 | 10.3885 |        |          |                                 |
| 000029001 | 9267    | 588     | 2332    | 0889    | 6516    | 54       | 68292  | 197     | 5936    | K10103 | Fbxo44   | F-box protein 44                |
| ENSMUSG00 | 0.77370 | 0.84227 | 0.83146 | 1.67458 | 1.68460 | 1.199750 | 0.7695 | 0.81749 | 1.02910 |        |          |                                 |
| 000029123 | 4153    | 6327    | 3182    | 8253    | 037     | 047      | 60631  | 7372    | 7826    | K08793 | Stk32b   | serine/threonine kinase 32B     |
| ENSMUSG00 | 1.25238 | 1.73419 | 1.06650 | 2.26977 | 3.06387 | 2.182605 | 1.0989 | 1.24159 | 1.63055 |        |          | cell growth regulator with EF   |
| 000029161 | 6649    | 5498    | 3125    | 7492    | 0368    | 209      | 76571  | 0669    | 0697    | None   | Cgref1   | hand domain 1                   |
| ENSMUSG00 | 1.65172 | 1.98531 | 1.68388 | 2.73315 | 2.12843 | 2.504421 | 1.5498 | 1.61274 | 1.83339 |        |          |                                 |
| 000031155 | 5947    | 8379    | 9051    | 8736    | 4094    | 833      | 52533  | 1759    | 7108    | K08806 | Pim2     | proviral integration site 2     |

|           |         |         |         |         |         |          |        |         |         |        |          |                                 |
|-----------|---------|---------|---------|---------|---------|----------|--------|---------|---------|--------|----------|---------------------------------|
| ENSMUSG00 | 135.684 | 127.713 | 126.519 | 255.413 | 245.223 | 199.8091 | 164.49 | 165.040 | 165.486 |        |          |                                 |
| 000031765 | 4972    | 1327    | 8789    | 837     | 8383    | 221      | 385    | 3544    | 8221    | K14739 | Mt1      | metallothionein 1               |
| ENSMUSG00 | 98.7345 | 98.3973 | 106.667 | 149.900 | 163.929 | 150.1972 | 106.11 | 114.484 | 115.948 |        |          | solute carrier family 27 (fatty |
| 000031808 | 6544    | 0907    | 2583    | 5242    | 3111    | 3        | 07265  | 6454    | 7556    | K08745 | Slc27a1  | acid transporter), member 1     |
| ENSMUSG00 | 0.12895 | 0.07563 | 0.04297 | 0.42069 | 0.96749 | 2.059473 | 0.1152 | 0.08074 | 0.04084 |        |          | RAB3A, member RAS               |
| 000031840 | 8979    | 012     | 2435    | 6548    | 8092    | 426      | 97392  | 567     | 0237    | K07882 | Rab3a    | oncogene family                 |
| ENSMUSG00 | 14.0837 | 13.9332 | 14.1236 | 16.9491 | 18.9229 | 15.95466 | 11.638 | 13.2066 | 14.7946 |        |          | purinergic receptor P2Y,        |
| 000032860 | 5391    | 734     | 165     | 6027    | 9584    | 549      | 43756  | 2344    | 6396    | K04269 | P2ry2    | G-protein coupled 2             |
| ENSMUSG00 | 0.08777 | 0.12134 | 0.18803 | 0.41536 | 0.42948 | 0.557863 | 0.1345 | 0.22376 | 0.20253 |        |          | acid-sensing (proton-gated)     |
| 000033007 | 7853    | 2813    | 4615    | 9739    | 3919    | 684      | 35239  | 8747    | 2047    | K04831 | Asic4    | ion channel family member 4     |
| ENSMUSG00 | 3.44241 | 3.82343 | 2.82609 | 5.02383 | 5.66459 | 4.689138 | 3.8686 | 3.82917 | 3.38018 |        |          | heat shock transcription        |
| 000033249 | 6214    | 0904    | 8624    | 1746    | 4051    | 285      | 6176   | 4196    | 1289    | K09417 | Hsf4     | factor 4                        |
| ENSMUSG00 | 12.4798 | 10.3131 | 11.8204 | 13.6087 | 15.7527 | 14.50550 | 11.721 | 10.7975 | 10.4315 |        |          |                                 |
| 000034245 | 0715    | 2039    | 81      | 1423    | 1899    | 312      | 24959  | 8007    | 4779    | K11418 | Hdac11   | histone deacetylase 11          |
| ENSMUSG00 | 3.21341 | 2.70120 | 2.92683 | 7.86671 | 7.74492 | 6.618427 | 6.0545 | 5.26481 | 4.98654 |        |          |                                 |
| 000034472 | 9124    | 6431    | 5729    | 4503    | 4773    | 247      | 76503  | 8841    | 9294    | K07844 | Rasd2    | RASD family, member 2           |
| ENSMUSG00 | 157.441 | 152.645 | 135.080 | 307.773 | 262.526 | 289.0359 | 192.83 | 202.212 | 208.891 |        |          |                                 |
| 000036181 | 058     | 1432    | 3787    | 5457    | 6705    | 21       | 878    | 3652    | 7368    | K11275 | Hist1h1c | histone cluster 1, H1c          |
| ENSMUSG00 | 49.3812 | 48.7479 | 51.7872 | 89.7648 | 99.2027 | 84.79953 | 64.940 | 66.9917 | 70.7235 |        |          | leucine-rich                    |
| 000037095 | 1419    | 6302    | 1683    | 3884    | 3239    | 922      | 05482  | 8074    | 7153    | None   | Lrg1     | alpha-2-glycoprotein 1          |
|           |         |         |         |         |         |          |        |         |         |        |          | serine (or cysteine)            |
| ENSMUSG00 | 17.8379 | 15.7018 | 20.9411 | 32.3932 | 34.7374 | 32.56500 | 17.993 | 22.2405 | 26.5924 |        |          | peptidase inhibitor, clade E,   |
| 000037411 | 4067    | 0249    | 4837    | 1504    | 4671    | 217      | 89834  | 3805    | 0597    | K03982 | Serpine1 | member 1                        |
| ENSMUSG00 | 7.21290 | 6.67048 | 6.49934 | 10.2787 | 10.6355 | 9.847002 | 5.5281 | 6.19848 | 7.11072 |        |          | solute carrier family 43,       |
| 000038178 | 7045    | 1291    | 4739    | 2837    | 967     | 725      | 32058  | 7422    | 8186    | K08229 | Slc43a2  | member 2                        |
| ENSMUSG00 | 1.24235 | 1.12684 | 1.17253 | 2.13778 | 2.00105 | 1.564613 | 1.4487 | 1.41323 | 1.20232 |        |          | synaptic vesicle glycoprotein   |
| 000038486 | 8394    | 3412    | 0752    | 5391    | 4169    | 962      | 9925   | 5535    | 7521    | K06258 | Sv2a     | 2 a                             |
| ENSMUSG00 | 13.9408 | 14.9031 | 13.7534 | 18.7312 | 18.0104 | 17.02944 | 10.108 | 9.62233 | 9.21228 |        |          | dicarbonyl L-xylulose           |
| 000039450 | 3252    | 8815    | 3597    | 9959    | 1283    | 391      | 57897  | 96      | 8394    | K03331 | Dcxr     | reductase                       |
| ENSMUSG00 | 190.238 | 181.082 | 180.598 | 236.815 | 253.981 | 217.5152 | 140.70 | 151.180 | 165.080 |        |          | solute carrier family 25,       |
| 000040740 | 8697    | 4702    | 4019    | 335     | 0578    | 693      | 01275  | 0578    | 4583    | K15117 | Slc25a34 | member 34                       |

|           |         |         |         |         |         |          |        |         |         |        |         |                            |
|-----------|---------|---------|---------|---------|---------|----------|--------|---------|---------|--------|---------|----------------------------|
| ENSMUSG00 | 8.64810 | 6.65011 | 6.26734 | 10.6232 | 9.48856 | 9.338988 | 6.6325 | 6.63606 | 6.67458 |        |         | transmembrane and          |
| 000041143 | 265     | 6763    | 4448    | 3643    | 5693    | 432      | 30523  | 2704    | 4621    | None   | Tmco4   | coiled-coil domains 4      |
| ENSMUSG00 | 7.60679 | 5.75719 | 6.63720 | 11.9958 | 10.8593 | 10.88975 | 6.8857 | 6.46730 | 6.18172 |        |         |                            |
| 000041889 | 9864    | 8079    | 5935    | 815     | 9004    | 152      | 54679  | 2239    | 4625    | None   | Shisa4  | shisa family member 4      |
| ENSMUSG00 | 23.0779 | 27.2995 | 28.6890 | 37.1447 | 36.9726 | 33.94143 | 22.516 | 27.0607 | 31.2674 |        | A530016 | RIKEN cDNA A530016L24      |
| 000043122 | 4972    | 467     | 8885    | 7486    | 9991    | 797      | 08761  | 9636    | 4632    | None   | L24Rik  | gene                       |
| ENSMUSG00 | 2.22955 | 2.30816 | 2.22883 | 3.25459 | 3.12632 | 3.349694 | 2.5160 | 2.25999 | 2.36365 |        |         | leukocyte receptor cluster |
| 000043432 | 7466    | 3616    | 6965    | 6897    | 8671    | 06       | 14056  | 2532    | 3599    | None   | Leng9   | (LRC) member 9             |
| ENSMUSG00 | 5.77007 | 6.39567 | 6.62190 | 9.15687 | 10.4571 | 8.727736 | 6.6445 | 6.39473 | 5.92056 |        |         |                            |
| 000045573 | 6259    | 7513    | 6924    | 7893    | 776     | 911      | 45976  | 3872    | 5985    | K18832 | Penk    | preproenkephalin           |
| ENSMUSG00 | 2.61375 | 2.44513 | 2.71488 | 3.39789 | 3.21901 | 3.534227 | 2.2456 | 2.07165 | 2.68919 |        | B430212 | RIKEN cDNA B430212C06      |
| 000046415 | 8753    | 3591    | 1472    | 6645    | 7174    | 34       | 69084  | 1302    | 646     |        | C06Rik  | gene                       |
| ENSMUSG00 | 7.63945 | 6.61085 | 6.26730 | 9.18939 | 13.9560 | 9.199876 | 5.0298 | 6.37559 | 7.61306 |        |         | RAS,                       |
| 000049892 | 2026    | 1765    | 6921    | 6249    | 6794    | 171      | 09943  | 9927    | 6288    | K07843 | Rasd1   | dexamethasone-induced 1    |
| ENSMUSG00 | 0.87115 | 0.87929 | 0.86171 | 1.19430 | 1.12169 | 1.270945 | 0.8034 | 0.80096 | 0.80153 |        |         |                            |
| 000050737 | 969     | 6053    | 1028    | 5777    | 8471    | 752      | 67172  | 9594    | 0238    | K15729 | Ptges   | prostaglandin E synthase   |
| ENSMUSG00 | 3.31575 | 3.92268 | 3.65757 | 9.85563 | 7.10476 | 6.798399 | 5.0089 | 4.61754 | 5.59434 |        |         | cytochrome c oxidase       |
| 000051811 | 2129    | 2208    | 8609    | 9499    | 5256    | 733      | 65428  | 8119    | 4486    | K02267 | Cox6b2  | subunit VIb polypeptide 2  |
| ENSMUSG00 | 15.2487 | 14.6103 | 14.3510 | 18.1628 | 18.6916 | 17.44771 | 14.288 | 13.5830 | 12.3726 |        |         | ELMO/CED-12 domain         |
| 000056698 | 8682    | 8869    | 8057    | 128     | 3998    | 393      | 81938  | 6946    | 2213    | None   | Elmod3  | containing 3               |
| ENSMUSG00 | 0.21267 | 0.48331 | 0.30119 | 0.72048 | 1.26605 | 0.773296 | 0.0792 | 0.39949 | 0.42095 |        | Gm1003  |                            |
| 000057913 | 6388    | 935     | 4184    | 8499    | 5774    | 489      | 27496  | 2092    | 5275    |        | 2       | predicted gene 10032       |
| ENSMUSG00 | 1.49998 | 1.38980 | 1.33978 | 1.99786 | 1.84999 | 1.746484 | 1.3569 | 1.35043 | 1.45039 |        |         |                            |
| 000071454 | 0939    | 3808    | 6551    | 2004    | 5141    | 374      | 47486  | 2761    | 2014    | None   | Dtnb    | dystrobrevin, beta         |
| ENSMUSG00 | 32.8546 | 35.0159 | 39.6635 | 75.2903 | 80.1070 | 69.38922 | 57.066 | 54.2974 | 50.2566 |        |         |                            |
| 000072949 | 1548    | 0604    | 74      | 2821    | 841     | 867      | 04613  | 6144    | 8547    | K01068 | Acot1   | acyl-CoA thioesterase 1    |
| ENSMUSG00 | 1.23966 | 2.95655 | 1.84512 | 6.24242 | 5.55329 | 6.245611 | 3.3496 | 2.71668 | 3.45480 |        |         | immunoglobulin heavy       |
| 000076612 | 3336    | 2076    | 4505    | 024     | 0748    | 265      | 39323  | 6077    | 1437    |        | Ighg2c  | constant gamma 2C          |
| ENSMUSG00 | 1.36652 | 1.52998 | 1.75149 | 2.68959 | 2.52356 | 3.232452 | 1.2983 | 1.89498 | 2.47449 |        |         |                            |
| 000078234 | 1388    | 1724    | 4143    | 6088    | 3227    | 623      | 54667  | 4109    | 8797    | None   | Klhdc7a | kelch domain containing 7A |
| ENSMUSG00 | 34.5860 | 37.6966 | 36.4978 | 54.6698 | 65.9938 | 65.63155 | 53.892 | 45.5767 | 39.1381 | K15464 | Bnip3   | BCL2/adenovirus E1B        |

|           |         |         |         |         |         |          |        |         |         |          |                         |
|-----------|---------|---------|---------|---------|---------|----------|--------|---------|---------|----------|-------------------------|
| 000078566 | 7368    | 186     | 3993    | 0022    | 239     | 783      | 33831  | 9236    | 1049    |          | interacting protein 3   |
| ENSMUSG00 | 0.26797 | 0.44790 | 0.50898 | 1.12974 | 0.89159 | 0.917050 | 0.4312 | 0.47819 | 0.20367 |          |                         |
| 000095134 | 5657    | 2416    | 9211    | 0336    | 2097    | 324      | 5659   | 8116    | 7591    | Mid1-ps1 | midline 1, pseudogene 1 |
| ENSMUSG00 | 0.83608 | 1.32390 | 0.94725 | 1.76239 | 2.94540 | 2.622763 | 0.7475 | 1.15170 | 1.00616 | Gm3829   |                         |
| 000103156 | 405     | 5245    | 571     | 4923    | 0714    | 926      | 11422  | 2409    | 7297    | 3        | predicted gene, 38293   |
| ENSMUSG00 | 0.39088 | 0.55624 | 0.18388 | 2.12044 | 0.64125 | 0.295070 | 0.2466 | 0.23754 | 0.31675 |          |                         |
| 000116953 | 1508    | 1461    | 4796    | 7656    | 832     | 163      | 86478  | 6045    | 4012    |          |                         |

**Table SIV. KEGG analysis of the DEGs in DbCM compared to CK.**

| class_A                                        | class_B                    | Term                             | ID           | Input<br>number | Background<br>number | P-Value         | Input                                                                                                                                                                                                                                                                                                                                                                                                                                                                                                                                                                                                                                                                                                                                                                                                                                                                                                                                                          |
|------------------------------------------------|----------------------------|----------------------------------|--------------|-----------------|----------------------|-----------------|----------------------------------------------------------------------------------------------------------------------------------------------------------------------------------------------------------------------------------------------------------------------------------------------------------------------------------------------------------------------------------------------------------------------------------------------------------------------------------------------------------------------------------------------------------------------------------------------------------------------------------------------------------------------------------------------------------------------------------------------------------------------------------------------------------------------------------------------------------------------------------------------------------------------------------------------------------------|
| Human<br>Diseases                              | Cancers:<br>Overview       | Pathway<br>s in<br>cancer        | mmu<br>05200 | 47              | 398                  | 4.80095<br>E-13 | ENSMUSG00000032766 ENSMUSG00000030170 ENSMUSG00000002111 ENSMUSG000000023067 ENSMUSG000000031520 ENSMUSG000000027985 ENSMUSG0000020826 ENSMUSG000000022523 ENSMUSG000000030110 ENSMUSG00000045382 ENSMUSG00000005672 ENSMUSG000000028645 ENSMUSG000000024421 ENSMUSG000000041417 ENSMUSG000000027347 ENSMUSG000000027669 ENSMUSG000000022994 ENSMUSG000000050147 ENSMUSG000000022952 ENSMUSG000000026104 ENSMUSG000000021025 ENSMUSG000000038668 ENSMUSG0000027111 ENSMUSG000000063594 ENSMUSG000000042826 ENSMUSG00000031274 ENSMUSG000000021277 ENSMUSG000000067158 ENSMUSG000000031740 ENSMUSG000000086451 ENSMUSG000000027523 ENSMUSG000000031628 ENSMUSG000000066687 ENSMUSG000000026029 ENSMUSG000000083816 ENSMUSG000000024621 ENSMUSG000000023439 ENSMUSG000000033220 ENSMUSG0000017737 ENSMUSG000000031503 ENSMUSG000000031502 ENSMUSG00000031659 ENSMUSG000000015957 ENSMUSG000000007659 ENSMUSG000000071042 ENSMUSG000000052889 ENSMUSG000000049115 |
|                                                |                            |                                  |              |                 |                      |                 | ENSMUSG000000032766 ENSMUSG000000048756 ENSMUSG000000048126 ENSMUSG000000020241 ENSMUSG000000019970 ENSMUSG000000001930 ENSMUSG0000027954 ENSMUSG000000022523 ENSMUSG000000025017 ENSMUSG00000029661 ENSMUSG000000023067 ENSMUSG000000001281 ENSMUSG000000005672 ENSMUSG000000031502 ENSMUSG000000041417 ENSMUSG000000029120 ENSMUSG000000024621 ENSMUSG000000042284 ENSMUSG000000042453 ENSMUSG000000001119 ENSMUSG000000024421 ENSMUSG000000023885 ENSMUSG000000000000                                                                                                                                                                                                                                                                                                                                                                                                                                                                                       |
| Environmen<br>tal<br>Information<br>Processing | Signal<br>transducti<br>on | PI3K-Akt<br>signaling<br>pathway | mmu<br>04151 | 42              | 350                  | 5.2252E<br>-12  | ENSMUSG000000032766 ENSMUSG000000048756 ENSMUSG000000048126 ENSMUSG000000020241 ENSMUSG000000019970 ENSMUSG000000001930 ENSMUSG0000027954 ENSMUSG000000022523 ENSMUSG000000025017 ENSMUSG00000029661 ENSMUSG000000023067 ENSMUSG000000001281 ENSMUSG000000005672 ENSMUSG000000031502 ENSMUSG000000041417 ENSMUSG000000029120 ENSMUSG000000024621 ENSMUSG000000042284 ENSMUSG000000042453 ENSMUSG000000001119 ENSMUSG000000024421 ENSMUSG000000023885 ENSMUSG000000000000                                                                                                                                                                                                                                                                                                                                                                                                                                                                                       |



|                    |                          |                                  |          |    |      |             |                                                                                                                                                                                                                                                                                                                                                                                                                                                                                                                                                                                                                                                                                                                                                                                                                                                                                                                                                                                                                                                                                                                                     |
|--------------------|--------------------------|----------------------------------|----------|----|------|-------------|-------------------------------------------------------------------------------------------------------------------------------------------------------------------------------------------------------------------------------------------------------------------------------------------------------------------------------------------------------------------------------------------------------------------------------------------------------------------------------------------------------------------------------------------------------------------------------------------------------------------------------------------------------------------------------------------------------------------------------------------------------------------------------------------------------------------------------------------------------------------------------------------------------------------------------------------------------------------------------------------------------------------------------------------------------------------------------------------------------------------------------------|
| Organismal Systems | Digestive system         | Protein digestion and absorption | mmu04974 | 22 | 90   | 5.26878E-12 | 0000038668 ENSMUSG00000001506 ENSMUSG000000027111 ENSMUSG00000063594 ENSMUSG000000042826 ENSMUSG000000031274 ENSMUSG000000031490 ENSMUSG000000026971 ENSMUSG000000020108 ENSMUSG000000067158 ENSMUSG000000022817 ENSMUSG000000031520 ENSMUSG000000023439 ENSMUSG000000027995 ENSMUSG000000031503 ENSMUSG000000055980 ENSMUSG00000027669 ENSMUSG00000007659 ENSMUSG000000092368 ENSMUSG00000039115                                                                                                                                                                                                                                                                                                                                                                                                                                                                                                                                                                                                                                                                                                                                   |
|                    |                          |                                  |          |    |      |             | ENSMUSG000000048126 ENSMUSG000000020241 ENSMUSG000000058806 ENSMUSG000000029675 ENSMUSG000000061119 ENSMUSG000000010095 ENSMUSG000000029661 ENSMUSG000000026042 ENSMUSG000000026043 ENSMUSG00000001119 ENSMUSG000000001506 ENSMUSG000000027966 ENSMUSG000000031274 ENSMUSG000000028339 ENSMUSG000000026837 ENSMUSG000000067158 ENSMUSG000000004098 ENSMUSG000000000958 ENSMUSG000000033161 ENSMUSG000000022371 ENSMUSG000000031503 ENSMUSG000000031502                                                                                                                                                                                                                                                                                                                                                                                                                                                                                                                                                                                                                                                                              |
| Metabolism         | Global and overview maps | Metabolic pathway                | mmu01100 | 91 | 1298 | 3.36098E-11 | ENSMUSG0000000101111 ENSMUSG000000040364 ENSMUSG000000036880 ENSMUSG000000026003 ENSMUSG000000032420 ENSMUSG000000039450 ENSMUSG000000029925 ENSMUSG000000053604 ENSMUSG000000052102 ENSMUSG000000025509 ENSMUSG000000074207 ENSMUSG000000069835 ENSMUSG000000029330 ENSMUSG000000033793 ENSMUSG000000025190 ENSMUSG000000035824 ENSMUSG000000092329 ENSMUSG000000019916 ENSMUSG000000039347 ENSMUSG000000000320 ENSMUSG000000013584 ENSMUSG000000020638 ENSMUSG000000027227 ENSMUSG000000020534 ENSMUSG000000027875 ENSMUSG000000024843 ENSMUSG000000048087 ENSMUSG000000030972 ENSMUSG000000072949 ENSMUSG000000001270 ENSMUSG000000021608 ENSMUSG000000032315 ENSMUSG000000074264 ENSMUSG000000030483 ENSMUSG000000020407 ENSMUSG0000000101249 ENSMUSG000000005547 ENSMUSG000000024827 ENSMUSG000000019139 ENSMUSG000000024903 ENSMUSG000000020520 ENSMUSG000000030541 ENSMUSG000000083816 ENSMUSG000000026687 ENSMUSG000000033308 ENSMUSG0000000107653 ENSMUSG000000064367 ENSMUSG000000032271 ENSMUSG000000021456 ENSMUSG000000039497 ENSMUSG000000020826 ENSMUSG000000021226 ENSMUSG000000047250 ENSMUSG000000059447 ENSMUSG0 |





|                    |                                 |                                             |           |    |     |              |                                                                                                                                                                                                                                                                                                                                                                                                                                                                                                                     |
|--------------------|---------------------------------|---------------------------------------------|-----------|----|-----|--------------|---------------------------------------------------------------------------------------------------------------------------------------------------------------------------------------------------------------------------------------------------------------------------------------------------------------------------------------------------------------------------------------------------------------------------------------------------------------------------------------------------------------------|
|                    | metabolic diseases              | signaling pathway in diabetic complications |           |    |     |              | 0000031502 ENSMUSG00000029661 ENSMUSG000000067158 ENSMUSG00000031740 ENSMUSG00000026043 ENSMUSG00000026104 ENSMUSG000000001506 ENSMUSG00000015340 ENSMUSG000000052889 ENSMUSG000000031628 ENSMUSG000000049115 ENSMUSG000000031274                                                                                                                                                                                                                                                                                   |
|                    |                                 |                                             |           |    |     |              | ENSMUSG000000066861 ENSMUSG000000066800 ENSMUSG000000060586 ENSMUSG000000022504 ENSMUSG000000041417 ENSMUSG000000037548 ENSMUSG00000027509 ENSMUSG00000026104 ENSMUSG000000021025 ENSMUSG000000052776 ENSMUSG000000022965 ENSMUSG000000079547 ENSMUSG000000076617 ENSMUSG000000029580 ENSMUSG000000073421 ENSMUSG000000026896 ENSMUSG000000037649 ENSMUSG00000002325 ENSMUSG000000036594 ENSMUSG000000032690 ENSMUSG000000020641 ENSMUSG000000040033 ENSMUSG000000052889                                            |
| Human Diseases     | Infectious diseases: Viral      | Influenza A                                 | mmu 05164 | 23 | 172 | 5.60364 E-08 | ENSMUSG000000048126 ENSMUSG000000020241 ENSMUSG000000001930 ENSMUSG000000029661 ENSMUSG000000001281 ENSMUSG000000041417 ENSMUSG000000042284 ENSMUSG000000042453 ENSMUSG000000001119 ENSMUSG000000024421 ENSMUSG000000023885 ENSMUSG000000044951 ENSMUSG000000001506 ENSMUSG000000027111 ENSMUSG000000031274 ENSMUSG000000067158 ENSMUSG000000029580 ENSMUSG000000026971 ENSMUSG000000022817 ENSMUSG000000031520 ENSMUSG000000033220 ENSMUSG000000031503 ENSMUSG000000031502 ENSMUSG000000039115 ENSMUSG000000052889 |
| Cellular Processes | Cellular community - eukaryotes | Focal adhesion                              | mmu 04510 | 25 | 203 | 6.44509 E-08 | ENSMUSG000000059498 ENSMUSG000000041417 ENSMUSG000000031264 ENSMUSG000000002111 ENSMUSG000000026480 ENSMUSG000000061132 ENSMUSG00000000409 ENSMUSG000000024621 ENSMUSG00000015340 ENSMUSG000000002325 ENSMUSG00000015947 ENSMUSG000000037902 ENSMUSG000000040033 ENSMUSG00000002983 ENSMUSG000000026104 ENSMUSG000000021025 ENSMUSG000000030579 ENSMUSG000000071715 ENSMUSG000000022965 ENSMUSG000000070873                                                                                                         |
| Organismal Systems | Development                     | Osteoclast differentiation                  | mmu 04380 | 20 | 133 | 7.38699 E-08 | ENSMUSG000000030170 ENSMUSG000000028064 ENSMUSG000000003934 ENSMUSG000000027954 ENSMUSG000000029095 ENSMUSG000000057897 ENSMUSG000000000000                                                                                                                                                                                                                                                                                                                                                                         |
| Organismal Systems | Development                     | Axon guidance                               | mmu 04360 | 23 | 176 | 8.16689 E-08 |                                                                                                                                                                                                                                                                                                                                                                                                                                                                                                                     |

|                                      |                                     |                                |           |    |     |              |                                                                                                                                                                                                                                                                                                                                                                                                                                                     |
|--------------------------------------|-------------------------------------|--------------------------------|-----------|----|-----|--------------|-----------------------------------------------------------------------------------------------------------------------------------------------------------------------------------------------------------------------------------------------------------------------------------------------------------------------------------------------------------------------------------------------------------------------------------------------------|
| Environmental Information Processing | Signaling molecules and interaction | Cell adhesion molecules (CAMs) | mmu 04514 | 23 | 176 | 8.16689 E-08 | 0000028780 ENSMUSG00000045382 ENSMUSG00000041417 ENSMUSG00000021904 ENSMUSG00000006494 ENSMUSG00000022231 ENSMUSG000000031398 ENSMUSG00000066877 ENSMUSG00000031558 ENSMUSG00000005958 ENSMUSG00000056427 ENSMUSG00000032475 ENSMUSG00000033220 ENSMUSG00000020902 ENSMUSG00000001227 ENSMUSG00000019647 ENSMUSG00000052133                                                                                                                         |
|                                      |                                     |                                |           |    |     |              | ENSMUSG00000060586 ENSMUSG00000001281 ENSMUSG00000001029 ENSMUSG000000037548 ENSMUSG00000032012 ENSMUSG00000071552 ENSMUSG0000079547 ENSMUSG00000076617 ENSMUSG00000048163 ENSMUSG00000027111 ENSMUSG00000055413 ENSMUSG00000016494 ENSMUSG00000073421 ENSMUSG00000053977 ENSMUSG00000047085 ENSMUSG00000037649 ENSMUSG00000036594 ENSMUSG00000027322 ENSMUSG00000051457 ENSMUSG00000021614 ENSMUSG00000039115 ENSMUSG00000021638 ENSMUSG0000001739 |
|                                      |                                     |                                |           |    |     |              | ENSMUSG00000032766 ENSMUSG00000041112 ENSMUSG00000029417 ENSMUSG00000045382 ENSMUSG00000022994 ENSMUSG00000041417 ENSMUSG0000027669 ENSMUSG00000026104 ENSMUSG00000021025 ENSMUSG00000020676 ENSMUSG00000063594 ENSMUSG00000048756 ENSMUSG00000003283 ENSMUSG00000026180 ENSMUSG00000020395 ENSMUSG00000023439 ENSMUSG00000033220 ENSMUSG00000059456 ENSMUSG00000031659 ENSMUSG00000052336 ENSMUSG00000040033 ENSMUSG00000052889 ENSMUSG0000020143  |
| Organismal Systems                   | Immune system                       | Chemokine signaling pathway    | mmu 04062 | 23 | 198 | 5.44049 E-07 | ENSMUSG00000044734 ENSMUSG00000041417 ENSMUSG00000026073 ENSMUSG00000027995 ENSMUSG00000031503 ENSMUSG00000031502 ENSMUSG0000029661 ENSMUSG00000067158 ENSMUSG00000052688 ENSMUSG00000026043 ENSMUSG00000024421 ENSMUSG00000020826 ENSMUSG00000027523 ENSMUSG00000001506 ENSMUSG00000052889 ENSMUSG00000031628 ENSMUSG00000031274                                                                                                                   |
|                                      |                                     |                                |           |    |     |              | ENSMUSG00000037649 ENSMUSG00000037548 ENSMUSG00000036594 ENSMUSG00000060586 ENSMUSG00000079547 ENSMUSG00000076617 ENSMUSG0000058715 ENSMUSG00000073421 ENSMUSG00000020676                                                                                                                                                                                                                                                                           |
| Human Diseases                       | Infectious diseases: Parasitic      | Amoebiasis                     | mmu 05146 | 17 | 111 | 5.49253 E-07 |                                                                                                                                                                                                                                                                                                                                                                                                                                                     |
| Human Diseases                       | Immune diseases                     | Asthma                         | mmu 05310 | 9  | 26  | 9.40619 E-07 |                                                                                                                                                                                                                                                                                                                                                                                                                                                     |

|                    |                                |                                      |          |    |     |             |                                                                                                                                                                                                                                                                                                                                   |
|--------------------|--------------------------------|--------------------------------------|----------|----|-----|-------------|-----------------------------------------------------------------------------------------------------------------------------------------------------------------------------------------------------------------------------------------------------------------------------------------------------------------------------------|
| Organismal Systems | Immune system                  | Leukocyte transendothelial migration | mmu04670 | 17 | 121 | 1.60151E-06 | ENSMUSG00000059456 ENSMUSG00000056917 ENSMUSG00000041417 ENSMUSG00000026480 ENSMUSG00000020395 ENSMUSG00000033220 ENSMUSG0000052889 ENSMUSG00000017737 ENSMUSG00000032011 ENSMUSG00000015340 ENSMUSG00000031740 ENSMUSG00000068036 ENSMUSG00000045382 ENSMUSG00000029580 ENSMUSG00000021638 ENSMUSG00000001739 ENSMUSG00000071715 |
| Organismal Systems | Immune system                  | Platelet activation                  | mmu04611 | 17 | 123 | 1.95885E-06 | ENSMUSG00000031659 ENSMUSG00000041417 ENSMUSG00000031264 ENSMUSG00000029661 ENSMUSG00000050147 ENSMUSG00000047250 ENSMUSG0000001930 ENSMUSG00000027347 ENSMUSG00000034881 ENSMUSG00000026043 ENSMUSG00000058715 ENSMUSG00000027523 ENSMUSG00000044951 ENSMUSG00000029580 ENSMUSG00000022994 ENSMUSG00000001506 ENSMUSG00000029925 |
| Organismal Systems | Environmental adaptation       | Circadian entrainment                | mmu04713 | 15 | 98  | 2.53228E-06 | ENSMUSG00000032766 ENSMUSG00000055866 ENSMUSG00000024112 ENSMUSG00000023439 ENSMUSG00000027669 ENSMUSG00000022994 ENSMUSG0000049892 ENSMUSG00000031659 ENSMUSG00000020866 ENSMUSG00000057897 ENSMUSG00000015968 ENSMUSG00000027523 ENSMUSG00000063594 ENSMUSG00000052889 ENSMUSG00000020893                                       |
| Organismal Systems | Nervous system                 | GABAergic synapse                    | mmu04727 | 14 | 89  | 4.09241E-06 | ENSMUSG00000032766 ENSMUSG00000031340 ENSMUSG00000031343 ENSMUSG00000023439 ENSMUSG00000026473 ENSMUSG00000022994 ENSMUSG0000097675 ENSMUSG00000031659 ENSMUSG00000027669 ENSMUSG00000057880 ENSMUSG00000026407 ENSMUSG00000015968 ENSMUSG00000052889 ENSMUSG00000063594                                                          |
| Human Diseases     | Infectious diseases: Bacterial | Staphylococcus aureus infection      | mmu05150 | 11 | 53  | 4.34897E-06 | ENSMUSG00000037649 ENSMUSG00000037548 ENSMUSG00000036594 ENSMUSG00000060586 ENSMUSG00000015947 ENSMUSG00000059498 ENSMUSG0000056529 ENSMUSG00000079547 ENSMUSG00000076617 ENSMUSG00000048163 ENSMUSG00000073421                                                                                                                   |
| Human Diseases     | Cardiovascular diseases        | Dilated cardiomyopathy               | mmu05414 | 14 | 90  | 4.5941E-06  | ENSMUSG00000027523 ENSMUSG00000053093 ENSMUSG00000026407 ENSMUSG00000022817 ENSMUSG00000042284 ENSMUSG00000026971 ENSMUSG0000031659 ENSMUSG00000015968 ENSMUSG00000039115 ENSMUSG0000001281 ENSMUSG00000022994 ENSMUSG00000029580 ENSMUSG00000027111 ENSMUSG00000031799                                                           |

|                                      |                                 |                                              |          |    |     |             |                                                                                                                                                                                                                                                                                                                                                                                                                                                    |
|--------------------------------------|---------------------------------|----------------------------------------------|----------|----|-----|-------------|----------------------------------------------------------------------------------------------------------------------------------------------------------------------------------------------------------------------------------------------------------------------------------------------------------------------------------------------------------------------------------------------------------------------------------------------------|
|                                      |                                 |                                              |          |    |     |             | ENSMUSG00000033318 ENSMUSG00000027890 ENSMUSG00000003549 ENSMUSG000000041417 ENSMUSG00000028329 ENSMUSG00000023067 ENSMUSG0000026688 ENSMUSG00000020914 ENSMUSG00000058135 ENSMUSG0000008540 ENSMUSG00000007659 ENSMUSG00000031628 ENSMUSG00000026029                                                                                                                                                                                              |
| Human Diseases                       | Drug resistance: Antineoplastic | Platinum drug resistance                     | mmu01524 | 13 | 78  | 5.12739E-06 |                                                                                                                                                                                                                                                                                                                                                                                                                                                    |
| Organismal Systems                   | Immune system                   | Intestinal immune network for IgA production | mmu04672 | 10 | 44  | 5.89574E-06 | ENSMUSG00000037649 ENSMUSG00000037548 ENSMUSG00000036594 ENSMUSG00000060586 ENSMUSG00000045382 ENSMUSG00000079547 ENSMUSG0000076617 ENSMUSG00000001281 ENSMUSG00000073421 ENSMUSG00000010142                                                                                                                                                                                                                                                       |
| Environmental Information Processing | Signal transduction             | Ras signaling pathway                        | mmu04014 | 23 | 231 | 5.90149E-06 | ENSMUSG00000032766 ENSMUSG00000052142 ENSMUSG00000027954 ENSMUSG00000022523 ENSMUSG00000005672 ENSMUSG00000041417 ENSMUSG0000027347 ENSMUSG00000027669 ENSMUSG00000024621 ENSMUSG00000032035 ENSMUSG00000063594 ENSMUSG00000042826 ENSMUSG00000068036 ENSMUSG00000030742 ENSMUSG00000031520 ENSMUSG00000023439 ENSMUSG00000027999 ENSMUSG00000033220 ENSMUSG00000041193 ENSMUSG00000041202 ENSMUSG00000007659 ENSMUSG00000071042 ENSMUSG0000052889 |
| Human Diseases                       | Infectious diseases: Viral      | Hepatitis C                                  | mmu05160 | 17 | 137 | 7.23607E-06 | ENSMUSG00000066861 ENSMUSG00000018899 ENSMUSG00000022383 ENSMUSG00000034459 ENSMUSG00000029120 ENSMUSG00000021277 ENSMUSG0000023067 ENSMUSG00000066800 ENSMUSG00000002325 ENSMUSG00000040033 ENSMUSG00000032690 ENSMUSG00000026104 ENSMUSG00000021025 ENSMUSG00000052776 ENSMUSG00000021638 ENSMUSG00000001739 ENSMUSG00000041417                                                                                                                  |
| Human Diseases                       | Cardiovascular diseases         | Viral myocarditis                            | mmu05416 | 14 | 96  | 8.92314E-06 | ENSMUSG00000037649 ENSMUSG00000026029 ENSMUSG00000053093 ENSMUSG00000033220 ENSMUSG00000037548 ENSMUSG00000036594 ENSMUSG0000060586 ENSMUSG00000026399 ENSMUSG00000055413 ENSMUSG00000079547 ENSMUSG00000076617 ENSMUSG00000029580 ENSMUSG00000073421 ENSMUSG00000031628                                                                                                                                                                           |
| Metabolism                           | Lipid                           | Fatty                                        | mmu      | 8  | 27  | 9.90594     | ENSMUSG00000028937 ENSMUSG00000072949 ENSMUSG00000059447 ENSM                                                                                                                                                                                                                                                                                                                                                                                      |

|                    |                            |                                  |           |    |     |              |                                                                                                                                                                                                                                                                                                                                                                                                                                                                                                             |
|--------------------|----------------------------|----------------------------------|-----------|----|-----|--------------|-------------------------------------------------------------------------------------------------------------------------------------------------------------------------------------------------------------------------------------------------------------------------------------------------------------------------------------------------------------------------------------------------------------------------------------------------------------------------------------------------------------|
|                    | metabolism                 | acid elongation                  | 00062     |    |     | E-06         | USG00000063275 ENSMUSG00000028497 ENSMUSG00000025745 ENSMUSG0000021226 ENSMUSG00000036880                                                                                                                                                                                                                                                                                                                                                                                                                   |
|                    |                            | Inflammatory bowel disease (IBD) |           |    |     |              | ENSMUSG00000037649 ENSMUSG00000037548 ENSMUSG00000027995 ENSMUSG00000036594 ENSMUSG00000060586 ENSMUSG00000022965 ENSMUSG0000026104 ENSMUSG00000079547 ENSMUSG00000076617 ENSMUSG00000073421 ENSMUSG00000030745                                                                                                                                                                                                                                                                                             |
| Human Diseases     | Immune diseases            | disease (IBD)                    | mmu 05321 | 11 | 59  | 1.06666 E-05 | ENSMUSG00000030170 ENSMUSG00000002111 ENSMUSG00000060586 ENSMUSG00000063889 ENSMUSG00000022994 ENSMUSG00000033863 ENSMUSG0000028645 ENSMUSG00000041417 ENSMUSG00000037548 ENSMUSG00000032035 ENSMUSG00000002983 ENSMUSG00000021025 ENSMUSG00000076617 ENSMUSG00000028211 ENSMUSG00000029521 ENSMUSG00000079547 ENSMUSG00000055413 ENSMUSG00000073421 ENSMUSG00000037649 ENSMUSG00000000409 ENSMUSG00000023067 ENSMUSG00000036594 ENSMUSG0000031659 ENSMUSG00000015957 ENSMUSG00000007659 ENSMUSG00000026073 |
| Human Diseases     | Infectious diseases: Viral | HTLV-I infection B cell receptor | mmu 05166 | 26 | 295 | 1.13029 E-05 | ENSMUSG00000025491 ENSMUSG00000041417 ENSMUSG00000031264 ENSMUSG00000026288 ENSMUSG00000061132 ENSMUSG00000021025 ENSMUSG0000033220 ENSMUSG00000036526 ENSMUSG00000025017 ENSMUSG00000040592 ENSMUSG00000071042 ENSMUSG00000052889                                                                                                                                                                                                                                                                          |
| Organismal Systems | Immune system              | signaling pathway                | mmu 04662 | 12 | 75  | 1.69239 E-05 | ENSMUSG00000055866 ENSMUSG00000017737 ENSMUSG00000037169 ENSMUSG00000024621 ENSMUSG00000002111 ENSMUSG00000030795 ENSMUSG0000043613 ENSMUSG00000048416 ENSMUSG00000023067 ENSMUSG00000020427 ENSMUSG00000066687 ENSMUSG00000025223 ENSMUSG00000015947 ENSMUSG00000022952 ENSMUSG00000007659 ENSMUSG00000001281 ENSMUSG00000013089 ENSMUSG00000026073 ENSMUSG00000014030                                                                                                                                     |
| Human Diseases     | Cancers: Overview          | Arachidonic acid metabolism      | mmu 05202 | 19 | 180 | 1.77126 E-05 | ENSMUSG00000083816 ENSMUSG00000000320 ENSMUSG00000027999 ENSMUSG00000041193 ENSMUSG00000022040 ENSMUSG00000006344 ENSMUSG0000047250 ENSMUSG00000018924 ENSMUSG00000041202 ENSMUSG00000030483 ENSMUSG00000015090 ENSMUSG00000050737 ENSMUSG000000299                                                                                                                                                                                                                                                         |
| Metabolism         | Lipid metabolism           | metabolism                       | mmu 00590 | 13 | 90  | 2.02657 E-05 |                                                                                                                                                                                                                                                                                                                                                                                                                                                                                                             |



|                                      |                         |                                           |          |    |     |             |                                                                                                                                                                                                                                                                                                                                                                                                                                 |
|--------------------------------------|-------------------------|-------------------------------------------|----------|----|-----|-------------|---------------------------------------------------------------------------------------------------------------------------------------------------------------------------------------------------------------------------------------------------------------------------------------------------------------------------------------------------------------------------------------------------------------------------------|
| Cellular Processes                   | Cell motility           | Regulation of actin cytoskeleton          | mmu04810 | 21 | 218 | 2.31977E-05 | ENSMUSG000000042826 ENSMUSG000000022488 ENSMUSG000000022443 ENSMUSG000000041417 ENSMUSG000000030789 ENSMUSG000000033220 ENSMUSG0000020900 ENSMUSG000000046993 ENSMUSG000000042284 ENSMUSG00000026971 ENSMUSG000000049775 ENSMUSG000000022523 ENSMUSG000000025372 ENSMUSG000000034480 ENSMUSG000000044951 ENSMUSG000000022817 ENSMUSG000000039115 ENSMUSG00000001281 ENSMUSG000000037946 ENSMUSG000000029580 ENSMUSG000000027111 |
|                                      |                         | Natural killer cell mediated cytotoxicity | mmu04650 | 15 | 121 | 2.48136E-05 | ENSMUSG00000001029 ENSMUSG000000005763 ENSMUSG000000041417 ENSMUSG000000000409 ENSMUSG000000033220 ENSMUSG000000059456 ENSMUSG0000015355 ENSMUSG000000054520 ENSMUSG000000030579 ENSMUSG00000033024 ENSMUSG000000030742 ENSMUSG000000022965 ENSMUSG000000031628 ENSMUSG000000052889 ENSMUSG000000058715                                                                                                                         |
| Organismal Systems                   | Immune system           |                                           |          |    |     |             | ENSMUSG000000041417 ENSMUSG000000028645 ENSMUSG000000005413 ENSMUSG000000037411 ENSMUSG000000023067 ENSMUSG000000031490 ENSMUSG0000015340 ENSMUSG000000020826 ENSMUSG000000022965 ENSMUSG00000057897 ENSMUSG000000092368 ENSMUSG000000026773 ENSMUSG000000052889 ENSMUSG000000006494                                                                                                                                            |
| Environmental Information Processing | Signal transduction     | HIF-1 signaling pathway                   | mmu04066 | 14 | 110 | 3.52656E-05 | ENSMUSG000000021135 ENSMUSG000000037583 ENSMUSG000000060961 ENSMUSG000000031659 ENSMUSG000000029802 ENSMUSG000000023829 ENSMUSG0000000027523 ENSMUSG000000033161 ENSMUSG000000022994 ENSMUSG00000038776 ENSMUSG000000028645                                                                                                                                                                                                     |
| Organismal Systems                   | Digestive system        | Bile secretion                            | mmu04976 | 11 | 71  | 4.90723E-05 | ENSMUSG000000024421 ENSMUSG000000083816 ENSMUSG000000041417 ENSMUSG000000021277 ENSMUSG000000031503 ENSMUSG000000031502 ENSMUSG000000067158 ENSMUSG000000020826 ENSMUSG000000007659 ENSMUSG00000021025 ENSMUSG000000027111 ENSMUSG000000031274                                                                                                                                                                                  |
| Human Diseases                       | Cancers: Specific types | Small cell lung cancer                    | mmu05222 | 12 | 85  | 5.11077E-05 | ENSMUSG000000026687 ENSMUSG000000039783 ENSMUSG000000027187 ENSMUSG000000003477 ENSMUSG000000024087 ENSMUSG000000025745 ENSMUSG000000063558 ENSMUSG000000032315 ENSMUSG000000024903                                                                                                                                                                                                                                             |
| Metabolism                           | Amino acid metabolism   | Tryptophan metabolism                     | mmu00380 | 9  | 47  | 5.60128E-05 |                                                                                                                                                                                                                                                                                                                                                                                                                                 |

|                                      |                     |                                      |          |    |     |             |                                                                                                                                                                                                                                                                                                                                                      |
|--------------------------------------|---------------------|--------------------------------------|----------|----|-----|-------------|------------------------------------------------------------------------------------------------------------------------------------------------------------------------------------------------------------------------------------------------------------------------------------------------------------------------------------------------------|
| Organismal Systems                   | Endocrine system    | Aldosterone synthesis and secretion  | mmu04925 | 12 | 86  | 5.65998E-05 | ENSMUSG00000024112 ENSMUSG00000053214 ENSMUSG00000022994 ENSMUSG000000039145 ENSMUSG00000031659 ENSMUSG00000026407 ENSMUSG0000020866 ENSMUSG00000057897 ENSMUSG00000015968 ENSMUSG00000027523 ENSMUSG00000052889 ENSMUSG00000049115                                                                                                                  |
|                                      |                     |                                      |          |    |     |             | ENSMUSG00000030798 ENSMUSG00000026073 ENSMUSG00000024621 ENSMUSG00000042284 ENSMUSG00000060586 ENSMUSG00000015947 ENSMUSG0000026399 ENSMUSG00000005540 ENSMUSG00000016494 ENSMUSG00000005672 ENSMUSG00000053977 ENSMUSG00000027111                                                                                                                   |
| Organismal Systems                   | Immune system       | Hematopoietic cell lineage           | mmu04640 | 12 | 87  | 6.25942E-05 | ENSMUSG00000019828 ENSMUSG00000020937 ENSMUSG00000024112 ENSMUSG00000086451 ENSMUSG00000059456 ENSMUSG00000015968 ENSMUSG0000031659 ENSMUSG00000020866 ENSMUSG00000026407 ENSMUSG00000034881 ENSMUSG00000057897 ENSMUSG00000020788 ENSMUSG00000020826 ENSMUSG00000044951 ENSMUSG00000056529 ENSMUSG00000052889 ENSMUSG00000049115 ENSMUSG00000027523 |
| Environmental Information Processing | Signal transduction | Calcium signaling pathway            | mmu04020 | 18 | 182 | 6.35109E-05 | ENSMUSG00000061740 ENSMUSG00000032766 ENSMUSG00000083816 ENSMUSG00000023439 ENSMUSG00000027669 ENSMUSG00000026407 ENSMUSG0000000320 ENSMUSG00000047250 ENSMUSG00000018924 ENSMUSG00000015968 ENSMUSG00000027523 ENSMUSG00000031628 ENSMUSG00000052889 ENSMUSG00000060882 ENSMUSG00000063594                                                          |
| Organismal Systems                   | Nervous system      | Serotonergic synapse                 | mmu04726 | 15 | 133 | 6.66671E-05 | ENSMUSG00000032766 ENSMUSG00000019828 ENSMUSG00000031340 ENSMUSG00000031343 ENSMUSG00000023439 ENSMUSG00000027669 ENSMUSG0000022994 ENSMUSG00000083816 ENSMUSG00000031659 ENSMUSG00000026407 ENSMUSG00000015968 ENSMUSG00000052889 ENSMUSG00000063594                                                                                                |
| Organismal Systems                   | Nervous system      | Retrograde endocannabinoid signaling | mmu04723 | 13 | 103 | 7.17245E-05 | ENSMUSG00000026687 ENSMUSG00000074207 ENSMUSG00000018574 ENSMUSG00000026003 ENSMUSG00000059447 ENSMUSG00000020777 ENSMUSG0000025745 ENSMUSG00000024900 ENSMUSG00000036880                                                                                                                                                                            |
| Metabolism                           | Lipid metabolism    | Fatty acid degradation               | mmu00071 | 9  | 49  | 7.44547E-05 | ENSMUSG00000083816 ENSMUSG00000031264 ENSMUSG00000000409 ENSMUSG00000061132 ENSMUSG00000021277 ENSMUSG00000056130 ENSMUSG00000000000                                                                                                                                                                                                                 |
| Environmental                        | Signal transduction | NF-kappa B                           | mmu04064 | 13 | 104 | 7.84094E-05 |                                                                                                                                                                                                                                                                                                                                                      |

|                        |                          |                                         |          |    |     |             |                                                                                                                                                                                                                                                                                                                                                                                                                                                                                                                                                                                                                                                                                                                                                                                                                                                                                                                                                                                                                                                                                                                                                                                                                                                                                                                                                                                                                                                                                                                                                           |
|------------------------|--------------------------|-----------------------------------------|----------|----|-----|-------------|-----------------------------------------------------------------------------------------------------------------------------------------------------------------------------------------------------------------------------------------------------------------------------------------------------------------------------------------------------------------------------------------------------------------------------------------------------------------------------------------------------------------------------------------------------------------------------------------------------------------------------------------------------------------------------------------------------------------------------------------------------------------------------------------------------------------------------------------------------------------------------------------------------------------------------------------------------------------------------------------------------------------------------------------------------------------------------------------------------------------------------------------------------------------------------------------------------------------------------------------------------------------------------------------------------------------------------------------------------------------------------------------------------------------------------------------------------------------------------------------------------------------------------------------------------------|
| Information Processing | on                       | signaling pathway                       |          |    |     |             | 0000021025 ENSMUSG00000036526 ENSMUSG00000002983 ENSMUSG00000007659 ENSMUSG00000030742 ENSMUSG000000052889 ENSMUSG000000015312                                                                                                                                                                                                                                                                                                                                                                                                                                                                                                                                                                                                                                                                                                                                                                                                                                                                                                                                                                                                                                                                                                                                                                                                                                                                                                                                                                                                                            |
| Metabolism             | Lipid metabolism         | Biosynthesis of unsaturated fatty acids | mmu01040 | 7  | 28  | 8.9664E-05  | ENSMUSG00000028937 ENSMUSG000000072949 ENSMUSG000000063275 ENSMUSG000000028497 ENSMUSG00000020777 ENSMUSG000000021226 ENSMUSG00000025745 ENSMUSG000000031543 ENSMUSG000000030170 ENSMUSG000000025351 ENSMUSG000000041417 ENSMUSG000000022831 ENSMUSG000000036446 ENSMUSG000000031628 ENSMUSG000000027995 ENSMUSG000000017737 ENSMUSG000000023067 ENSMUSG000000022817 ENSMUSG000000029661 ENSMUSG000000015957 ENSMUSG000000031740 ENSMUSG000000057897 ENSMUSG000000092368 ENSMUSG000000029580 ENSMUSG000000052889 ENSMUSG000000001506 ENSMUSG000000033318 ENSMUSG000000083816 ENSMUSG000000024087 ENSMUSG000000030711 ENSMUSG000000026688 ENSMUSG000000027890 ENSMUSG000000058135 ENSMUSG000000008540 ENSMUSG000000030483 ENSMUSG000000074207 ENSMUSG000000032315 ENSMUSG000000038776 ENSMUSG000000032766 ENSMUSG000000031340 ENSMUSG000000031343 ENSMUSG000000023439 ENSMUSG000000027669 ENSMUSG000000022994 ENSMUSG000000031659 ENSMUSG000000027523 ENSMUSG000000075270 ENSMUSG000000052889 ENSMUSG000000019990 ENSMUSG000000063594 ENSMUSG000000063275 ENSMUSG000000018574 ENSMUSG000000026003 ENSMUSG000000059447 ENSMUSG000000028497 ENSMUSG000000020777 ENSMUSG000000036880 ENSMUSG000000024900 ENSMUSG000000025745 ENSMUSG000000035064 ENSMUSG000000083816 ENSMUSG000000041417 ENSMUSG000000022994 ENSMUSG000000039145 ENSMUSG000000023067 ENSMUSG000000031659 ENSMUSG000000044216 ENSMUSG000000026407 ENSMUSG000000057897 ENSMUSG000000015968 ENSMUSG000000044951 ENSMUSG0000000029580 ENSMUSG000000052889 ENSMUSG000000042529 ENSMUSG000000027523 |
| Human Diseases         | Cancers: Overview        | Proteoglycans in cancer                 | mmu05205 | 19 | 208 | 0.000106601 |                                                                                                                                                                                                                                                                                                                                                                                                                                                                                                                                                                                                                                                                                                                                                                                                                                                                                                                                                                                                                                                                                                                                                                                                                                                                                                                                                                                                                                                                                                                                                           |
| Human Diseases         | Cancers: Overview        | Chemical carcinogenesis                 | mmu05204 | 12 | 93  | 0.00011137  |                                                                                                                                                                                                                                                                                                                                                                                                                                                                                                                                                                                                                                                                                                                                                                                                                                                                                                                                                                                                                                                                                                                                                                                                                                                                                                                                                                                                                                                                                                                                                           |
| Human Diseases         | Substance dependence     | Morphine addiction                      | mmu05032 | 12 | 93  | 0.00011137  |                                                                                                                                                                                                                                                                                                                                                                                                                                                                                                                                                                                                                                                                                                                                                                                                                                                                                                                                                                                                                                                                                                                                                                                                                                                                                                                                                                                                                                                                                                                                                           |
| Metabolism             | Global and overview maps | Fatty acid metabolism                   | mmu01212 | 9  | 52  | 0.000111512 |                                                                                                                                                                                                                                                                                                                                                                                                                                                                                                                                                                                                                                                                                                                                                                                                                                                                                                                                                                                                                                                                                                                                                                                                                                                                                                                                                                                                                                                                                                                                                           |
| Organismal Systems     | Endocrine system         | Oxytocin signaling pathway              | mmu04921 | 16 | 158 | 0.00012366  |                                                                                                                                                                                                                                                                                                                                                                                                                                                                                                                                                                                                                                                                                                                                                                                                                                                                                                                                                                                                                                                                                                                                                                                                                                                                                                                                                                                                                                                                                                                                                           |

|                                      |                       |                                |           |    |     |             |                                                                                                                                                                                                                                                                                                                                                                                                                                    |
|--------------------------------------|-----------------------|--------------------------------|-----------|----|-----|-------------|------------------------------------------------------------------------------------------------------------------------------------------------------------------------------------------------------------------------------------------------------------------------------------------------------------------------------------------------------------------------------------------------------------------------------------|
| Cellular Processes                   | Cell growth and death | p53 signaling pathway          | mmu 04115 | 10 | 68  | 0.000157534 | ENSMUSG000000036390 ENSMUSG000000026029 ENSMUSG000000037411 ENSMUSG000000023067 ENSMUSG000000020427 ENSMUSG000000026389 ENSMUSG00000019851 ENSMUSG000000031628 ENSMUSG000000015312 ENSMUSG00000029521                                                                                                                                                                                                                              |
|                                      |                       |                                |           |    |     |             | ENSMUSG000000042826 ENSMUSG000000056917 ENSMUSG000000041417 ENSMUSG000000024621 ENSMUSG000000033220 ENSMUSG000000052889 ENSMUSG000000027523 ENSMUSG000000050147 ENSMUSG000000031659 ENSMUSG00000027954 ENSMUSG000000030742 ENSMUSG000000005672 ENSMUSG000000068036 ENSMUSG000000071042 ENSMUSG000000038668 ENSMUSG000000022523 ENSMUSG000000022994 ENSMUSG000000029580 ENSMUSG000000031520                                         |
| Environmental Information Processing | Signal transduction   | Rap1 signaling pathway         | mmu 04015 | 19 | 215 | 0.000158479 | ENSMUSG000000032766 ENSMUSG000000041417 ENSMUSG000000023439 ENSMUSG000000027669 ENSMUSG000000022994 ENSMUSG000000031659 ENSMUSG000000044216 ENSMUSG000000026407 ENSMUSG000000057897 ENSMUSG00000015968 ENSMUSG000000052889 ENSMUSG000000042529 ENSMUSG000000063594                                                                                                                                                                 |
| Organismal Systems                   | Nervous system        | Cholinergic synapse            | mmu 04725 | 13 | 113 | 0.000167123 | ENSMUSG000000042826 ENSMUSG000000036390 ENSMUSG000000024112 ENSMUSG000000031530 ENSMUSG000000033220 ENSMUSG000000061288 ENSMUSG00000015968 ENSMUSG000000028862 ENSMUSG000000027347 ENSMUSG000000022523 ENSMUSG000000026407 ENSMUSG000000020866 ENSMUSG000000037337 ENSMUSG000000002983 ENSMUSG000000031506 ENSMUSG000000071042 ENSMUSG000000031628 ENSMUSG000000026074 ENSMUSG000000052889 ENSMUSG000000026073 ENSMUSG000000015312 |
| Environmental Information Processing | Signal transduction   | MAPK signaling pathway         | mmu 04010 | 21 | 254 | 0.000173409 | ENSMUSG000000037649 ENSMUSG000000024610 ENSMUSG000000037548 ENSMUSG000000036594 ENSMUSG000000060586 ENSMUSG000000055413 ENSMUSG000000038642 ENSMUSG000000079547 ENSMUSG000000076617 ENSMUSG000000073421 ENSMUSG000000053977 ENSMUSG000000022504                                                                                                                                                                                    |
| Organismal Systems                   | Immune system         | Antigen presentation           | mmu 04612 | 12 | 98  | 0.000174072 | ENSMUSG000000022186 ENSMUSG000000026687 ENSMUSG000000027875 ENSMUSG000000059447 ENSMUSG000000057880 ENSMUSG000000025745 ENSMUSG000000063558 ENSMUSG000000024903 ENSMUSG000000036880                                                                                                                                                                                                                                                |
| Metabolism                           | Amino acid metabolism | Valine, leucine and isoleucine | mmu 00280 | 9  | 56  | 0.000183868 |                                                                                                                                                                                                                                                                                                                                                                                                                                    |

|                    |                                 |                                          |          |    |     |             |                                                                                                                                                                                                                                                                                             |
|--------------------|---------------------------------|------------------------------------------|----------|----|-----|-------------|---------------------------------------------------------------------------------------------------------------------------------------------------------------------------------------------------------------------------------------------------------------------------------------------|
|                    |                                 | e<br>degradat<br>ion<br>Hypertro<br>phic |          |    |     |             | ENSMUSG00000053093 ENSMUSG00000026407 ENSMUSG00000022817 ENSMUSG000000042284 ENSMUSG00000026971 ENSMUSG00000015968 ENSMUSG00000039115 ENSMUSG00000001281 ENSMUSG00000029580 ENSMUSG00000027111 ENSMUSG00000031799                                                                           |
| Human Diseases     | Cardiovascular diseases         | cardiomyopathy (HCM)                     | mmu05410 | 11 | 84  | 0.000189313 |                                                                                                                                                                                                                                                                                             |
| Metabolism         | Metabolism of other amino acids | Glutathione metabolism                   | mmu00480 | 9  | 57  | 0.000207053 | ENSMUSG00000033318 ENSMUSG00000030541 ENSMUSG00000027890 ENSMUSG00000006344 ENSMUSG00000026688 ENSMUSG00000058135 ENSMUSG0000008540 ENSMUSG00000011179 ENSMUSG00000032350                                                                                                                   |
| Human Diseases     | Immune diseases                 | Rheumatoid arthritis                     | mmu05323 | 11 | 85  | 0.000207849 | ENSMUSG00000037649 ENSMUSG00000037548 ENSMUSG00000027995 ENSMUSG00000036594 ENSMUSG00000060586 ENSMUSG00000043613 ENSMUSG0000079547 ENSMUSG00000076617 ENSMUSG00000039347 ENSMUSG00000073421 ENSMUSG00000033793                                                                             |
| Organismal Systems | Endocrine system                | Insulin secretion                        | mmu04911 | 11 | 86  | 0.000227897 | ENSMUSG00000031840 ENSMUSG00000022994 ENSMUSG00000096146 ENSMUSG00000026407 ENSMUSG00000031659 ENSMUSG00000057897 ENSMUSG0000015968 ENSMUSG00000027523 ENSMUSG00000033161 ENSMUSG00000052889 ENSMUSG00000028645                                                                             |
| Organismal Systems | Circulatory system              | Adrenergic signaling in cardiomyocytes   | mmu04261 | 15 | 152 | 0.000257    | ENSMUSG00000041417 ENSMUSG00000061086 ENSMUSG00000029120 ENSMUSG00000026407 ENSMUSG00000032511 ENSMUSG00000031659 ENSMUSG0000053093 ENSMUSG00000057897 ENSMUSG00000015968 ENSMUSG00000063889 ENSMUSG00000027523 ENSMUSG00000033161 ENSMUSG00000022994 ENSMUSG00000049115 ENSMUSG00000031799 |
| Organismal Systems | Digestive system                | Pancreatic secretion                     | mmu04972 | 12 | 103 | 0.000264714 | ENSMUSG00000027999 ENSMUSG00000056025 ENSMUSG00000019066 ENSMUSG00000022994 ENSMUSG00000060961 ENSMUSG00000031659 ENSMUSG0000041193 ENSMUSG00000041202 ENSMUSG00000020788 ENSMUSG00000027523 ENSMUSG00000033161 ENSMUSG00000052889                                                          |
| Human              | Cardiovascular                  | Arrhythmia                               | mmu      | 10 | 74  | 0.00029     | ENSMUSG00000022817 ENSMUSG00000026407 ENSMUSG00000027985 ENSMUSG00000000000                                                                                                                                                                                                                 |

|                    |                                           |                                                                     |           |    |     |              |                                                                                                                                                                                                                                                     |
|--------------------|-------------------------------------------|---------------------------------------------------------------------|-----------|----|-----|--------------|-----------------------------------------------------------------------------------------------------------------------------------------------------------------------------------------------------------------------------------------------------|
| Diseases           | ular diseases                             | mogenic right ventricular cardiomyopathy (ARVC) Fc gamma R-mediated | 05412     |    |     | 2067         | USG00000042284 ENSMUSG00000026971 ENSMUSG00000015968 ENSMUSG0000039115 ENSMUSG00000001281 ENSMUSG00000029580 ENSMUSG00000027111                                                                                                                     |
| Organismal Systems | Immune system                             | phagocytosis Primary immunity                                       | mmu 04666 | 11 | 90  | 0.00032 5232 | ENSMUSG00000069662 ENSMUSG00000041417 ENSMUSG00000026288 ENSMUSG00000046993 ENSMUSG00000036995 ENSMUSG00000033220 ENSMUSG0000003283 ENSMUSG00000030742 ENSMUSG00000052889 ENSMUSG00000020143 ENSMUSG00000015947                                     |
| Human Diseases     | Immune diseases                           | deficiency                                                          | mmu 05340 | 7  | 37  | 0.00040 0097 | ENSMUSG00000031264 ENSMUSG00000000409 ENSMUSG00000061132 ENSMUSG00000029591 ENSMUSG00000010142 ENSMUSG00000053977 ENSMUSG00000022504                                                                                                                |
| Human Diseases     | Endocrine and metabolic diseases          | Insulin resistance                                                  | mmu 04931 | 12 | 111 | 0.00049 1942 | ENSMUSG00000031808 ENSMUSG00000033871 ENSMUSG00000041417 ENSMUSG00000022383 ENSMUSG00000042010 ENSMUSG00000055980 ENSMUSG0000033083 ENSMUSG00000021025 ENSMUSG00000046794 ENSMUSG00000052889 ENSMUSG00000024900 ENSMUSG00000028645                  |
| Metabolism         | Xenobiotics biodegradation and metabolism | Metabolism of xenobiotics by cytochrome P450                        | mmu 00980 | 9  | 65  | 0.00049 4966 | ENSMUSG00000033318 ENSMUSG00000027890 ENSMUSG00000024087 ENSMUSG00000074207 ENSMUSG00000026688 ENSMUSG00000058135 ENSMUSG0000008540 ENSMUSG00000032315 ENSMUSG00000038776                                                                           |
| Organismal Systems | Circulatory system                        | Vascular smooth muscle contractile                                  | mmu 04270 | 13 | 128 | 0.00050 4068 | ENSMUSG00000027523 ENSMUSG00000027999 ENSMUSG00000041193 ENSMUSG00000022994 ENSMUSG00000031659 ENSMUSG00000026407 ENSMUSG0000041202 ENSMUSG00000086451 ENSMUSG00000015968 ENSMUSG00000044951 ENSMUSG00000052889 ENSMUSG00000049115 ENSMUSG000000410 |

|            |            |           |       |    |         |                                                                 |                                                               |
|------------|------------|-----------|-------|----|---------|-----------------------------------------------------------------|---------------------------------------------------------------|
|            |            | on        |       |    |         | 46                                                              |                                                               |
|            |            | Cardiac   |       |    |         | ENSMUSG00000061086 ENSMUSG00000053093 ENSMUSG00000026407 ENSM   |                                                               |
|            |            | muscle    |       |    |         | USG000000101249 ENSMUSG00000051811 ENSMUSG000000102070 ENSMUSG0 |                                                               |
| Organismal | Circulator | contracti | mmu   |    | 0.00051 | 0000015968 ENSMUSG00000033161 ENSMUSG000000101111 ENSMUSG000000 |                                                               |
| Systems    | y system   | on        | 04260 | 10 | 1475    | 031799                                                          |                                                               |
|            | Xenobiotic |           |       |    |         |                                                                 |                                                               |
|            | s          | Drug      |       |    |         |                                                                 |                                                               |
|            | biodegrad  | metaboli  |       |    |         |                                                                 |                                                               |
|            | ation and  | sm -      |       |    |         | ENSMUSG00000028088 ENSMUSG00000033318 ENSMUSG00000040170 ENSM   |                                                               |
|            | metabolis  | cytochro  | mmu   |    | 0.00060 | USG00000074207 ENSMUSG00000026688 ENSMUSG00000027890 ENSMUSG0   |                                                               |
| Metabolism | m          | me P450   | 00982 | 9  | 357     | 0000058135 ENSMUSG00000008540 ENSMUSG00000063558                |                                                               |
|            |            |           |       |    |         | ENSMUSG00000032766 ENSMUSG00000019828 ENSMUSG00000023439 ENSM   |                                                               |
|            |            | Glutamat  |       |    |         | USG00000026473 ENSMUSG00000022994 ENSMUSG00000001985 ENSMUSG0   |                                                               |
| Organismal | Nervous    | ergic     | mmu   |    | 0.00065 | 0000031659 ENSMUSG00000027669 ENSMUSG00000015968 ENSMUSG000000  |                                                               |
| Systems    | system     | synapse   | 04724 | 12 | 6523    | 027523 ENSMUSG00000052889 ENSMUSG00000063594                    |                                                               |
|            | Transport  |           |       |    |         | ENSMUSG00000024066 ENSMUSG00000030541 ENSMUSG00000053898 ENSM   |                                                               |
|            | and        |           |       |    |         | USG00000027187 ENSMUSG00000022040 ENSMUSG00000022210 ENSMUSG0   |                                                               |
| Cellular   | catabolis  | Peroxiso  | mmu   |    | 0.00066 | 0000026853 ENSMUSG00000020777 ENSMUSG00000020826 ENSMUSG000000  |                                                               |
| Processes  | m          | me        | 04146 | 10 | 4197    | 022982                                                          |                                                               |
|            |            | Thyroid   |       |    |         | ENSMUSG00000020937 ENSMUSG00000041417 ENSMUSG00000026799 ENSM   |                                                               |
|            |            | hormone   |       |    |         | USG000000007682 ENSMUSG00000033083 ENSMUSG00000026104 ENSMUSG0  |                                                               |
| Organismal | Endocrine  | signaling | mmu   |    | 0.00075 | 0000029580 ENSMUSG00000028645 ENSMUSG00000052889 ENSMUSG000000  |                                                               |
| Systems    | system     | pathway   | 04919 | 12 | 4727    | 033161 ENSMUSG00000034297 ENSMUSG00000038622                    |                                                               |
|            |            |           |       |    |         | ENSMUSG00000031808 ENSMUSG00000022383 ENSMUSG00000026003 ENSM   |                                                               |
|            |            | PPAR      |       |    |         | USG00000027875 ENSMUSG00000002289 ENSMUSG00000002831 ENSMUSG0   |                                                               |
| Organismal | Endocrine  | signaling | mmu   |    | 0.00078 | 0000011305 ENSMUSG00000020777 ENSMUSG00000028773 ENSMUSG000000  |                                                               |
| Systems    | system     | pathway   | 03320 | 10 | 5527    | 024900                                                          |                                                               |
|            | Cancers:   | Acute     |       |    |         | ENSMUSG00000041417 ENSMUSG00000002111 ENSMUSG00000027985 ENSM   |                                                               |
| Human      | Specific   | myeloid   | mmu   |    | 0.00092 | USG000000031490 ENSMUSG00000031155 ENSMUSG00000022952 ENSMUSG0  |                                                               |
| Diseases   | types      | leukemia  | 05221 | 8  | 8978    | 0000066687 ENSMUSG00000005672                                   |                                                               |
| Organismal | Endocrine  | Regulatio | mmu   | 8  | 57      | 0.00092                                                         | ENSMUSG00000083816 ENSMUSG00000041417 ENSMUSG00000055980 ENSM |

|                    |                       |                                   |           |    |     |             |                                                                                                                                                                                                                                                       |
|--------------------|-----------------------|-----------------------------------|-----------|----|-----|-------------|-------------------------------------------------------------------------------------------------------------------------------------------------------------------------------------------------------------------------------------------------------|
| Systems            | system                | n of lipolysis in adipocytes      | 04923     |    |     | 8978        | USG00000031659 ENSMUSG00000047250 ENSMUSG00000027523 ENSMUSG0000022994 ENSMUSG00000025509                                                                                                                                                             |
|                    | Environmental         |                                   |           |    |     |             |                                                                                                                                                                                                                                                       |
| Organismal Systems | adaptation            | Circadian rhythm                  | mmu 04710 | 6  | 31  | 0.000935253 | ENSMUSG00000055866 ENSMUSG00000020889 ENSMUSG00000068742 ENSMUSG00000030256 ENSMUSG00000055116 ENSMUSG00000020893                                                                                                                                     |
|                    |                       | Graft-versus-host disease         |           |    |     |             | ENSMUSG00000037649 ENSMUSG00000037548 ENSMUSG00000036594 ENSMUSG00000060586 ENSMUSG00000055413 ENSMUSG00000033024 ENSMUSG0000079547 ENSMUSG00000076617 ENSMUSG00000073421                                                                             |
| Human Diseases     | Immune diseases       |                                   | mmu 05332 | 9  | 72  | 0.000962251 | ENSMUSG00000022994 ENSMUSG00000031790 ENSMUSG00000059456 ENSMUSG00000031659 ENSMUSG00000031740 ENSMUSG00000026407 ENSMUSG0000057897 ENSMUSG00000015968 ENSMUSG00000027523 ENSMUSG00000052889                                                          |
| Organismal Systems | Endocrine system      | GnRH signaling pathway            | mmu 04912 | 10 | 88  | 0.001001215 | ENSMUSG00000043091 ENSMUSG00000036390 ENSMUSG00000041417 ENSMUSG00000024590 ENSMUSG00000030560 ENSMUSG00000015312 ENSMUSG0000007659 ENSMUSG00000021025 ENSMUSG00000038642 ENSMUSG00000029580 ENSMUSG00000031628 ENSMUSG00000024910 ENSMUSG00000026029 |
| Cellular Processes | Cell growth and death | Apoptosis                         | mmu 04210 | 13 | 139 | 0.001020881 | ENSMUSG00000026675 ENSMUSG00000083816 ENSMUSG00000024087 ENSMUSG00000031659 ENSMUSG00000027523 ENSMUSG00000021226 ENSMUSG0000032315 ENSMUSG00000022994                                                                                                |
| Organismal Systems | Endocrine system      | Ovarian steroidogenesis           | mmu 04913 | 8  | 58  | 0.001028553 | ENSMUSG00000020395 ENSMUSG00000005763 ENSMUSG00000041417 ENSMUSG00000000409 ENSMUSG00000032475 ENSMUSG00000066877 ENSMUSG0000021025 ENSMUSG00000036526 ENSMUSG00000030742 ENSMUSG00000053977 ENSMUSG00000027347                                       |
| Organismal Systems | Immune system         | T cell receptor signaling pathway | mmu 04660 | 11 | 105 | 0.001053924 | ENSMUSG00000021638 ENSMUSG00000022831 ENSMUSG00000028906 ENSMUSG00000029120 ENSMUSG00000020900 ENSMUSG00000020782 ENSMUSG0000097652 ENSMUSG00000053093 ENSMUSG00000068036 ENSMUSG00000000000                                                          |
| Cellular Processes | Cellular community -  | Tight junction                    | mmu 04530 | 13 | 141 | 0.001151162 |                                                                                                                                                                                                                                                       |



|             |            |           |       |    |     |         |                                                                  |
|-------------|------------|-----------|-------|----|-----|---------|------------------------------------------------------------------|
|             | eukaryote  |           |       |    |     |         | 029580 ENSMUSG000000052889 ENSMUSG000000022443 ENSMUSG0000000017 |
|             | s          |           |       |    |     |         | 39                                                               |
|             | Endocrine  |           |       |    |     |         |                                                                  |
|             | and        | Type I    |       |    |     |         | ENSMUSG000000037649 ENSMUSG000000037548 ENSMUSG000000036594 ENSM |
| Human       | metabolic  | diabetes  | mmu   |    |     | 0.00147 | USG000000060586 ENSMUSG000000055413 ENSMUSG000000079547 ENSMUSGO |
| Diseases    | diseases   | mellitus  | 04940 | 9  | 77  | 7046    | 0000076617 ENSMUSG000000073421 ENSMUSG000000026204               |
|             |            |           |       |    |     |         | ENSMUSG000000041417 ENSMUSG000000059456 ENSMUSG000000027995 ENSM |
|             |            |           |       |    |     |         | USG000000017737 ENSMUSG000000023067 ENSMUSG000000056130 ENSMUSGO |
| Human       | Infectious | Hepatitis | mmu   |    |     | 0.00153 | 0000026029 ENSMUSG000000040033 ENSMUSG000000026104 ENSMUSG000000 |
| Diseases    | diseases:  | B         | 05161 | 13 | 146 | 8625    | 021025 ENSMUSG000000031628 ENSMUSG000000052889 ENSMUSG0000000268 |
|             | Viral      |           |       |    |     |         | 96                                                               |
|             |            | Fructose  |       |    |     |         |                                                                  |
|             | Carbohydr  | and       |       |    |     |         |                                                                  |
|             | ate        | mannose   |       |    |     |         |                                                                  |
| Metabolism  | metabolis  | metaboli  | mmu   |    |     | 0.00162 | ENSMUSG000000025648 ENSMUSG000000027227 ENSMUSG000000038028 ENSM |
| Environmen  | m          | sm        | 00051 | 6  | 35  | 6927    | USG000000021456 ENSMUSG000000029162 ENSMUSG000000026773          |
| tal         |            |           |       |    |     |         | ENSMUSG000000048756 ENSMUSG000000035064 ENSMUSG000000041417 ENSM |
| Information | Signal     | AMPK      |       |    |     |         | USG000000042010 ENSMUSG000000029120 ENSMUSG000000025648 ENSMUSGO |
| Processing  | transducti | signaling | mmu   |    |     | 0.00163 | 0000055980 ENSMUSG000000021456 ENSMUSG000000031490 ENSMUSG000000 |
| Environmen  | on         | pathway   | 04152 | 12 | 129 | 6744    | 017950 ENSMUSG000000024900 ENSMUSG000000026773                   |
| tal         |            |           |       |    |     |         | ENSMUSG000000083816 ENSMUSG000000021277 ENSMUSG000000041417 ENSM |
| Information | Signal     | TNF       |       |    |     |         | USG000000043613 ENSMUSG000000017737 ENSMUSG000000026029 ENSMUSGO |
| Processing  | transducti | signaling | mmu   |    |     | 0.00169 | 0000031790 ENSMUSG000000021025 ENSMUSG000000031628 ENSMUSG000000 |
|             | on         | pathway   | 04668 | 11 | 112 | 7372    | 091514 ENSMUSG000000028599                                       |
|             |            | Arginine  |       |    |     |         |                                                                  |
|             | Amino      | and       |       |    |     |         |                                                                  |
|             | acid       | proline   |       |    |     |         | ENSMUSG000000026687 ENSMUSG000000069835 ENSMUSG000000025190 ENSM |
| Metabolism  | metabolis  | metaboli  | mmu   |    |     | 0.00215 | USG000000019916 ENSMUSG000000011179 ENSMUSG000000001270 ENSMUSGO |
| Environmen  | m          | sm        | 00330 | 7  | 51  | 0767    | 0000020826                                                       |
| tal         | Signal     | FoxO      | mmu   |    |     | 0.00232 | ENSMUSG000000048756 ENSMUSG000000019828 ENSMUSG000000036390 ENSM |
|             | transducti | signaling | 04068 | 12 | 135 | 486     | USG000000041417 ENSMUSG000000027187 ENSMUSG000000019970 ENSMUSGO |

|                                               |                                 |                        |          |    |     |             |                                                                                                                                                                                                                                                                                                                                                                                                                |
|-----------------------------------------------|---------------------------------|------------------------|----------|----|-----|-------------|----------------------------------------------------------------------------------------------------------------------------------------------------------------------------------------------------------------------------------------------------------------------------------------------------------------------------------------------------------------------------------------------------------------|
| Information Processing                        | on                              | pathway                |          |    |     |             | 0000078566 ENSMUSG00000055980 ENSMUSG00000023067 ENSMUSG00000025422 ENSMUSG00000097675 ENSMUSG00000015312                                                                                                                                                                                                                                                                                                      |
|                                               | Cellular community - eukaryotes | Gap junction           | mmu04540 | 9  | 86  | 0.002944407 | ENSMUSG00000043091 ENSMUSG00000019828 ENSMUSG00000027523 ENSMUSG000000052889 ENSMUSG00000031659 ENSMUSG000000058672 ENSMUSG00000038668 ENSMUSG00000062591 ENSMUSG00000022994                                                                                                                                                                                                                                   |
|                                               | Carbohydrate metabolism         | Butanoate metabolism   | mmu00650 | 5  | 27  | 0.002956437 | ENSMUSG00000022186 ENSMUSG00000057880 ENSMUSG00000030972 ENSMUSG00000025745 ENSMUSG00000027875                                                                                                                                                                                                                                                                                                                 |
|                                               | Amino acid metabolism           | Tyrosine metabolism    | mmu00350 | 6  | 40  | 0.00296975  | ENSMUSG00000074207 ENSMUSG00000033307 ENSMUSG00000025190 ENSMUSG00000000326 ENSMUSG00000063558 ENSMUSG00000024903 ENSMUSG00000086451 ENSMUSG00000041417 ENSMUSG00000022383 ENSMUSG00000033220 ENSMUSG00000026407 ENSMUSG00000015968 ENSMUSG00000031659 ENSMUSG00000020777 ENSMUSG00000057897 ENSMUSG00000068036 ENSMUSG00000021025 ENSMUSG00000027523 ENSMUSG00000033161 ENSMUSG00000020331 ENSMUSG00000022994 |
| Environmental Information Processing          | Signal transduction             | cAMP signaling pathway | mmu04024 | 15 | 198 | 0.003047305 | ENSMUSG00000005763 ENSMUSG00000041417 ENSMUSG00000029120 ENSMUSG00000027995 ENSMUSG00000020826 ENSMUSG00000022965 ENSMUSG00000021025 ENSMUSG00000027523 ENSMUSG00000037411 ENSMUSG00000026029                                                                                                                                                                                                                  |
| Human Diseases                                | Infectious diseases: Parasitic  | trypanosomiasis)       | mmu05142 | 10 | 104 | 0.003116019 |                                                                                                                                                                                                                                                                                                                                                                                                                |
| Environmental Information Processing Cellular | Signal transduction             | ErbB signaling pathway | mmu04012 | 9  | 87  | 0.00316079  | ENSMUSG00000041417 ENSMUSG00000032475 ENSMUSG00000023067 ENSMUSG000000066877 ENSMUSG00000031490 ENSMUSG00000062991 ENSMUSG00000057897 ENSMUSG00000052889 ENSMUSG00000060275                                                                                                                                                                                                                                    |
|                                               | Transport                       | Lysosomes              | mmu      | 11 | 124 | 0.00352     | ENSMUSG00000029426 ENSMUSG00000028164 ENSMUSG00000031903 ENSM                                                                                                                                                                                                                                                                                                                                                  |

|                                      |                     |                                   |           |    |     |              |                                                                                                                                                                                                                                   |
|--------------------------------------|---------------------|-----------------------------------|-----------|----|-----|--------------|-----------------------------------------------------------------------------------------------------------------------------------------------------------------------------------------------------------------------------------|
| Processes                            | and catabolism      | e                                 | 04142     |    |     | 192          | USG00000026177 ENSMUSG00000028581 ENSMUSG00000024910 ENSMUSG0000038642 ENSMUSG00000020604 ENSMUSG00000025351 ENSMUSG0000030560 ENSMUSG00000033793                                                                                 |
| Human Diseases                       | Immune diseases     | Allograft rejection               | mmu 05330 | 8  | 72  | 0.00354 2564 | ENSMUSG00000037649 ENSMUSG00000037548 ENSMUSG00000036594 ENSMUSG00000060586 ENSMUSG00000055413 ENSMUSG00000079547 ENSMUSG0000076617 ENSMUSG00000073421                                                                            |
| Organismal Systems                   | Endocrine system    | Renin secretion                   | mmu 04924 | 8  | 72  | 0.00354 2564 | ENSMUSG00000056025 ENSMUSG00000026407 ENSMUSG00000086451 ENSMUSG00000015968 ENSMUSG00000027523 ENSMUSG00000031980 ENSMUSG0000022994 ENSMUSG00000049115                                                                            |
| Organismal Systems                   | Digestive system    | Gastric acid secretion            | mmu 04971 | 8  | 73  | 0.00382 5338 | ENSMUSG00000022994 ENSMUSG00000031659 ENSMUSG00000057897 ENSMUSG00000027523 ENSMUSG00000044951 ENSMUSG00000029580 ENSMUSG0000052889 ENSMUSG00000033161                                                                            |
| Environmental Information Processing | Signal transduction | Phospholipase D signaling pathway | mmu 04072 | 12 | 146 | 0.00419 0783 | ENSMUSG00000019828 ENSMUSG00000041417 ENSMUSG00000022994 ENSMUSG00000018008 ENSMUSG00000031659 ENSMUSG00000059456 ENSMUSG0000038668 ENSMUSG00000058715 ENSMUSG00000026180 ENSMUSG0000005672 ENSMUSG00000049115 ENSMUSG00000027523 |
| Metabolism                           | Lipid metabolism    | lipid metabolism                  | mmu 00564 | 9  | 94  | 0.00504 7723 | ENSMUSG00000024843 ENSMUSG00000038732 ENSMUSG00000027999 ENSMUSG00000023019 ENSMUSG00000041193 ENSMUSG00000031903 ENSMUSG0000029330 ENSMUSG00000041202 ENSMUSG00000021608                                                         |
| Organismal Systems                   | Nervous system      | Dopaminergic synapse              | mmu 04728 | 11 | 135 | 0.00633 4589 | ENSMUSG00000032766 ENSMUSG00000023439 ENSMUSG00000029120 ENSMUSG00000000326 ENSMUSG00000027669 ENSMUSG00000057897 ENSMUSG0000015968 ENSMUSG00000055116 ENSMUSG00000027523 ENSMUSG00000052889 ENSMUSG00000063594                   |
| Organismal Systems                   | Aging               | Longevity regulating pathway      | mmu 04213 | 7  | 64  | 0.00671 3779 | ENSMUSG00000048756 ENSMUSG00000041417 ENSMUSG00000027187 ENSMUSG00000055980 ENSMUSG00000031659 ENSMUSG00000022994 ENSMUSG0000022982                                                                                               |

|                                      |                                     |                                                                         |           |    |     |              |                                                                                                                                                                                                                                                                                                                                                      |
|--------------------------------------|-------------------------------------|-------------------------------------------------------------------------|-----------|----|-----|--------------|------------------------------------------------------------------------------------------------------------------------------------------------------------------------------------------------------------------------------------------------------------------------------------------------------------------------------------------------------|
|                                      |                                     | multiple species                                                        |           |    |     |              |                                                                                                                                                                                                                                                                                                                                                      |
| Environmental Information Processing | Signal transduction                 | mTOR signaling pathway                                                  | mmu 04150 | 12 | 156 | 0.00678 5562 | ENSMUSG00000030170 ENSMUSG00000041417 ENSMUSG00000020176 ENSMUSG00000010095 ENSMUSG00000019970 ENSMUSG00000055980 ENSMUSG0000031490 ENSMUSG00000015957 ENSMUSG00000092368 ENSMUSG00000020108 ENSMUSG00000052889 ENSMUSG00000033793                                                                                                                   |
| Organismal Systems                   | Endocrine system                    | Melanogenesis EGFR tyrosine kinase inhibitor resistance: Antineoplastic | mmu 04916 | 9  | 99  | 0.00685 9459 | ENSMUSG00000030170 ENSMUSG00000022994 ENSMUSG00000005672 ENSMUSG00000027985 ENSMUSG00000031659 ENSMUSG00000015957 ENSMUSG0000057897 ENSMUSG00000027523 ENSMUSG00000052889                                                                                                                                                                            |
| Human Diseases                       | Drug resistance: Antineoplastic     | Neuroactive ligand-receptor interaction                                 | mmu 01521 | 8  | 82  | 0.00722 2058 | ENSMUSG00000048756 ENSMUSG00000041417 ENSMUSG00000031490 ENSMUSG00000062991 ENSMUSG00000007659 ENSMUSG00000092368 ENSMUSG0000052889 ENSMUSG00000060275                                                                                                                                                                                               |
| Environmental Information Processing | Signaling molecules and interaction | Toll-like receptor signaling pathway                                    | mmu 04080 | 18 | 285 | 0.00748 0991 | ENSMUSG00000048779 ENSMUSG00000019828 ENSMUSG00000023132 ENSMUSG00000031340 ENSMUSG00000031343 ENSMUSG00000032492 ENSMUSG0000022041 ENSMUSG00000034009 ENSMUSG00000050147 ENSMUSG00000044338 ENSMUSG00000032860 ENSMUSG00000043895 ENSMUSG00000034881 ENSMUSG00000086451 ENSMUSG00000038668 ENSMUSG00000056529 ENSMUSG00000001985 ENSMUSG00000049115 |
| Organismal Systems                   | Immune system                       | Infectious diseases: Viral                                              | mmu 04620 | 9  | 101 | 0.00770 9376 | ENSMUSG00000029771 ENSMUSG00000029417 ENSMUSG00000041417 ENSMUSG00000027995 ENSMUSG00000021277 ENSMUSG00000056130 ENSMUSG0000026104 ENSMUSG00000021025 ENSMUSG00000026029                                                                                                                                                                            |
| Human Diseases                       | Signaling molecules                 | Cytokine-cytokine                                                       | mmu 05162 | 11 | 139 | 0.00771 0292 | ENSMUSG00000066861 ENSMUSG00000002325 ENSMUSG00000022965 ENSMUSG00000027995 ENSMUSG00000032690 ENSMUSG00000040033 ENSMUSG0000026104 ENSMUSG00000021025 ENSMUSG00000052776 ENSMUSG00000026896 ENSMUSG00000041417                                                                                                                                      |
| Environmental                        | Signaling molecules                 | Cytokine-cytokine                                                       | mmu 04060 | 17 | 265 | 0.00798 4261 | ENSMUSG00000029417 ENSMUSG00000028444 ENSMUSG00000031520 ENSMUSG00000030745 ENSMUSG00000037157 ENSMUSG00000010142 ENSMUSG00000000000                                                                                                                                                                                                                 |

|                                      |                     |                                         |          |    |     |             |                                                                                                                                                                                                                                     |
|--------------------------------------|---------------------|-----------------------------------------|----------|----|-----|-------------|-------------------------------------------------------------------------------------------------------------------------------------------------------------------------------------------------------------------------------------|
| Information Processing               | and interaction     | receptor interaction                    |          |    |     |             | 0000024621 ENSMUSG00000052336 ENSMUSG00000032089 ENSMUSG00000022965 ENSMUSG00000026073 ENSMUSG00000045382 ENSMUSG00000026180 ENSMUSG00000044337 ENSMUSG00000005672 ENSMUSG00000020676 ENSMUSG00000028599                            |
|                                      |                     | Proximal tubule bicarbonate reclamation | mmu04964 | 4  | 22  | 0.008211243 | ENSMUSG00000025792 ENSMUSG00000060961 ENSMUSG00000033161 ENSMUSG00000000805                                                                                                                                                         |
| Organismal Systems                   | Excretory system    |                                         |          |    |     |             | ENSMUSG00000028444 ENSMUSG00000041417 ENSMUSG00000002325 ENSMUSG00000063558 ENSMUSG00000023067 ENSMUSG00000037157 ENSMUSG00000032089 ENSMUSG00000040033 ENSMUSG00000026104 ENSMUSG00000007659 ENSMUSG00000022965 ENSMUSG00000030745 |
| Environmental Information Processing | Signal transduction | Jak-STAT signaling pathway              | mmu04630 | 12 | 161 | 0.008487866 |                                                                                                                                                                                                                                     |
| Organismal Systems                   | Endocrine system    | Renin-angiotensin system                | mmu04614 | 5  | 36  | 0.008735496 | ENSMUSG00000061119 ENSMUSG00000028024 ENSMUSG00000053719 ENSMUSG00000031980 ENSMUSG00000049115                                                                                                                                      |
|                                      |                     | Autoimmune                              |          |    |     |             | ENSMUSG00000037649 ENSMUSG00000037548 ENSMUSG00000036594 ENSMUSG00000060586 ENSMUSG00000055413 ENSMUSG00000079547 ENSMUSG00000076617 ENSMUSG00000073421                                                                             |
| Human Diseases                       | Immune diseases     | thyroid disease                         | mmu05320 | 8  | 87  | 0.009893284 |                                                                                                                                                                                                                                     |
|                                      |                     | Complement and coagulation cascades     | mmu04610 | 8  | 87  | 0.009893284 | ENSMUSG00000044206 ENSMUSG00000030789 ENSMUSG00000037411 ENSMUSG00000050147 ENSMUSG00000001930 ENSMUSG00000079105 ENSMUSG00000026399 ENSMUSG00000030111                                                                             |
| Organismal Systems                   | Immune system       | Endocrine and other factor-re           | mmu04961 | 6  | 54  | 0.010992145 | ENSMUSG00000022994 ENSMUSG00000032492 ENSMUSG00000053719 ENSMUSG00000027523 ENSMUSG00000033161 ENSMUSG00000052889                                                                                                                   |

|                    |                                      |                                            |           |    |     |             |                                                                                                                                                                                                                 |
|--------------------|--------------------------------------|--------------------------------------------|-----------|----|-----|-------------|-----------------------------------------------------------------------------------------------------------------------------------------------------------------------------------------------------------------|
|                    |                                      | regulated calcium reabsorption             |           |    |     |             |                                                                                                                                                                                                                 |
| Metabolism         | Metabolism of cofactors and vitamins | Retinol metabolism<br>alpha-Linolenic acid | mmu00830  | 8  | 89  | 0.011144954 | ENSMUSG00000013584 ENSMUSG00000074207 ENSMUSG00000022210 ENSMUSG00000005547 ENSMUSG00000030483 ENSMUSG00000063558 ENSMUSG00000032315 ENSMUSG00000056666                                                         |
| Metabolism         | Lipid metabolism                     | Systemic lupus erythematosus               | mmu00592  | 4  | 25  | 0.012117184 | ENSMUSG00000041193 ENSMUSG00000020777 ENSMUSG00000027999 ENSMUSG00000041202                                                                                                                                     |
| Human Diseases     | Immune diseases                      | Parkinson's disease                        | mmu005322 | 11 | 149 | 0.012168512 | ENSMUSG00000037649 ENSMUSG00000037548 ENSMUSG00000068854 ENSMUSG00000036594 ENSMUSG00000060586 ENSMUSG00000079105 ENSMUSG0000015947 ENSMUSG00000079547 ENSMUSG00000076617 ENSMUSG00000073421 ENSMUSG00000093577 |
| Human Diseases     | Neurodegenerative diseases           | Adipocytokine signaling pathway            | mmu005012 | 11 | 149 | 0.012168512 | ENSMUSG00000032596 ENSMUSG00000029223 ENSMUSG00000101111 ENSMUSG00000101249 ENSMUSG00000051811 ENSMUSG00000044285 ENSMUSG0000064367 ENSMUSG00000102070 ENSMUSG00000023826 ENSMUSG00000031628 ENSMUSG00000025428 |
| Organismal Systems | Endocrine system                     | Aldosterone-regulated sodium reabsorption  | mmu004920 | 7  | 73  | 0.012619589 | ENSMUSG00000022383 ENSMUSG00000042010 ENSMUSG00000055980 ENSMUSG00000021025 ENSMUSG00000028645 ENSMUSG00000024900 ENSMUSG0000028599                                                                             |
| Organismal Systems | Excretory system                     |                                            | mmu004960 | 5  | 40  | 0.012861752 | ENSMUSG00000019970 ENSMUSG00000033161 ENSMUSG00000052889 ENSMUSG00000041417 ENSMUSG00000055980                                                                                                                  |

|                                                |                                                    |                                                       |              |    |     |                 |                                                                                                                                                                                                                                                 |
|------------------------------------------------|----------------------------------------------------|-------------------------------------------------------|--------------|----|-----|-----------------|-------------------------------------------------------------------------------------------------------------------------------------------------------------------------------------------------------------------------------------------------|
|                                                |                                                    | tion<br>Fat<br>digestion<br>and                       |              |    |     |                 |                                                                                                                                                                                                                                                 |
| Organismal<br>Systems                          | Digestive<br>system<br>Cellular<br>communit<br>y - | absorpti<br>on                                        | mmu<br>04975 | 5  | 40  | 0.01286<br>1752 | ENSMUSG00000041193 ENSMUSG00000052396 ENSMUSG00000028158 ENSM<br>USG00000041202 ENSMUSG00000027999                                                                                                                                              |
| Cellular<br>Processes                          | eukaryote<br>s                                     | Adheren<br>s<br>junction                              | mmu<br>04520 | 7  | 74  | 0.01345<br>1477 | ENSMUSG00000033220 ENSMUSG00000027985 ENSMUSG00000032012 ENSM<br>USG00000006411 ENSMUSG00000025372 ENSMUSG00000068036 ENSMUSGO<br>0000029580                                                                                                    |
| Environmen<br>tal<br>Information<br>Processing | Signal<br>transducti<br>on                         | Hippo<br>signaling<br>pathway<br>-multiple<br>species | mmu<br>04392 | 4  | 26  | 0.01364<br>248  | ENSMUSG00000042129 ENSMUSG00000036862 ENSMUSG00000027339 ENSM<br>USG00000025239                                                                                                                                                                 |
| Environmen<br>tal<br>Information<br>Processing | Signal<br>transducti<br>on                         | cGMP-PK<br>G<br>signaling<br>pathway                  | mmu<br>04022 | 12 | 173 | 0.01393<br>2619 | ENSMUSG00000041417 ENSMUSG00000053093 ENSMUSG00000026407 ENSM<br>USG00000015968 ENSMUSG00000055980 ENSMUSG00000031659 ENSMUSGO<br>0000086451 ENSMUSG00000020788 ENSMUSG00000044951 ENSMUSG00000<br>033161 ENSMUSG00000022994 ENSMUSG00000049115 |
| Human<br>Diseases                              | Drug<br>resistance:<br>Antineopl<br>astic          | Endocrin<br>e<br>resistanc<br>e                       | mmu<br>01522 | 8  | 95  | 0.01560<br>0811 | ENSMUSG00000041417 ENSMUSG00000017737 ENSMUSG00000023067 ENSM<br>USG00000031659 ENSMUSG00000031740 ENSMUSG00000027523 ENSMUSGO<br>0000014773 ENSMUSG00000022994                                                                                 |
| Organismal<br>Systems                          | Aging                                              | Longevit<br>y<br>regulatin<br>g<br>pathway            | mmu<br>04211 | 8  | 96  | 0.01645<br>2845 | ENSMUSG00000048756 ENSMUSG00000041417 ENSMUSG00000027187 ENSM<br>USG00000055980 ENSMUSG00000031659 ENSMUSG00000031490 ENSMUSGO<br>0000037204 ENSMUSG00000022994                                                                                 |
| Environmen<br>tal                              | Signal<br>transducti                               | Phosphat<br>idylinosit                                | mmu<br>04070 | 8  | 97  | 0.01733<br>7913 | ENSMUSG00000041417 ENSMUSG00000026288 ENSMUSG00000034570 ENSM<br>USG00000020937 ENSMUSG00000024525 ENSMUSG00000025178 ENSMUSGO                                                                                                                  |

|                        |                          |                                       |          |   |     |             |                                                                                                                                                                            |
|------------------------|--------------------------|---------------------------------------|----------|---|-----|-------------|----------------------------------------------------------------------------------------------------------------------------------------------------------------------------|
| Information Processing | on                       | ol signaling system                   |          |   |     |             | 0000029330 ENSMUSG00000052889                                                                                                                                              |
|                        | Lipid                    | Ether lipid                           |          |   |     |             |                                                                                                                                                                            |
| Metabolism             | metabolism               | metabolism                            | mmu00565 | 5 | 44  | 0.018136244 | ENSMUSG00000041193 ENSMUSG00000022425 ENSMUSG00000041202 ENSMUSG00000027999 ENSMUSG00000021608                                                                             |
| Organismal Systems     | Endocrine system         | Estrogen signaling pathway            | mmu04915 | 8 | 98  | 0.018256664 | ENSMUSG00000019828 ENSMUSG00000041417 ENSMUSG00000017737 ENSMUSG00000031659 ENSMUSG00000031740 ENSMUSG00000024222 ENSMUSG00000027523 ENSMUSG00000022994                    |
| Metabolism             | Global and overview maps | Carbon metabolism                     | mmu01200 | 9 | 118 | 0.018516813 | ENSMUSG00000030541 ENSMUSG00000027187 ENSMUSG00000025190 ENSMUSG00000021456 ENSMUSG00000053604 ENSMUSG00000024827 ENSMUSG00000024640 ENSMUSG00000020534 ENSMUSG00000025745 |
| Organismal Systems     | Digestive system         | Carbohydrate digestion and absorption | mmu04973 | 5 | 45  | 0.019647567 | ENSMUSG00000074264 ENSMUSG00000033161 ENSMUSG00000052889 ENSMUSG00000041417 ENSMUSG00000015968                                                                             |
| Metabolism             | Carbohydrate metabolism  | Glyoxylate and dicarboxylate          | mmu00630 | 4 | 30  | 0.020934627 | ENSMUSG00000026473 ENSMUSG00000020534 ENSMUSG00000024827 ENSMUSG00000027187                                                                                                |
| Metabolism             | Energy metabolism        | Nitrogen metabolism                   | mmu00910 | 3 | 17  | 0.023367473 | ENSMUSG00000026473 ENSMUSG00000038526 ENSMUSG00000000805                                                                                                                   |
| Human Diseases         | Cancers: Overview        | Central carbon metabolism             | mmu05230 | 6 | 66  | 0.025113944 | ENSMUSG00000041417 ENSMUSG00000038028 ENSMUSG00000030110 ENSMUSG00000006494 ENSMUSG00000005672 ENSMUSG00000028645                                                          |



|                       |                                                                                                             | sm in<br>cancer<br>Inflamm<br>atory<br>mediator<br>regulatio |              |   |     |                 |                                                                                                                                                                                    |
|-----------------------|-------------------------------------------------------------------------------------------------------------|--------------------------------------------------------------|--------------|---|-----|-----------------|------------------------------------------------------------------------------------------------------------------------------------------------------------------------------------|
| Organismal<br>Systems | Sensory<br>system<br>Metabolis<br>m of other<br>amino<br>acids<br>Endocrine<br>and<br>metabolic<br>diseases | n of TRP<br>channels<br>beta-Ala<br>nine<br>metaboli<br>sm   | mmu<br>04750 | 9 | 126 | 0.02629<br>5449 | ENSMUSG00000041417 ENSMUSG00000022994 ENSMUSG00000000320 ENSM<br>USG00000032860 ENSMUSG00000031659 ENSMUSG00000033007 ENSMUSGO<br>0000057897 ENSMUSG00000027523 ENSMUSG00000052889 |
| Metabolism            |                                                                                                             |                                                              | mmu<br>00410 | 4 | 33  | 0.02771<br>3119 | ENSMUSG00000057880 ENSMUSG00000026687 ENSMUSG00000025745 ENSM<br>USG00000033308                                                                                                    |
| Human<br>Diseases     |                                                                                                             | Type II<br>diabetes<br>mellitus<br>RIG-I-like<br>receptor    | mmu<br>04930 | 5 | 50  | 0.02843<br>3803 | ENSMUSG00000015968 ENSMUSG00000020866 ENSMUSG00000041417 ENSM<br>USG00000096146 ENSMUSG00000055980                                                                                 |
| Organismal<br>Systems | Immune<br>system                                                                                            | signaling<br>pathway<br>Fc<br>epsilon<br>RI                  | mmu<br>04622 | 6 | 69  | 0.02995<br>3187 | ENSMUSG00000024349 ENSMUSG00000026029 ENSMUSG00000021277 ENSM<br>USG00000021025 ENSMUSG00000026896 ENSMUSG00000035692                                                              |
| Organismal<br>Systems | Immune<br>system<br>Metabolis<br>m of<br>cofactors<br>and<br>vitamins                                       | signaling<br>pathway<br>One<br>carbon<br>pool by<br>folate   | mmu<br>04664 | 6 | 69  | 0.02995<br>3187 | ENSMUSG00000041417 ENSMUSG00000031264 ENSMUSG00000026288 ENSM<br>USG00000033220 ENSMUSG00000030742 ENSMUSG00000058715                                                              |
| Metabolism            |                                                                                                             |                                                              | mmu<br>00670 | 3 | 19  | 0.03014<br>849  | ENSMUSG00000085337 ENSMUSG00000020256 ENSMUSG00000020534                                                                                                                           |
| Metabolism            | Carbohydr                                                                                                   | Inositol                                                     | mmu          | 6 | 70  | 0.03169         | ENSMUSG00000026288 ENSMUSG00000034570 ENSMUSG00000020937 ENSM                                                                                                                      |

|                                 |                                                        |                                                                                                                                                 |              |    |     |                 |                                                                                                                                                                                                                                                                                                                                     |
|---------------------------------|--------------------------------------------------------|-------------------------------------------------------------------------------------------------------------------------------------------------|--------------|----|-----|-----------------|-------------------------------------------------------------------------------------------------------------------------------------------------------------------------------------------------------------------------------------------------------------------------------------------------------------------------------------|
|                                 | ate<br>metabolis<br>m                                  | phosphat<br>e<br>metaboli<br>sm<br>Amyotro<br>phic<br>lateral<br>sclerosis<br>(ALS)<br>Nicotinat<br>e and<br>nicotina<br>mide<br>metaboli<br>sm | 00562        |    |     | 267             | USG00000024525 ENSMUSG00000025178 ENSMUSG00000019139                                                                                                                                                                                                                                                                                |
| Human<br>Diseases               | Neurodeg<br>enerative<br>diseases                      |                                                                                                                                                 | mmu<br>05014 | 5  | 52  | 0.03254<br>431  | ENSMUSG00000007659 ENSMUSG00000031628 ENSMUSG00000028599 ENSM<br>USG00000022982 ENSMUSG00000027187                                                                                                                                                                                                                                  |
| Metabolism                      | Metabolis<br>m of<br>cofactors<br>and<br>vitamins      |                                                                                                                                                 | mmu<br>00760 | 4  | 35  | 0.03287<br>7928 | ENSMUSG00000032271 ENSMUSG00000032456 ENSMUSG00000032420 ENSM<br>USG00000063558                                                                                                                                                                                                                                                     |
| Organismal<br>Systems           | Endocrine<br>system<br>Amino<br>acid<br>metabolis<br>m | Thyroid<br>hormone<br>synthesis<br>Arginine<br>biosynth<br>esis                                                                                 | mmu<br>04918 | 6  | 71  | 0.03349<br>6605 | ENSMUSG00000022994 ENSMUSG00000031659 ENSMUSG00000027523 ENSM<br>USG00000025823 ENSMUSG00000052889 ENSMUSG00000033161                                                                                                                                                                                                               |
| Metabolism                      | Amino<br>acid<br>metabolis<br>m                        |                                                                                                                                                 | mmu<br>00220 | 3  | 20  | 0.03388<br>5144 | ENSMUSG00000026473 ENSMUSG00000025190 ENSMUSG00000020826                                                                                                                                                                                                                                                                            |
| Metabolism                      | Amino<br>acid<br>metabolis<br>m                        | Lysine<br>degradat<br>ion                                                                                                                       | mmu<br>00310 | 5  | 53  | 0.03473<br>1167 | ENSMUSG00000032649 ENSMUSG00000019055 ENSMUSG00000026687 ENSM<br>USG00000025745 ENSMUSG00000032374<br>ENSMUSG00000052593 ENSMUSG00000101111 ENSMUSG00000026407 ENSM<br>USG00000015968 ENSMUSG00000101249 ENSMUSG00000051811 ENSMUSGO<br>0000102070 ENSMUSG00000020788 ENSMUSG00000031628 ENSMUSG000000<br>025428 ENSMUSG00000026029 |
| Human<br>Diseases<br>Metabolism | Neurodeg<br>enerative<br>diseases<br>Amino             | Alzheim<br>e<br>r's<br>disease<br>Alanine,                                                                                                      | mmu<br>05010 | 11 | 177 | 0.03496<br>67   | ENSMUSG00000026473 ENSMUSG00000025190 ENSMUSG00000057880 ENSM                                                                                                                                                                                                                                                                       |

|                   |                                            |                                                                          |              |    |     |                 |                                                                                                                   |
|-------------------|--------------------------------------------|--------------------------------------------------------------------------|--------------|----|-----|-----------------|-------------------------------------------------------------------------------------------------------------------|
|                   | acid<br>metabolism                         | aspartate and<br>glutamate<br>metabolism                                 | 00250        |    |     | 9355            | USG00000024903                                                                                                    |
| Metabolism        | Metabolism of<br>cofactors and<br>vitamins | Vitamin B6<br>metabolism<br>Phenylalanine,<br>tyrosine and<br>tryptophan | mmu<br>00750 | 2  | 9   | 0.04454<br>9492 | ENSMUSG00000024640 ENSMUSG00000063558                                                                             |
| Metabolism        | Amino acid<br>metabolism                   | biosynthesis                                                             | mmu<br>00400 | 2  | 9   | 0.04454<br>9492 | ENSMUSG00000025190 ENSMUSG00000024903                                                                             |
| Human<br>Diseases | Infectious<br>diseases:<br>Bacterial       | Legionellosis                                                            | mmu<br>05134 | 5  | 58  | 0.04700<br>7675 | ENSMUSG00000021025 ENSMUSG00000027995 ENSMUSG00000078566 ENSMUSG00000031628 ENSMUSG00000026029                    |
| Metabolism        | Global and<br>overview<br>maps             | Biosynthesis of<br>amino acids                                           | mmu<br>01230 | 6  | 79  | 0.05031<br>902  | ENSMUSG00000030541 ENSMUSG00000026473 ENSMUSG00000020534 ENSMUSG00000024640 ENSMUSG00000025190 ENSMUSG00000053604 |
| Metabolism        | Amino acid<br>metabolism                   | Phenylalanine<br>metabolism                                              | mmu<br>00360 | 3  | 24  | 0.05108<br>3659 | ENSMUSG00000033307 ENSMUSG00000025190 ENSMUSG00000024903                                                          |
| Genetic           | Folding,                                   | Protein                                                                  | mmu          | 10 | 167 | 0.05226         | ENSMUSG00000029657 ENSMUSG00000053317 ENSMUSG00000032115 ENSM                                                     |

|                                      |                          |                                            |           |    |     |              |                                                                                                                                                                                                                                                                                             |
|--------------------------------------|--------------------------|--------------------------------------------|-----------|----|-----|--------------|---------------------------------------------------------------------------------------------------------------------------------------------------------------------------------------------------------------------------------------------------------------------------------------------|
| Information Processing               | sorting and degradation  | processing in endoplasmic reticulum        | 04141     |    |     | 0332         | USG00000051984 ENSMUSG00000031770 ENSMUSG00000041556 ENSMUSG0000023826 ENSMUSG00000025823 ENSMUSG00000028410 ENSMUSG0000030036                                                                                                                                                              |
| Environmental Information Processing | Signal transduction      | Wnt signaling pathway                      | mmu 04310 | 9  | 146 | 0.05519 8957 | ENSMUSG00000030170 ENSMUSG00000015957 ENSMUSG00000033220 ENSMUSG00000027996 ENSMUSG00000034574 ENSMUSG00000027985 ENSMUSG0000028988 ENSMUSG00000057897 ENSMUSG00000052889                                                                                                                   |
| Metabolism                           | Nucleotide metabolism    | Pyrimidine metabolism                      | mmu 00240 | 7  | 104 | 0.05974 6631 | ENSMUSG00000033308 ENSMUSG00000020407 ENSMUSG00000035824 ENSMUSG00000032420 ENSMUSG00000020638 ENSMUSG00000075704 ENSMUSG0000021236                                                                                                                                                         |
| Metabolism                           | Lipid metabolism         | Synthesis and degradation of ketone bodies | mmu 00072 | 2  | 11  | 0.06064 2642 | ENSMUSG00000022186 ENSMUSG00000027875                                                                                                                                                                                                                                                       |
| Cellular Processes                   | Transport and catabolism | Endocytosis                                | mmu 04144 | 15 | 294 | 0.06315 5641 | ENSMUSG00000018008 ENSMUSG00000026979 ENSMUSG00000030110 ENSMUSG00000046993 ENSMUSG00000024621 ENSMUSG00000036995 ENSMUSG0000027293 ENSMUSG00000055413 ENSMUSG00000025422 ENSMUSG00000045382 ENSMUSG00000075284 ENSMUSG00000026180 ENSMUSG00000005672 ENSMUSG00000040797 ENSMUSG00000056515 |
| Human Diseases                       | Cancers: Overview        | Viral carcinogenesis                       | mmu 05203 | 13 | 245 | 0.06333 4912 | ENSMUSG00000021277 ENSMUSG00000041417 ENSMUSG00000002325 ENSMUSG00000023067 ENSMUSG00000068854 ENSMUSG00000031161 ENSMUSG0000034245 ENSMUSG00000055413 ENSMUSG00000004698 ENSMUSG00000021025 ENSMUSG00000031628 ENSMUSG00000111815 ENSMUSG00000026029                                       |
| Environmental                        | Membranes                | ABC                                        | mmu       | 4  | 46  | 0.07065      | ENSMUSG00000020620 ENSMUSG00000035722 ENSMUSG00000029802 ENSM                                                                                                                                                                                                                               |

|                        |                                    |                                           |           |    |     |             |                                                                                                                                                                                                                                                         |
|------------------------|------------------------------------|-------------------------------------------|-----------|----|-----|-------------|---------------------------------------------------------------------------------------------------------------------------------------------------------------------------------------------------------------------------------------------------------|
| Information Processing | electrotransporters                | Mineral absorption                        | 020104978 | 4  | 46  | 0.0491      | USG00000041797                                                                                                                                                                                                                                          |
| Organismal Systems     | Digestive system                   | Steroid hormone biosynthesis              | mmu00140  | 6  | 87  | 0.071521838 | ENSMUSG00000026177 ENSMUSG00000033161 ENSMUSG00000031765 ENSMUSG00000005413                                                                                                                                                                             |
| Metabolism             | Lipid metabolism                   | Mucin type O-Glycan biosynthesis          | mmu00512  | 3  | 28  | 0.071704429 | ENSMUSG000000061740 ENSMUSG00000026675 ENSMUSG00000024087 ENSMUSG00000000326 ENSMUSG00000030483 ENSMUSG00000032315                                                                                                                                      |
| Metabolism             | Glycan biosynthesis and metabolism | Purine metabolism                         | mmu00230  | 10 | 179 | 0.074115922 | ENSMUSG000000021903 ENSMUSG00000092329 ENSMUSG00000020520 ENSMUSG00000024066 ENSMUSG00000032565 ENSMUSG00000100075 ENSMUSG00000031659 ENSMUSG00000032420 ENSMUSG00000085337 ENSMUSG00000021236 ENSMUSG00000075270 ENSMUSG00000022994 ENSMUSG00000019990 |
| Metabolism             | Nucleotide metabolism              | Non-alcoholic fatty liver disease (NAFLD) | mmu04932  | 9  | 157 | 0.077542754 | ENSMUSG000000101111 ENSMUSG00000022383 ENSMUSG00000055980 ENSMUSG00000051811 ENSMUSG00000101249 ENSMUSG00000026029 ENSMUSG0000102070 ENSMUSG00000031628 ENSMUSG00000041417                                                                              |
| Human Diseases         | Endocrine and metabolic diseases   | Cysteine and methionine metabolism        | mmu00270  | 4  | 49  | 0.083634635 | ENSMUSG000000025190 ENSMUSG00000032350 ENSMUSG00000024903 ENSMUSG00000048087                                                                                                                                                                            |
| Metabolism             | Amino acid metabolism              |                                           |           |    |     |             |                                                                                                                                                                                                                                                         |

|                    |                                           |                                 |          |   |    |             |                                                                                                                                                                                                                 |
|--------------------|-------------------------------------------|---------------------------------|----------|---|----|-------------|-----------------------------------------------------------------------------------------------------------------------------------------------------------------------------------------------------------------|
| Metabolism         | Lipid metabolism                          | Linoleic acid metabolism        | mmu00591 | 4 | 50 | 0.088204734 | ENSMUSG00000018924 ENSMUSG00000041193 ENSMUSG00000041202 ENSMUSG00000027999                                                                                                                                     |
|                    | Carbohydrate                              | Propanoate                      |          |   |    |             |                                                                                                                                                                                                                 |
| Metabolism         | Energy metabolism                         | Oxidative phosphorylation       | mmu00640 | 3 | 31 | 0.089227714 | ENSMUSG00000057880 ENSMUSG00000025745 ENSMUSG00000042010 ENSMUSG00000101111 ENSMUSG00000101249 ENSMUSG00000051811 ENSMUSG00000064367 ENSMUSG00000102070 ENSMUSG00000039347 ENSMUSG0000025428 ENSMUSG00000033793 |
| Metabolism         | Xenobiotics biodegradation and metabolism | Drug metabolism - other enzymes | mmu00190 |   |    | 8           |                                                                                                                                                                                                                 |
| Metabolism         | Cell growth and death                     | Apoptosis - multiple species    | mmu00983 | 4 | 51 | 0.09289265  | ENSMUSG00000024066 ENSMUSG00000020407 ENSMUSG00000035824 ENSMUSG00000033308                                                                                                                                     |
| Cellular Processes | Cancers: Specific types                   | Chronic myeloid leukemia        |          |   |    |             |                                                                                                                                                                                                                 |
| Human Diseases     | Neurodegenerative diseases                | Prion diseases                  | mmu05220 | 5 | 73 | 0.097376443 | ENSMUSG00000021025 ENSMUSG00000023067 ENSMUSG00000041417 ENSMUSG00000022952 ENSMUSG00000007659                                                                                                                  |
| Human Diseases     | Metabolism of other amino acids           | Selenocompound metabolism       | mmu05020 |   |    | 3           |                                                                                                                                                                                                                 |
| Metabolism         |                                           |                                 | mmu00450 | 2 | 17 | 0.117733694 | ENSMUSG00000075704 ENSMUSG00000003477                                                                                                                                                                           |

|                                      |                      |                              |           |    |     |              |                                                                                                                                                                                              |
|--------------------------------------|----------------------|------------------------------|-----------|----|-----|--------------|----------------------------------------------------------------------------------------------------------------------------------------------------------------------------------------------|
|                                      |                      | Bacterial invasion of        |           |    |     |              |                                                                                                                                                                                              |
| Human Diseases                       | Infectious diseases: | epithelial cells             | mmu 05100 | 5  | 78  | 0.11849 1681 | ENSMUSG00000041112 ENSMUSG00000029580 ENSMUSG00000046993 ENSMUSG00000022831 ENSMUSG00000041417                                                                                               |
| Organismal Systems                   | Digestive system     | Salivary secretion           | mmu 04970 | 5  | 78  | 0.11849 1681 | ENSMUSG00000052889 ENSMUSG00000033161 ENSMUSG00000022994 ENSMUSG00000031659 ENSMUSG00000027523                                                                                               |
| Human Diseases                       | Infectious diseases: | Salmonella infection         | mmu 05132 | 5  | 78  | 0.11849 1681 | ENSMUSG00000020826 ENSMUSG00000029580 ENSMUSG00000052688 ENSMUSG00000022965 ENSMUSG00000046993                                                                                               |
| Human Diseases                       | Cancers: Overview    | Choline metabolism in cancer | mmu 05231 | 6  | 101 | 0.11911 5289 | ENSMUSG00000024843 ENSMUSG00000041417 ENSMUSG00000033220 ENSMUSG00000031490 ENSMUSG00000023829 ENSMUSG00000052889                                                                            |
| Organismal Systems                   | Endocrine system     | Glucagon signaling pathway   | mmu 04922 | 6  | 102 | 0.12300 2553 | ENSMUSG00000022383 ENSMUSG00000042010 ENSMUSG00000057897 ENSMUSG00000027523 ENSMUSG00000024900 ENSMUSG00000028645                                                                            |
| Metabolism                           | Lipid metabolism     | Glycerolipid metabolism      | mmu 00561 | 4  | 59  | 0.13436 3749 | ENSMUSG00000052396 ENSMUSG00000026687 ENSMUSG00000038732 ENSMUSG00000025509                                                                                                                  |
| Human Diseases                       | Substance dependence | Alcoholism                   | mmu 05034 | 10 | 204 | 0.13561 6793 | ENSMUSG00000032766 ENSMUSG00000023439 ENSMUSG00000027669 ENSMUSG00000068854 ENSMUSG00000031161 ENSMUSG00000034245 ENSMUSG0000004698 ENSMUSG00000027523 ENSMUSG00000093577 ENSMUSG00000063594 |
| Environmental Information Processing | Signal transduction  | Hippo signaling pathway      | mmu 04390 | 8  | 154 | 0.13650 9672 | ENSMUSG00000030170 ENSMUSG00000025239 ENSMUSG00000029120 ENSMUSG00000037411 ENSMUSG00000027985 ENSMUSG00000015957 ENSMUSG00000029580 ENSMUSG00000020782                                      |
| Metabolism                           | Lipid metabolism     | Steroid biosynthesis         | mmu 00100 | 2  | 19  | 0.13891 1117 | ENSMUSG00000026675 ENSMUSG00000107653                                                                                                                                                        |

|             |            |           |       |   |    |         |                                                               |
|-------------|------------|-----------|-------|---|----|---------|---------------------------------------------------------------|
|             | m          | esis      |       |   |    |         |                                                               |
| Environmen  | Signal     | VEGF      |       |   |    |         |                                                               |
| Information | transducti | signaling | mmu   |   |    | 0.14000 | ENSMUSG00000033220 ENSMUSG00000083816 ENSMUSG00000052889 ENSM |
| Processing  | on         | pathway   | 04370 | 4 | 60 | 5701    | USG00000041417                                                |
|             | Carbohydr  |           |       |   |    |         |                                                               |
|             | ate        | Pyruvate  |       |   |    |         |                                                               |
| Metabolism  | metabolis  | metaboli  | mmu   |   |    | 0.14326 |                                                               |
|             | m          | sm        | 00620 | 3 | 39 | 4409    | ENSMUSG00000061046 ENSMUSG00000026687 ENSMUSG00000042010      |
|             |            | 2-Oxocar  |       |   |    |         |                                                               |
|             |            | boxylic   |       |   |    |         |                                                               |
|             | Global and | acid      |       |   |    |         |                                                               |
| Metabolism  | overview   | metaboli  | mmu   |   |    | 0.14978 |                                                               |
|             | maps       | sm        | 01210 | 2 | 20 | 738     | ENSMUSG00000030541 ENSMUSG00000025190                         |
|             |            | Glycosa   |       |   |    |         |                                                               |
|             |            | minoglyc  |       |   |    |         |                                                               |
|             |            | an        |       |   |    |         |                                                               |
|             |            | biosynth  |       |   |    |         |                                                               |
|             |            | esis -    |       |   |    |         |                                                               |
|             | Glycan     | chondroi  |       |   |    |         |                                                               |
|             | biosynthes | tin       |       |   |    |         |                                                               |
|             | is and     | sulfate / |       |   |    |         |                                                               |
| Metabolism  | metabolis  | dermata   | mmu   |   |    | 0.14978 |                                                               |
|             | m          | n sulfate | 00532 | 2 | 20 | 738     | ENSMUSG00000037347 ENSMUSG00000039497                         |
|             |            | Glycine,  |       |   |    |         |                                                               |
|             |            | serine    |       |   |    |         |                                                               |
|             |            | and       |       |   |    |         |                                                               |
|             | Amino      | threonin  |       |   |    |         |                                                               |
|             | acid       | e         |       |   |    |         |                                                               |
| Metabolism  | metabolis  | metaboli  | mmu   |   |    | 0.15815 |                                                               |
|             | m          | sm        | 00260 | 3 | 41 | 4988    | ENSMUSG00000020534 ENSMUSG00000024827 ENSMUSG00000024640      |



|                    |                         |                                          |           |   |     |              |                                                                                                                                      |
|--------------------|-------------------------|------------------------------------------|-----------|---|-----|--------------|--------------------------------------------------------------------------------------------------------------------------------------|
| Human Diseases     | Cancers: Specific types | Bladder cancer                           | mmu 05219 | 3 | 41  | 0.15815 4988 | ENSMUSG00000031740 ENSMUSG00000017737 ENSMUSG00000023067                                                                             |
| Human Diseases     | Cancers: Specific types | Colorectal cancer                        | mmu 05210 | 4 | 64  | 0.16347 1362 | ENSMUSG00000033220 ENSMUSG00000031628 ENSMUSG00000041417 ENSMUSG00000027985                                                          |
| Human Diseases     | Cancers: Specific types | Glioma                                   | mmu 05214 | 4 | 65  | 0.16954 7497 | ENSMUSG00000023067 ENSMUSG00000052889 ENSMUSG00000041417 ENSMUSG00000057897                                                          |
| Organismal Systems | Excretory system        | Vasopressin-regulated water reabsorption | mmu 04962 | 3 | 43  | 0.17349 3093 | ENSMUSG00000009013 ENSMUSG00000022994 ENSMUSG00000027523                                                                             |
| Human Diseases     | Cancers: Specific types | Pancreatic cancer                        | mmu 05212 | 4 | 66  | 0.17570 1503 | ENSMUSG00000033220 ENSMUSG00000026104 ENSMUSG00000041417 ENSMUSG00000007659                                                          |
| Organismal Systems | Endocrine system        | Progesterone-mediated oocyte maturation  | mmu 04914 | 5 | 90  | 0.17679 362  | ENSMUSG00000025586 ENSMUSG00000022994 ENSMUSG00000111815 ENSMUSG00000031659 ENSMUSG00000041417                                       |
| Organismal Systems | Endocrine system        | Insulin signaling pathway                | mmu 04910 | 7 | 142 | 0.18654 2333 | ENSMUSG00000041417 ENSMUSG00000042010 ENSMUSG00000055980 ENSMUSG00000021456 ENSMUSG00000031490 ENSMUSG00000092368 ENSMUSG00000046794 |
| Human Diseases     | Substance dependence    | Amphetamine addiction                    | mmu 05031 | 4 | 68  | 0.18823 0908 | ENSMUSG00000027523 ENSMUSG00000052889 ENSMUSG00000057897 ENSMUSG00000015968                                                          |
| Metabolism         | Biosynthesis            | Caffeine                                 | mmu       | 1 | 6   | 0.19938      | ENSMUSG00000024066                                                                                                                   |

|                                                                         |                                                 |                                                        |                              |        |          |                                    |                                                                                                                                                                                            |
|-------------------------------------------------------------------------|-------------------------------------------------|--------------------------------------------------------|------------------------------|--------|----------|------------------------------------|--------------------------------------------------------------------------------------------------------------------------------------------------------------------------------------------|
|                                                                         | sis of<br>other<br>secondary<br>metabolit<br>es | metaboli<br>sm                                         | 00232                        |        |          | 173                                |                                                                                                                                                                                            |
| Human<br>Diseases                                                       | Neurodeg<br>enerative<br>diseases<br>Cancers:   | Huntingt<br>on's<br>disease                            | mmu<br>05016                 | 9      | 199      | 0.20548<br>027                     | ENSMUSG000000101111 ENSMUSG000000101249 ENSMUSG000000051811 ENSM<br>USG000000022982 ENSMUSG000000102070 ENSMUSG000000031628 ENSMUSGO<br>0000033826 ENSMUSG000000025428 ENSMUSG000000026029 |
| Human<br>Diseases                                                       | Specific<br>types                               | Melano<br>ma                                           | mmu<br>05218                 | 4      | 72       | 0.21408<br>9016                    | ENSMUSG000000042826 ENSMUSG000000022523 ENSMUSG000000023067 ENSM<br>USG000000041417                                                                                                        |
| Organismal<br>Systems<br>Environmen<br>tal<br>Information<br>Processing | Developm<br>ent                                 | Dorso-ve<br>ntral axis<br>formatio<br>n                | mmu<br>04320                 | 2      | 26       | 0.21776<br>0711                    | ENSMUSG000000025586 ENSMUSG000000032035                                                                                                                                                    |
|                                                                         | Signal<br>transducti<br>on                      | Notch<br>signaling<br>pathway<br>Amino<br>sugar<br>and | mmu<br>04330                 | 3      | 49       | 0.22167<br>9521                    | ENSMUSG000000049502 ENSMUSG000000052593 ENSMUSG000000014773                                                                                                                                |
| Metabolism                                                              | Carbohydr<br>ate<br>metabolis<br>m              | nucleotid<br>e sugar<br>metaboli<br>sm                 | mmu<br>00520                 | 3      | 49       | 0.22167<br>9521                    | ENSMUSG000000048065 ENSMUSG000000036820 ENSMUSG000000052102                                                                                                                                |
| Organismal<br>Systems<br>Human<br>Diseases                              | Endocrine<br>system<br>Infectious<br>diseases:  | Prolactin<br>signaling<br>pathway<br>Pertussis         | mmu<br>04917<br>mmu<br>05133 | 4<br>4 | 74<br>74 | 0.22736<br>8285<br>0.22736<br>8285 | ENSMUSG000000048756 ENSMUSG000000026104 ENSMUSG000000018899 ENSM<br>USG000000041417<br>ENSMUSG000000020826 ENSMUSG000000031628 ENSMUSG000000056130 ENSM<br>USG000000018899                 |

|                                      |                                           |                                |           |    |     |              |                                                                                                                                                                                                                                                                                                                |
|--------------------------------------|-------------------------------------------|--------------------------------|-----------|----|-----|--------------|----------------------------------------------------------------------------------------------------------------------------------------------------------------------------------------------------------------------------------------------------------------------------------------------------------------|
| Environmental Information Processing | Bacterial                                 | Sphingolipid signaling pathway | mmu 04071 | 6  | 125 | 0.22743 9811 | ENSMUSG00000041417 ENSMUSG00000029120 ENSMUSG00000033220 ENSMUSG00000058715 ENSMUSG00000052889 ENSMUSG00000043895                                                                                                                                                                                              |
|                                      | Signal transduction Cell growth and death |                                |           |    |     |              |                                                                                                                                                                                                                                                                                                                |
| Cellular Processes                   | growth and death                          | Cell cycle                     | mmu 04110 | 6  | 125 | 0.22743 9811 | ENSMUSG00000036390 ENSMUSG00000029521 ENSMUSG00000023067 ENSMUSG00000032411 ENSMUSG00000111815 ENSMUSG00000015312 ENSMUSG00000041417 ENSMUSG00000002111 ENSMUSG00000021277 ENSMUSG00000023067 ENSMUSG00000051457 ENSMUSG00000032089 ENSMUSG0000005540 ENSMUSG00000002983 ENSMUSG00000021025 ENSMUSG00000055413 |
| Human Diseases                       | Infectious diseases: Viral                | Epstein-Barr virus infection   | mmu 05169 | 10 | 232 | 0.22803 8458 |                                                                                                                                                                                                                                                                                                                |
| Human Diseases                       | Endocrine and metabolic diseases          | onset of diabetes young        | mmu 04950 | 2  | 27  | 0.22937 3784 | ENSMUSG00000026398 ENSMUSG00000017950                                                                                                                                                                                                                                                                          |
| Human Diseases                       | Cancers: Specific types                   | Endometrial cancer             | mmu 05213 | 3  | 52  | 0.24668 9826 | ENSMUSG00000048756 ENSMUSG00000041417 ENSMUSG00000027985                                                                                                                                                                                                                                                       |
| Human Diseases                       | Cancers: Specific types                   | Thyroid cancer                 | mmu 05216 | 2  | 29  | 0.25270 3222 | ENSMUSG00000027985 ENSMUSG00000030110                                                                                                                                                                                                                                                                          |
| Human Diseases                       | Cancers: Specific types                   | Basal cell carcinoma           | mmu 05217 | 3  | 55  | 0.27210 2809 | ENSMUSG00000030170 ENSMUSG00000027985 ENSMUSG00000015957                                                                                                                                                                                                                                                       |
| Metabolism                           | Carbohydrate metabolism                   | Pentose phosphate pathway      | mmu 00030 | 2  | 31  | 0.27608 2592 | ENSMUSG00000053604 ENSMUSG00000021456                                                                                                                                                                                                                                                                          |
| Human                                | Cancers:                                  | Non-sma                        | mmu       | 3  | 56  | 0.28063      | ENSMUSG00000048756 ENSMUSG00000052889 ENSMUSG00000041417                                                                                                                                                                                                                                                       |

|                                |                                      |                                                         |          |   |    |             |                                                                             |
|--------------------------------|--------------------------------------|---------------------------------------------------------|----------|---|----|-------------|-----------------------------------------------------------------------------|
| Diseases                       | Specific types                       | II cell lung cancer NOD-like receptor signaling pathway | 05223    |   |    | 8023        |                                                                             |
| Organismal Systems             | Immune system                        | Ubiquinone and other terpenoid-quinone biosynthesis     | mmu04621 | 3 | 59 | 0.306365057 | ENSMUSG00000021025 ENSMUSG00000021709 ENSMUSG00000026029                    |
| Metabolism                     | Metabolism of cofactors and vitamins | Taurine and hypotaurine metabolism                      | mmu00130 | 1 | 11 | 0.316980393 | ENSMUSG00000003849                                                          |
| Metabolism                     | Metabolism of other amino acids      | Base excision repair                                    | mmu00430 | 1 | 11 | 0.316980393 | ENSMUSG00000006344                                                          |
| Genetic Information Processing | Replication and repair               | Long-term depression                                    | mmu03410 | 2 | 35 | 0.322624687 | ENSMUSG00000029591 ENSMUSG00000035121                                       |
| Organismal Systems             | Nervous system                       | Taste transduction                                      | mmu04730 | 3 | 61 | 0.323569684 | ENSMUSG00000027523 ENSMUSG00000019828 ENSMUSG00000052889                    |
| Organismal Systems             | Sensory system                       |                                                         | mmu04742 | 4 | 89 | 0.331717525 | ENSMUSG00000019828 ENSMUSG00000022994 ENSMUSG00000023439 ENSMUSG00000031343 |

|                    |                         |                                          |          |   |     |             |                                                                                                |
|--------------------|-------------------------|------------------------------------------|----------|---|-----|-------------|------------------------------------------------------------------------------------------------|
| Human Diseases     | Cancers:                |                                          |          |   |     |             |                                                                                                |
|                    | Specific types          | Prostate cancer                          | mmu05215 | 4 | 89  | 0.331717525 | ENSMUSG00000021025 ENSMUSG00000023067 ENSMUSG00000041417 ENSMUSG00000027985                    |
| Organismal Systems | Nervous system          | Synaptic vesicle cycle                   | mmu04721 | 3 | 62  | 0.332174329 | ENSMUSG00000039347 ENSMUSG00000031840 ENSMUSG00000033793                                       |
|                    |                         | Pentose and glucuronate interconversions | mmu00040 | 2 | 36  | 0.334157388 | ENSMUSG00000039450 ENSMUSG00000027227                                                          |
| Metabolism         | Carbohydrate metabolism | Cytosolic DNA-sensing pathway            | mmu04623 | 3 | 64  | 0.349366907 | ENSMUSG00000021025 ENSMUSG00000024349 ENSMUSG00000027514                                       |
| Organismal Systems | Immune system           | Neurotrophin signaling pathway           | mmu04722 | 5 | 122 | 0.365319181 | ENSMUSG00000021025 ENSMUSG00000048756 ENSMUSG00000041417 ENSMUSG00000057897 ENSMUSG00000055980 |
| Organismal Systems | Nervous system          | Long-term potentiation                   | mmu04720 | 3 | 66  | 0.366510302 | ENSMUSG00000019828 ENSMUSG00000052889 ENSMUSG00000057897                                       |
| Metabolism         | Carbohydrate metabolism | Glycolysis / Gluconeogenesis             | mmu00010 | 3 | 66  | 0.366510302 | ENSMUSG00000026687 ENSMUSG00000074207 ENSMUSG00000021456                                       |
|                    | Lipid metabolism        | Fatty acid biosynthesis                  | mmu00061 | 1 | 14  | 0.379082988 | ENSMUSG00000042010                                                                             |

|                                |                                      |                                              |          |    |     |             |                                                                                                                                                                                                                                            |
|--------------------------------|--------------------------------------|----------------------------------------------|----------|----|-----|-------------|--------------------------------------------------------------------------------------------------------------------------------------------------------------------------------------------------------------------------------------------|
|                                |                                      | esis                                         |          |    |     |             |                                                                                                                                                                                                                                            |
| Human Diseases                 | Substance dependence                 | Nicotine addiction                           | mmu05033 | 2  | 40  | 0.379630765 | ENSMUSG00000031340 ENSMUSG00000031343                                                                                                                                                                                                      |
| Human Diseases                 | Cancers: Specific types              | Renal cell carcinoma                         | mmu05211 | 3  | 68  | 0.38357414  | ENSMUSG00000028645 ENSMUSG00000041417 ENSMUSG00000032035                                                                                                                                                                                   |
| Metabolism                     | Metabolism of cofactors and vitamins | Porphyria and chlorophyll metabolism         | mmu00860 | 2  | 41  | 0.390800535 | ENSMUSG00000005413 ENSMUSG00000003617                                                                                                                                                                                                      |
| Metabolism                     | Glycan biosynthesis and metabolism   | Glycosphingolipid biosynthesis - globoseries | mmu00603 | 1  | 15  | 0.398503665 | ENSMUSG000000040364                                                                                                                                                                                                                        |
| Genetic Information Processing | Replication and repair               | Nucleotide excision repair                   | mmu03420 | 2  | 44  | 0.423740983 | ENSMUSG00000028329 ENSMUSG00000003549<br>ENSMUSG000000069662 ENSMUSG000000083816 ENSMUSG00000024087 ENSMUSG000000017737 ENSMUSG00000023067 ENSMUSG000000055980 ENSMUSG00000022510 ENSMUSG00000020108 ENSMUSG00000031628 ENSMUSG00000052889 |
| Human Diseases                 | Cancers: Overview                    | MicroRNAs in cancer                          | mmu05206 | 10 | 281 | 0.425770494 |                                                                                                                                                                                                                                            |
| Metabolism                     | Metabolism of cofactors              | Pantothenate and CoA                         | mmu00770 | 1  | 18  | 0.45319918  | ENSMUSG000000033308                                                                                                                                                                                                                        |

|                                                           |                                                                                  |                                                                                                                                                       |              |   |     |                 |                                                                                                     |
|-----------------------------------------------------------|----------------------------------------------------------------------------------|-------------------------------------------------------------------------------------------------------------------------------------------------------|--------------|---|-----|-----------------|-----------------------------------------------------------------------------------------------------|
| Metabolism                                                | and<br>vitamins<br>Glycan<br>biosynthes<br>is and<br>metabolis<br>m              | biosynth<br>esis<br><br>Other<br>glycan<br>degradat<br>ion<br><br>Signaling<br>pathway<br>s<br>regulatin<br>g<br>pluripote<br>ncy of<br>stem<br>cells | mmu<br>00511 | 1 | 18  | 0.45319<br>918  | ENSMUSG00000028164                                                                                  |
|                                                           | Cellular<br>communit<br>y -<br>eukaryote<br>s                                    |                                                                                                                                                       |              |   |     |                 |                                                                                                     |
| Cellular<br>Processes                                     | Infectious<br>diseases:<br>Parasitic<br>Replicatio<br>n and<br>repair<br>Cell    |                                                                                                                                                       | mmu<br>04550 | 5 | 140 | 0.47602<br>2145 | ENSMUSG00000030170 ENSMUSG00000027796 ENSMUSG00000015957 ENSM<br>USG000000041417 ENSMUSG00000021255 |
| Human<br>Diseases<br>Genetic<br>Information<br>Processing |                                                                                  |                                                                                                                                                       | mmu<br>05144 | 2 | 50  | 0.48667<br>2521 | ENSMUSG00000023885 ENSMUSG00000027995                                                               |
|                                                           |                                                                                  | Fanconi<br>anemia<br>pathway                                                                                                                          | mmu<br>03460 | 2 | 51  | 0.49673<br>9592 | ENSMUSG00000026429 ENSMUSG00000003549                                                               |
| Cellular<br>Processes                                     | growth<br>and death<br>Metabolis<br>m of<br>terpenoids<br>and<br>polyketide<br>s | Oocyte<br>meiosis<br>Terpenoi<br>d<br>backbon<br>e<br>biosynth<br>esis                                                                                | mmu<br>04114 | 4 | 116 | 0.51931<br>7783 | ENSMUSG00000025586 ENSMUSG00000022994 ENSMUSG00000057897 ENSM<br>USG000000031659                    |
| Metabolism                                                |                                                                                  |                                                                                                                                                       | mmu<br>00900 | 1 | 24  | 0.54813<br>1561 | ENSMUSG00000027875                                                                                  |

|                                           |                                    |                                                           |          |   |     |             |                                                                             |
|-------------------------------------------|------------------------------------|-----------------------------------------------------------|----------|---|-----|-------------|-----------------------------------------------------------------------------|
| Metabolism                                | Amino acid metabolism              | Histidine metabolism                                      | mmu00340 | 1 | 26  | 0.575963267 | ENSMUSG00000026687                                                          |
| Metabolism                                | Glycan biosynthesis and metabolism | Glycosphingolipid biosynthesis - lacto and neolactoseries | mmu00601 | 1 | 26  | 0.575963267 | ENSMUSG00000040364                                                          |
| Organismal Systems                        | Excretory system                   | Collectin g duct acid secretion                           | mmu04966 | 1 | 27  | 0.589230028 | ENSMUSG00000039347                                                          |
| Metabolism Genetic Information Processing | Carbohydrate metabolism            | Ascorbate and aldarate metabolism                         | mmu00053 | 1 | 27  | 0.589230028 | ENSMUSG00000026687                                                          |
| Information Processing                    | Transcription                      | Spliceosome                                               | mmu03040 | 4 | 135 | 0.635252462 | ENSMUSG00000021134 ENSMUSG00000022774 ENSMUSG00000070729 ENSMUSG00000031134 |
| Metabolism Genetic Information Processing | Glycan biosynthesis and metabolism | Other types of O-glycan biosynthesis                      | mmu00514 | 1 | 31  | 0.6382771   | ENSMUSG00000032649                                                          |
| Information Processing                    | Folding, sorting and               | Protein export                                            | mmu03060 | 1 | 31  | 0.6382771   | ENSMUSG00000053317                                                          |



|             |                 |           |       |   |     |         |                                                               |
|-------------|-----------------|-----------|-------|---|-----|---------|---------------------------------------------------------------|
|             | degradati<br>on |           |       |   |     |         |                                                               |
|             | Carbohydr       | Citrate   |       |   |     |         |                                                               |
|             | ate             | cycle     |       |   |     |         |                                                               |
|             | metabolis       | (TCA      | mmu   |   |     | 0.64959 |                                                               |
| Metabolism  | m               | cycle)    | 00020 | 1 | 32  | 5678    | ENSMUSG00000030541                                            |
|             | Folding,        | SNARE     |       |   |     |         |                                                               |
|             | sorting         | interacti |       |   |     |         |                                                               |
| Genetic     | and             | ons in    |       |   |     |         |                                                               |
| Information | degradati       | vesicular | mmu   |   |     | 0.66056 |                                                               |
| Processing  | on              | transport | 04130 | 1 | 33  | 0365    | ENSMUSG00000039232                                            |
|             | Folding,        | Ubiquitin |       |   |     |         |                                                               |
|             | sorting         | mediate   |       |   |     |         |                                                               |
| Genetic     | and             | d         |       |   |     |         |                                                               |
| Information | degradati       | proteolys | mmu   |   |     | 0.68845 | ENSMUSG00000095134 ENSMUSG00000023826 ENSMUSG00000032596 ENSM |
| Processing  | on              | is        | 04120 | 4 | 145 | 02      | USG00000041556                                                |
|             | Infectious      | African   |       |   |     |         |                                                               |
| Human       | diseases:       | trypanos  | mmu   |   |     | 0.70109 |                                                               |
| Diseases    | Parasitic       | omiasis   | 05143 | 1 | 37  | 6207    | ENSMUSG00000052889                                            |
|             | Transport       | Regulatio |       |   |     |         |                                                               |
|             | and             | n of      |       |   |     |         |                                                               |
| Cellular    | catabolis       | autopha   | mmu   |   |     | 0.72829 |                                                               |
| Processes   | m               | gy        | 04140 | 1 | 40  | 0772    | ENSMUSG00000097675                                            |
|             | Folding,        |           |       |   |     |         |                                                               |
|             | sorting         |           |       |   |     |         |                                                               |
| Genetic     | and             | RNA       |       |   |     |         |                                                               |
| Information | degradati       | degradat  | mmu   |   |     | 0.74875 |                                                               |
| Processing  | on              | ion       | 03018 | 2 | 83  | 5276    | ENSMUSG00000032565 ENSMUSG00000022863                         |
| Genetic     | Folding,        |           |       |   |     |         |                                                               |
| Information | sorting         | Proteaso  | mmu   |   |     | 0.76823 |                                                               |
| Processing  | and             | me        | 03050 | 1 | 45  | 2633    | ENSMUSG00000024338                                            |

|                                                           |                                                                     |                                                                     |              |   |     |                 |                                                                                  |
|-----------------------------------------------------------|---------------------------------------------------------------------|---------------------------------------------------------------------|--------------|---|-----|-----------------|----------------------------------------------------------------------------------|
|                                                           | degradati<br>on<br>Glycan<br>biosynthes<br>is and<br>metabolis<br>m | N-Glycan<br>biosynth<br>esis                                        | mmu<br>00510 | 1 | 49  | 0.79591<br>8203 | ENSMUSG00000030036                                                               |
| Metabolism                                                | Substance<br>dependen<br>ce                                         | Cocaine<br>addiction                                                | mmu<br>05030 | 1 | 49  | 0.79591<br>8203 | ENSMUSG00000027523                                                               |
| Human<br>Diseases<br>Genetic<br>Information<br>Processing | Translatio<br>n                                                     | RNA<br>transport<br>mRNA<br>surveilla<br>nce                        | mmu<br>03013 | 4 | 170 | 0.79654<br>7945 | ENSMUSG00000062309 ENSMUSG00000022774 ENSMUSG00000031490 ENSM<br>USG000000027509 |
| Genetic<br>Information<br>Processing                      | Translatio<br>n                                                     | pathway<br>Starch<br>and<br>sucrose<br>metaboli<br>sm               | mmu<br>03015 | 2 | 96  | 0.81523<br>6554 | ENSMUSG00000029120 ENSMUSG00000022774                                            |
| Metabolism<br>Genetic<br>Information<br>Processing        | Carbohydr<br>ate<br>metabolis<br>m                                  | Ribosom<br>e<br>Ribosom<br>e<br>biogenes<br>is in<br>eukaryot<br>es | mmu<br>00500 | 1 | 54  | 0.82592<br>503  | ENSMUSG00000074264                                                               |
| Genetic<br>Information<br>Processing                      | Translatio<br>n                                                     |                                                                     | mmu<br>03010 | 3 | 148 | 0.85457<br>2768 | ENSMUSG00000092368 ENSMUSG00000047676 ENSMUSG00000109695                         |
| Genetic<br>Information<br>Processing                      | Translatio<br>n                                                     |                                                                     | mmu<br>03008 | 1 | 83  | 0.93082<br>1906 | ENSMUSG00000062309                                                               |

|                                      |                     |                            |           |   |      |             |                                       |
|--------------------------------------|---------------------|----------------------------|-----------|---|------|-------------|---------------------------------------|
| Environmental Information Processing | Signal transduction | TGF-beta signaling pathway | mmu 04350 | 1 | 85   | 0.935088968 | ENSMUSG00000027796                    |
| Organismal Systems                   | Sensory system      | Olfactory transduction     | mmu 04740 | 2 | 1102 | 1           | ENSMUSG00000045392 ENSMUSG00000057897 |

**Table SV. KEGG analysis of the DEGs in SPM compared to DbCM.**

| class_A    | class_B                     | Term                  | ID           | Input<br>number | Background<br>number | P-Value         | Input                                                                                                                                                                                                                                                                                                                                                                                                                                                                                                                                                                                                                                                                                                                                                                                                                                                                                                                                                                                                                                                                                                                                                                                                                                                                                                                                                                                                                                       |
|------------|-----------------------------|-----------------------|--------------|-----------------|----------------------|-----------------|---------------------------------------------------------------------------------------------------------------------------------------------------------------------------------------------------------------------------------------------------------------------------------------------------------------------------------------------------------------------------------------------------------------------------------------------------------------------------------------------------------------------------------------------------------------------------------------------------------------------------------------------------------------------------------------------------------------------------------------------------------------------------------------------------------------------------------------------------------------------------------------------------------------------------------------------------------------------------------------------------------------------------------------------------------------------------------------------------------------------------------------------------------------------------------------------------------------------------------------------------------------------------------------------------------------------------------------------------------------------------------------------------------------------------------------------|
| Metabolism | Global and<br>overview maps | Metabolic<br>pathways | mmu0<br>1100 | 122             | 1298                 | 5.72202<br>E-21 | ENSMUSG00000029759 ENSMUSG00000023262 ENSMUSG00000004<br>6598 ENSMUSG000000061518 ENSMUSG000000058624 ENSMUSG00<br>000074064 ENSMUSG00000029455 ENSMUSG00000024978 ENSMU<br>SG000000064345 ENSMUSG000000064356 ENSMUSG00000025991 E<br>NSMUSG00000022474 ENSMUSG00000023070 ENSMUSG000000078<br>592 ENSMUSG000000056973 ENSMUSG000000016252 ENSMUSG000<br>00026005 ENSMUSG000000039450 ENSMUSG000000055978 ENSMUS<br>G000000011752 ENSMUSG00000025509 ENSMUSG000000031278 EN<br>SMUSG00000020182 ENSMUSG000000031173 ENSMUSG00000001998<br>7 ENSMUSG000000064341 ENSMUSG00000025495 ENSMUSG000000<br>001670 ENSMUSG000000010651 ENSMUSG00000025059 ENSMUSG<br>00000028838 ENSMUSG000000071072 ENSMUSG000000052160 ENS<br>MUSG00000028413 ENSMUSG000000044986 ENSMUSG000000037798<br> ENSMUSG00000029201 ENSMUSG000000035834 ENSMUSG000000<br>25204 ENSMUSG00000022853 ENSMUSG000000072949 ENSMUSG0<br>0000003500 ENSMUSG000000032315 ENSMUSG000000102070 ENSM<br>USG00000029545 ENSMUSG00000028541 ENSMUSG00000028011 <br>ENSMUSG000000030660 ENSMUSG00000021235 ENSMUSG00000002<br>8393 ENSMUSG00000022546 ENSMUSG000000083816 ENSMUSG00<br>000003053 ENSMUSG00000028124 ENSMUSG000000032478 ENSMU<br>SG000000057880 ENSMUSG000000042642 ENSMUSG00000020649 E<br>NSMUSG00000021033 ENSMUSG000000001891 ENSMUSG000000035<br>273 ENSMUSG00000027427 ENSMUSG000000080845 ENSMUSG000<br>00019139 ENSMUSG000000025651 ENSMUSG00000029780 ENSMUS |

|                       |                  |                                           |              |    |    |                 |                                                                                                                                                                                                                                                                                                                                                                                                                                                                                                                                                                                                                                                                                                                                                                                                                                                                                                                                                                                                                                                                                                    |
|-----------------------|------------------|-------------------------------------------|--------------|----|----|-----------------|----------------------------------------------------------------------------------------------------------------------------------------------------------------------------------------------------------------------------------------------------------------------------------------------------------------------------------------------------------------------------------------------------------------------------------------------------------------------------------------------------------------------------------------------------------------------------------------------------------------------------------------------------------------------------------------------------------------------------------------------------------------------------------------------------------------------------------------------------------------------------------------------------------------------------------------------------------------------------------------------------------------------------------------------------------------------------------------------------|
| Organismal<br>Systems | Immune<br>system | Complement and<br>coagulation<br>cascades | mmu0<br>4610 | 24 | 87 | 3.49218<br>E-13 | G00000067736 ENSMUSG00000064368 ENSMUSG00000018924 ENSMUSG00000027332 ENSMUSG00000032263 ENSMUSG00000024747 ENSMUSG00000071711 ENSMUSG00000022292 ENSMUSG00000027296 ENSMUSG00000006442 ENSMUSG00000044894 ENSMUSG00000029376 ENSMUSG00000079941 ENSMUSG00000030630 ENSMUSG00000084093 ENSMUSG00000042462 ENSMUSG00000042460 ENSMUSG00000060376 ENSMUSG00000021913 ENSMUSG00000020333 ENSMUSG00000026675 ENSMUSG00000029575 ENSMUSG00000020471 ENSMUSG00000050737 ENSMUSG00000032123 ENSMUSG00000032997 ENSMUSG00000027822 ENSMUSG00000027195 ENSMUSG00000041193 ENSMUSG00000024885 ENSMUSG00000010607 ENSMUSG00000078636 ENSMUSG00000030826 ENSMUSG00000038843 ENSMUSG00000032527 ENSMUSG00000022821 ENSMUSG00000020163 ENSMUSG00000003809 ENSMUSG000000100131 ENSMUSG00000051811 ENSMUSG00000021273 ENSMUSG00000064367 ENSMUSG00000064360 ENSMUSG00000064363 ENSMUSG00000031749 ENSMUSG00000030747 ENSMUSG00000047379 ENSMUSG00000027999 ENSMUSG00000057342 ENSMUSG00000017713 ENSMUSG00000025178 ENSMUSG00000024892 ENSMUSG00000040774 ENSMUSG00000041202 ENSMUSG00000025579 ENSMUSG00000022947 |
|                       |                  |                                           |              |    |    |                 | ENSMUSG00000026715 ENSMUSG00000039109 ENSMUSG00000028001 ENSMUSG00000021999 ENSMUSG00000036887 ENSMUSG00000031444 ENSMUSG00000021492 ENSMUSG00000026579 ENSMUSG00000071178 ENSMUSG00000026399 ENSMUSG00000033831 ENSMUSG00000040552 ENSMUSG00000059481 ENSMUSG00000033860 ENSMUSG00000024164 ENSMUSG00000026874 ENSMUSG00000036896 ENSMUSG00000022181 ENSMUSG00000000290 ENSMUSG00000037411 ENSMUSG00000066366 ENSMUSG00000049130 ENSMUSG00000027249 ENSMUSG00000038224                                                                                                                                                                                                                                                                                                                                                                                                                                                                                                                                                                                                                            |

|                    |                                |                                 |          |    |     |             |                                                                                                                                                                                                                                                                                                                                                                                             |
|--------------------|--------------------------------|---------------------------------|----------|----|-----|-------------|---------------------------------------------------------------------------------------------------------------------------------------------------------------------------------------------------------------------------------------------------------------------------------------------------------------------------------------------------------------------------------------------|
|                    |                                |                                 |          |    |     |             | ENSMUSG00000059498 ENSMUSG00000030830 ENSMUSG00000059481 ENSMUSG00000033860 ENSMUSG00000000290 ENSMUSG0000059089 ENSMUSG00000024164 ENSMUSG00000049130 ENSMUSG00000026874 ENSMUSG00000094694 ENSMUSG00000026656 ENSMUSG00000036887 ENSMUSG00000040552 ENSMUSG00000036896                                                                                                                    |
| Human Diseases     | Infectious diseases: Bacterial | Staphylococcus aureus infection | mmu05150 | 14 | 53  | 4.52642E-08 | ENSMUSG00000079941 ENSMUSG00000025651 ENSMUSG00000020163 ENSMUSG000000102070 ENSMUSG00000084093 ENSMUSG0000064360 ENSMUSG000000100131 ENSMUSG00000025204 ENSMUSG00000051811 ENSMUSG00000067736 ENSMUSG00000064367 ENSMUSG00000074218 ENSMUSG00000064341 ENSMUSG00000064363 ENSMUSG00000064345 ENSMUSG00000016252 ENSMUSG0000061518 ENSMUSG00000064368 ENSMUSG00000064356 ENSMUSG00000044894 |
| Metabolism         | Energy metabolism              | Oxidative phosphorylation       | mmu00190 | 20 | 139 | 5.03457E-07 | ENSMUSG00000083816 ENSMUSG00000059498 ENSMUSG00000094694 ENSMUSG00000024164 ENSMUSG00000004266 ENSMUSG0000059089 ENSMUSG00000027995 ENSMUSG00000000290 ENSMUSG00000027164 ENSMUSG00000027009 ENSMUSG00000030595 ENSMUSG00000026104 ENSMUSG00000052889 ENSMUSG00000039005                                                                                                                    |
| Human Diseases     | Infectious diseases: Parasitic | Leishmaniasis                   | mmu05140 | 14 | 67  | 5.42103E-07 | ENSMUSG00000058818 ENSMUSG00000054594 ENSMUSG00000059498 ENSMUSG00000081665 ENSMUSG00000002111 ENSMUSG0000002325 ENSMUSG00000059089 ENSMUSG00000026104 ENSMUSG00000027164 ENSMUSG00000015340 ENSMUSG00000007613 ENSMUSG00000037902 ENSMUSG00000030579 ENSMUSG00000026656 ENSMUSG00000021936 ENSMUSG00000015837 ENSMUSG00000081723 ENSMUSG00000026072 ENSMUSG00000070873                     |
| Organismal Systems | Development                    | Osteoclast differentiation      | mmu04380 | 19 | 133 | 1.06081E-06 | ENSMUSG00000079941 ENSMUSG00000025651 ENSMUSG00000020163 ENSMUSG000000102070 ENSMUSG00000084093 ENSMUSG0000064360 ENSMUSG000000100131 ENSMUSG00000025204 ENSMUSG00000051811 ENSMUSG00000067736 ENSMUSG00000064367 ENSMUSG00000064368                                                                                                                                                        |
| Human Diseases     | Neurodegenerative diseases     | Parkinson's disease             | mmu05012 | 20 | 149 | 1.33683E-06 | ENSMUSG00000064368                                                                                                                                                                                                                                                                                                                                                                          |

|                    |                          |                                  |          |    |     |             |                                                                                                                                                                                                                                                                                                                                                                                                                                 |
|--------------------|--------------------------|----------------------------------|----------|----|-----|-------------|---------------------------------------------------------------------------------------------------------------------------------------------------------------------------------------------------------------------------------------------------------------------------------------------------------------------------------------------------------------------------------------------------------------------------------|
| Organismal Systems | Endocrine system         | PPAR signaling pathway           | mmu03320 | 15 | 85  | 1.41679E-06 | NSMUSG00000074218 ENSMUSG00000064341 ENSMUSG00000064363 ENSMUSG00000064345 ENSMUSG00000016252 ENSMUSG0000061518 ENSMUSG00000064368 ENSMUSG00000064356 ENSMUSG00000044894                                                                                                                                                                                                                                                        |
|                    |                          |                                  |          |    |     |             | ENSMUSG00000031808 ENSMUSG00000010651 ENSMUSG00000031278 ENSMUSG00000005681 ENSMUSG00000025059 ENSMUSG0000019505 ENSMUSG00000011305 ENSMUSG00000002289 ENSMUSG00000002831 ENSMUSG00000050195 ENSMUSG00000022853 ENSMUSG00000028494 ENSMUSG00000032083 ENSMUSG00000020333 ENSMUSG00000027359                                                                                                                                     |
|                    |                          |                                  |          |    |     |             | ENSMUSG00000025991 ENSMUSG00000022546 ENSMUSG00000001670 ENSMUSG00000078592 ENSMUSG00000037798 ENSMUSG0000017713 ENSMUSG00000030826 ENSMUSG00000023262 ENSMUSG00000078636 ENSMUSG00000031173 ENSMUSG00000026005 ENSMUSG00000024892 ENSMUSG00000019987 ENSMUSG00000011752                                                                                                                                                        |
| Metabolism         | Global and overview maps | Biosynthesis of amino acids      | mmu01230 | 14 | 79  | 3.02194E-06 | ENSMUSG00000068798 ENSMUSG00000019122 ENSMUSG00000034116 ENSMUSG00000023078 ENSMUSG00000027646 ENSMUSG0000030595 ENSMUSG00000026104 ENSMUSG00000060509 ENSMUSG00000035373 ENSMUSG00000029684 ENSMUSG00000049103 ENSMUSG00000035352 ENSMUSG00000003283 ENSMUSG00000043004 ENSMUSG00000023439 ENSMUSG00000033220 ENSMUSG0000028874 ENSMUSG00000052336 ENSMUSG00000021508 ENSMUSG00000063594 ENSMUSG00000052889 ENSMUSG00000020143 |
| Organismal Systems | Immune system            | Chemokine signaling pathway      | mmu04062 | 22 | 198 | 6.74872E-06 | ENSMUSG000000103735 ENSMUSG00000022523 ENSMUSG00000006457 ENSMUSG00000029684 ENSMUSG00000027009 ENSMUSG0000045613 ENSMUSG00000027646 ENSMUSG00000014956 ENSMUSG00000020135 ENSMUSG00000057967 ENSMUSG00000044951 ENSMUSG00000005947 ENSMUSG00000034116 ENSMUSG00000021676 ENSMUSG00000062929 ENSMUSG00000022488 ENSMUSG0000030830 ENSMUSG00000038387 ENSMUSG00000030739 ENSMUS                                                  |
| Cellular Processes | Cell motility            | Regulation of actin cytoskeleton | mmu04810 | 23 | 218 | 9.13466E-06 |                                                                                                                                                                                                                                                                                                                                                                                                                                 |

|                    |                            |                                                        |           |    |     |              |                                                                                                                                                                                                                                                                                                                                                                                                                                                                       |
|--------------------|----------------------------|--------------------------------------------------------|-----------|----|-----|--------------|-----------------------------------------------------------------------------------------------------------------------------------------------------------------------------------------------------------------------------------------------------------------------------------------------------------------------------------------------------------------------------------------------------------------------------------------------------------------------|
|                    |                            |                                                        |           |    |     |              | G00000000290 ENSMUSG00000033220 ENSMUSG00000027249 ENSMUSG00000019907                                                                                                                                                                                                                                                                                                                                                                                                 |
|                    |                            |                                                        |           |    |     |              | ENSMUSG00000032661 ENSMUSG00000025888 ENSMUSG00000044583 ENSMUSG00000059481 ENSMUSG00000002325 ENSMUSG0000026104 ENSMUSG00000024079 ENSMUSG00000042349 ENSMUSG00000059970 ENSMUSG00000032109 ENSMUSG00000037523 ENSMUSG00000039304 ENSMUSG00000030595 ENSMUSG00000018932 ENSMUSG00000035352 ENSMUSG00000021936 ENSMUSG0000024810 ENSMUSG00000052889 ENSMUSG00000039005 ENSMUSG00000026896                                                                             |
| Human Diseases     | Infectious diseases: Viral | Influenza A Valine, leucine and isoleucine degradation | mmu0 5164 | 20 | 172 | 9.50885 E-06 | ENSMUSG00000029482 ENSMUSG00000010651 ENSMUSG00000029545 ENSMUSG00000022853 ENSMUSG00000030826 ENSMUSG0000027332 ENSMUSG00000057880 ENSMUSG00000032263 ENSMUSG00000029455 ENSMUSG00000032527 ENSMUSG00000060376 ENSMUSG00000079941 ENSMUSG00000025651 ENSMUSG00000020163 ENSMUSG00000084093 ENSMUSG00000053093 ENSMUSG0000061518 ENSMUSG00000051811 ENSMUSG00000074218 ENSMUSG00000044894 ENSMUSG00000102070 ENSMUSG00000015968 ENSMUSG00000054640 ENSMUSG00000020882 |
| Metabolism         | Amino acid metabolism      |                                                        | mmu0 0280 | 11 | 56  | 1.47065 E-05 | ENSMUSG00000032661 ENSMUSG00000094694 ENSMUSG00000039304 ENSMUSG00000002325 ENSMUSG00000026656 ENSMUSG0000027995 ENSMUSG00000026104 ENSMUSG00000024079 ENSMUSG00000042349 ENSMUSG00000059970 ENSMUSG00000037523 ENSMUSG00000027164 ENSMUSG00000030595 ENSMUSG00000004043 ENSMUSG00000044583 ENSMUSG00000039005 ENSMUSG00000026896                                                                                                                                     |
| Organismal Systems | Circulatory system         | Cardiac muscle contraction                             | mmu0 4260 | 13 | 80  | 1.54671 E-05 | ENSMUSG00000058818 ENSMUSG00000025491 ENSMUSG00000094694 ENSMUSG00000004266 ENSMUSG00000026656 ENSMUSG0000028459 ENSMUSG00000028159 ENSMUSG00000033220 ENSMUSG00000025017 ENSMUSG00000030595 ENSMUSG00000052889 ENSMUSG00000034116                                                                                                                                                                                                                                    |
| Human Diseases     | Infectious diseases: Viral | Measles                                                | mmu0 5162 | 17 | 139 | 2.41985 E-05 |                                                                                                                                                                                                                                                                                                                                                                                                                                                                       |
| Organismal Systems | Immune system              | B cell receptor signaling pathway                      | mmu0 4662 | 12 | 75  | 3.73224 E-05 |                                                                                                                                                                                                                                                                                                                                                                                                                                                                       |



|                                      |                                     |                                        |          |    |     |             |                                                                                                                                                                                                                                                                                                                                                                                                                                                                        |
|--------------------------------------|-------------------------------------|----------------------------------------|----------|----|-----|-------------|------------------------------------------------------------------------------------------------------------------------------------------------------------------------------------------------------------------------------------------------------------------------------------------------------------------------------------------------------------------------------------------------------------------------------------------------------------------------|
|                                      |                                     |                                        |          |    |     |             | ENSMUSG00000059498 ENSMUSG00000067235 ENSMUSG00000026712 ENSMUSG00000036499 ENSMUSG00000024164 ENSMUSG0000059089 ENSMUSG00000027995 ENSMUSG00000000290 ENSMUSG00000015340 ENSMUSG00000058672 ENSMUSG00000025044 ENSMUSG00000055413 ENSMUSG00000022797 ENSMUSG000000094694 ENSMUSG00000026656 ENSMUSG00000103735 ENSMUSG0000038642 ENSMUSG00000026202 ENSMUSG00000026390 ENSMUSG00000039005                                                                             |
| Cellular Processes                   | Transport and catabolism            | Phagosome                              | mmu04145 | 20 | 192 | 4.02838E-05 | ENSMUSG00000026104 ENSMUSG00000059498 ENSMUSG00000026712 ENSMUSG00000036499 ENSMUSG00000057342 ENSMUSG0000059089 ENSMUSG00000027995 ENSMUSG00000044827 ENSMUSG00000000290 ENSMUSG00000027646 ENSMUSG00000027164 ENSMUSG00000026656 ENSMUSG00000056501 ENSMUSG000000094694 ENSMUSG00000021936 ENSMUSG00000038642 ENSMUSG00000024164 ENSMUSG00000055994 ENSMUSG00000039005                                                                                               |
| Human Diseases                       | Infectious diseases: Bacterial      | Tuberculosis                           | mmu05152 | 19 | 179 | 4.93092E-05 | ENSMUSG00000040329 ENSMUSG00000067336 ENSMUSG00000019122 ENSMUSG00000024793 ENSMUSG00000057722 ENSMUSG0000007613 ENSMUSG00000023078 ENSMUSG00000021796 ENSMUSG00000019966 ENSMUSG00000049103 ENSMUSG00000060509 ENSMUSG00000071713 ENSMUSG00000071714 ENSMUSG000000035373 ENSMUSG00000006235 ENSMUSG00000035352 ENSMUSG0000037035 ENSMUSG00000060548 ENSMUSG00000017057 ENSMUSG00000052336 ENSMUSG00000021508 ENSMUSG00000039304 ENSMUSG00000028859 ENSMUSG00000026072 |
| Environmental Information Processing | Signaling molecules and interaction | Cytokine-cytokine receptor interaction | mmu04060 | 24 | 265 | 5.78552E-05 | ENSMUSG00000024087 ENSMUSG00000028011 ENSMUSG00000003809 ENSMUSG00000020182 ENSMUSG00000003477 ENSMUSG0000022853 ENSMUSG00000029455 ENSMUSG00000021913 ENSMUSG00000032315                                                                                                                                                                                                                                                                                              |
| Metabolism                           | Amino acid metabolism               | Tryptophan metabolism                  | mmu00380 | 9  | 47  | 0.000103933 | ENSMUSG00000079339 ENSMUSG00000032661 ENSMUSG00000067235 ENSMUSG00000024164 ENSMUSG00000002325 ENSMUSG0000027995 ENSMUSG00000024079 ENSMUSG00000042349 ENSMUSG00000000000                                                                                                                                                                                                                                                                                              |
| Human Diseases                       | Infectious diseases: Viral          | Herpes simplex infection               | mmu05168 | 21 | 224 | 0.000105012 |                                                                                                                                                                                                                                                                                                                                                                                                                                                                        |

|                                      |                     |                        |          |    |     |             |                                                                                                                                                                                                                                                                                                                                                                                                                                                                                                                                                                                                                     |
|--------------------------------------|---------------------|------------------------|----------|----|-----|-------------|---------------------------------------------------------------------------------------------------------------------------------------------------------------------------------------------------------------------------------------------------------------------------------------------------------------------------------------------------------------------------------------------------------------------------------------------------------------------------------------------------------------------------------------------------------------------------------------------------------------------|
|                                      |                     |                        |          |    |     |             | SG00000014956 ENSMUSG000000062300 ENSMUSG000000037523 ENSMUSG000000026874 ENSMUSG000000055413 ENSMUSG000000027164 ENSMUSG000000030595 ENSMUSG000000026104 ENSMUSG00000035352 ENSMUSG000000021936 ENSMUSG000000055116 ENSMUSG000000046245 ENSMUSG000000026896                                                                                                                                                                                                                                                                                                                                                        |
|                                      |                     |                        |          |    |     |             | ENSMUSG000000026824 ENSMUSG000000094806 ENSMUSG00000003816 ENSMUSG000000043004 ENSMUSG000000023439 ENSMUSG0000068086 ENSMUSG000000020182 ENSMUSG000000063594 ENSMUSG000000018924 ENSMUSG00000003053 ENSMUSG000000015968 ENSMUSG000000027523 ENSMUSG000000004113 ENSMUSG000000052889 ENSMUSG000000032839                                                                                                                                                                                                                                                                                                             |
| Organismal Systems                   | Nervous system      | Serotonergic synapse   | mmu04726 | 15 | 133 | 0.000162192 | ENSMUSG000000002111 ENSMUSG000000022523 ENSMUSG000000046532 ENSMUSG000000015957 ENSMUSG000000020135 ENSMUSG0000057967 ENSMUSG000000020048 ENSMUSG000000019966 ENSMUSG000000026104 ENSMUSG000000038668 ENSMUSG000000036904 ENSMUSG000000079465 ENSMUSG000000063594 ENSMUSG000000017386 ENSMUSG000000025860 ENSMUSG000000040760 ENSMUSG00000021270 ENSMUSG000000001552 ENSMUSG000000027523 ENSMUSG000000083816 ENSMUSG000000006586 ENSMUSG000000023439 ENSMUSG000000033220 ENSMUSG000000004043 ENSMUSG000000027164 ENSMUSG000000007613 ENSMUSG000000021936 ENSMUSG00000028859 ENSMUSG000000043004 ENSMUSG000000052889 |
| Human Diseases                       | Cancers: Overview   | Pathways in cancer     | mmu05200 | 30 | 398 | 0.000167946 | ENSMUSG000000059970 ENSMUSG000000031309 ENSMUSG000000022523 ENSMUSG000000068798 ENSMUSG000000023050 ENSMUSG0000057967 ENSMUSG000000024235 ENSMUSG000000023034 ENSMUSG000000015968 ENSMUSG000000004113 ENSMUSG000000015312 ENSMUSG000000024383 ENSMUSG000000021936 ENSMUSG000000038387 ENSMUSG000000033220 ENSMUSG000000027164 ENSMUSG00000007613 ENSMUSG000000022329 ENSMUSG000000018932 ENSMUSG000000020882 ENSMUSG000000052889 ENSMUSG000000026072                                                                                                                                                                |
| Environmental Information Processing | Signal transduction | MAPK signaling pathway | mmu04010 | 22 | 254 | 0.000207359 | ENSMUSG000000040329 ENSMUSG000000103735 ENSMUSG00000002                                                                                                                                                                                                                                                                                                                                                                                                                                                                                                                                                             |
| Environmental                        | Signal              | PI3K-Akt               | mmu0     | 26 | 350 | 0.00054     |                                                                                                                                                                                                                                                                                                                                                                                                                                                                                                                                                                                                                     |

|                                      |                                |                                           |          |    |     |             |                                                                                                                                                                                                                                                                                                                                                                                                                                                         |
|--------------------------------------|--------------------------------|-------------------------------------------|----------|----|-----|-------------|---------------------------------------------------------------------------------------------------------------------------------------------------------------------------------------------------------------------------------------------------------------------------------------------------------------------------------------------------------------------------------------------------------------------------------------------------------|
| Information Processing               | transduction                   | signaling pathway                         | 4151     |    |     | 1232        | 2523 ENSMUSG00000025017 ENSMUSG00000028518 ENSMUSG0000023034 ENSMUSG00000022309 ENSMUSG00000027009 ENSMUSG00000045613 ENSMUSG00000057967 ENSMUSG00000020048 ENSMUSG00000019966 ENSMUSG00000094694 ENSMUSG00000038668 ENSMUSG00000025915 ENSMUSG00000079465 ENSMUSG0000063594 ENSMUSG00000003865 ENSMUSG00000039005 ENSMUSG00000006235 ENSMUSG00000021270 ENSMUSG00000023439 ENSMUSG00000053007 ENSMUSG00000027995 ENSMUSG00000028859 ENSMUSG00000043004 |
| Human Diseases                       | Infectious diseases: Bacterial | Pertussis                                 | mmu05133 | 10 | 74  | 0.000550563 | ENSMUSG00000025888 ENSMUSG00000000290 ENSMUSG00000024164 ENSMUSG00000027164 ENSMUSG00000062929 ENSMUSG0000026874 ENSMUSG00000036887 ENSMUSG00000021936 ENSMUSG00000036896 ENSMUSG00000039005                                                                                                                                                                                                                                                            |
| Organismal Systems                   | Immune system                  | Fc gamma R-mediated phagocytosis          | mmu04666 | 11 | 90  | 0.000638949 | ENSMUSG00000029684 ENSMUSG00000057342 ENSMUSG00000033220 ENSMUSG00000026656 ENSMUSG00000034116 ENSMUSG0000003283 ENSMUSG00000094694 ENSMUSG00000062929 ENSMUSG00000052889 ENSMUSG00000020143 ENSMUSG00000026395                                                                                                                                                                                                                                         |
| Organismal Systems                   | Immune system                  | Natural killer cell mediated cytotoxicity | mmu04650 | 13 | 121 | 0.000658047 | ENSMUSG00000004709 ENSMUSG00000030830 ENSMUSG00000034116 ENSMUSG00000000290 ENSMUSG00000004266 ENSMUSG0000059089 ENSMUSG00000015355 ENSMUSG00000015437 ENSMUSG00000033220 ENSMUSG00000030579 ENSMUSG00000039304 ENSMUSG00000094694 ENSMUSG00000052889                                                                                                                                                                                                   |
| Environmental Information Processing | Signal transduction            | Hippo signaling pathway                   | mmu04390 | 15 | 154 | 0.000675907 | ENSMUSG00000020782 ENSMUSG00000007613 ENSMUSG00000067336 ENSMUSG00000037411 ENSMUSG00000000290 ENSMUSG0000014956 ENSMUSG00000015957 ENSMUSG00000021796 ENSMUSG00000020644 ENSMUSG00000020135 ENSMUSG00000036904 ENSMUSG00000022568 ENSMUSG00000006262 ENSMUSG00000022329 ENSMUSG00000021112                                                                                                                                                             |
| Human Diseases                       | Cancers: Overview              | Proteoglycans in cancer                   | mmu05205 | 18 | 208 | 0.00075847  | ENSMUSG00000036446 ENSMUSG00000038387 ENSMUSG00000035273 ENSMUSG00000103735 ENSMUSG00000004266 ENSMUSG0000020592 ENSMUSG00000027995 ENSMUSG00000027646 ENSMUSG00000000000                                                                                                                                                                                                                                                                               |

|                                      |                                  |                                           |          |    |     |             |                                                                                                                                                                                                                                                                                                               |
|--------------------------------------|----------------------------------|-------------------------------------------|----------|----|-----|-------------|---------------------------------------------------------------------------------------------------------------------------------------------------------------------------------------------------------------------------------------------------------------------------------------------------------------|
|                                      |                                  |                                           |          |    |     |             | SG00000062209 ENSMUSG00000014956 ENSMUSG00000015957 ENSMUSG00000022516 ENSMUSG00000024975 ENSMUSG00000022831 ENSMUSG00000019907 ENSMUSG00000036904 ENSMUSG00000052889 ENSMUSG00000039005                                                                                                                      |
| Organismal Systems                   | Immune system                    | Cytosolic DNA-sensing pathway             | mmu04623 | 9  | 64  | 0.000796977 | ENSMUSG00000025888 ENSMUSG00000027514 ENSMUSG00000027427 ENSMUSG00000035834 ENSMUSG00000042349 ENSMUSG0000037523 ENSMUSG00000030595 ENSMUSG00000037860 ENSMUSG00000024810                                                                                                                                     |
| Human Diseases                       | Endocrine and metabolic diseases | Non-alcoholic fatty liver disease (NAFLD) | mmu04932 | 15 | 157 | 0.000810669 | ENSMUSG00000079941 ENSMUSG00000025651 ENSMUSG00000020163 ENSMUSG00000057722 ENSMUSG00000084093 ENSMUSG0000006542 ENSMUSG00000025204 ENSMUSG00000051811 ENSMUSG00000061518 ENSMUSG00000005373 ENSMUSG00000074218 ENSMUSG00000044894 ENSMUSG00000102070 ENSMUSG00000021936 ENSMUSG00000028518                   |
| Metabolism                           | Global and overview maps         | Fatty acid metabolism                     | mmu01212 | 8  | 52  | 0.000914845 | ENSMUSG00000027195 ENSMUSG00000010651 ENSMUSG00000031278 ENSMUSG00000029545 ENSMUSG00000021364 ENSMUSG0000022853 ENSMUSG00000050195 ENSMUSG00000020333                                                                                                                                                        |
| Human Diseases                       | Neurodegenerative diseases       | Alzheimer's disease                       | mmu05010 | 16 | 177 | 0.000953045 | ENSMUSG00000079941 ENSMUSG00000025651 ENSMUSG00000020163 ENSMUSG00000078592 ENSMUSG00000084093 ENSMUSG000015968 ENSMUSG00000078636 ENSMUSG00000025204 ENSMUSG00000051811 ENSMUSG00000061518 ENSMUSG00000074218 ENSMUSG00000016252 ENSMUSG00000102070 ENSMUSG00000031878 ENSMUSG00000064356 ENSMUSG00000044894 |
| Human Diseases                       | Endocrine and metabolic diseases | Insulin resistance                        | mmu04931 | 12 | 111 | 0.000995055 | ENSMUSG00000003865 ENSMUSG00000005373 ENSMUSG00000031808 ENSMUSG00000027359 ENSMUSG00000006542 ENSMUSG0000014956 ENSMUSG00000031309 ENSMUSG00000028518 ENSMUSG00000053007 ENSMUSG00000021936 ENSMUSG00000029167 ENSMUSG00000052889                                                                            |
| Environmental Information Processing | Signal transduction              | Jak-STAT signaling pathway                | mmu04630 | 15 | 161 | 0.001025216 | ENSMUSG00000020027 ENSMUSG00000032578 ENSMUSG00000057722 ENSMUSG00000006235 ENSMUSG00000004266 ENSMUSG0000004043 ENSMUSG00000024539 ENSMUSG00000017057 ENSMUSG00000000000                                                                                                                                     |

|                                      |                          |                                       |          |    |     |             |                                                                                                                                                                                                                                                                                                                                                                                                                                 |
|--------------------------------------|--------------------------|---------------------------------------|----------|----|-----|-------------|---------------------------------------------------------------------------------------------------------------------------------------------------------------------------------------------------------------------------------------------------------------------------------------------------------------------------------------------------------------------------------------------------------------------------------|
|                                      |                          |                                       |          |    |     |             | SG00000002325 ENSMUSG00000040329 ENSMUSG00000050222 ENSMUSG00000026104 ENSMUSG00000071713 ENSMUSG00000028859 ENSMUSG00000071714                                                                                                                                                                                                                                                                                                 |
| Organismal Systems                   | Circulatory system       | Vascular smooth muscle contraction    | mmu04270 | 13 | 128 | 0.001059447 | ENSMUSG00000059588 ENSMUSG00000027999 ENSMUSG00000041193 ENSMUSG00000015968 ENSMUSG00000019907 ENSMUSG0000014956 ENSMUSG00000044951 ENSMUSG00000052920 ENSMUSG00000041202 ENSMUSG00000027335 ENSMUSG00000027523 ENSMUSG00000037166 ENSMUSG00000052889                                                                                                                                                                           |
| Environmental Information Processing | Signal transduction      | Calcium signaling pathway             | mmu04020 | 16 | 182 | 0.001247758 | ENSMUSG00000062209 ENSMUSG00000028036 ENSMUSG00000054640 ENSMUSG00000004347 ENSMUSG00000057342 ENSMUSG0000053004 ENSMUSG00000045613 ENSMUSG00000094694 ENSMUSG00000027296 ENSMUSG00000015968 ENSMUSG00000027335 ENSMUSG00000044951 ENSMUSG00000027523 ENSMUSG00000004113 ENSMUSG00000052889 ENSMUSG00000107747                                                                                                                  |
| Cellular Processes                   | Transport and catabolism | Endocytosis                           | mmu04144 | 22 | 294 | 0.001275698 | ENSMUSG00000067235 ENSMUSG00000031488 ENSMUSG00000059970 ENSMUSG00000027423 ENSMUSG00000040990 ENSMUSG0000112639 ENSMUSG00000030465 ENSMUSG00000020817 ENSMUSG00000007613 ENSMUSG00000027646 ENSMUSG00000062209 ENSMUSG00000029684 ENSMUSG00000055413 ENSMUSG00000022797 ENSMUSG00000036499 ENSMUSG00000005656 ENSMUSG0000023353 ENSMUSG00000027164 ENSMUSG00000020078 ENSMUSG00000049076 ENSMUSG00000010080 ENSMUSG00000015733 |
| Organismal Systems                   | Immune system            | RIG-I-like receptor signaling pathway | mmu04622 | 9  | 69  | 0.001288109 | ENSMUSG00000032109 ENSMUSG00000042349 ENSMUSG00000064289 ENSMUSG00000037523 ENSMUSG00000027164 ENSMUSG0000030595 ENSMUSG00000021936 ENSMUSG00000026896 ENSMUSG00000039285                                                                                                                                                                                                                                                       |
| Metabolism                           | Energy metabolism        | Sulfur metabolism                     | mmu00920 | 4  | 11  | 0.001330624 | ENSMUSG00000064254 ENSMUSG00000049858 ENSMUSG00000071711 ENSMUSG00000044986                                                                                                                                                                                                                                                                                                                                                     |
| Human Diseases                       | Cardiovascular diseases  | Hypertrophic cardiomyopathy           | mmu05410 | 10 | 84  | 0.001330869 | ENSMUSG00000053093 ENSMUSG00000103735 ENSMUSG00000027009 ENSMUSG00000006542 ENSMUSG00000020354 ENSMUSG0000001508 ENSMUSG00000028518 ENSMUSG00000015968 ENSMUSG00000000000                                                                                                                                                                                                                                                       |

|                    |                                |                                           |          |    |     |             |                                                                                                                                                                                                                                                                                                                                                                                                                                                                                                                                                                                                                                                                                                                                                                                                                                                                                                                                                                                                                                                                                                                                                                                                                                                                                                                                                                                                                                                                                        |
|--------------------|--------------------------------|-------------------------------------------|----------|----|-----|-------------|----------------------------------------------------------------------------------------------------------------------------------------------------------------------------------------------------------------------------------------------------------------------------------------------------------------------------------------------------------------------------------------------------------------------------------------------------------------------------------------------------------------------------------------------------------------------------------------------------------------------------------------------------------------------------------------------------------------------------------------------------------------------------------------------------------------------------------------------------------------------------------------------------------------------------------------------------------------------------------------------------------------------------------------------------------------------------------------------------------------------------------------------------------------------------------------------------------------------------------------------------------------------------------------------------------------------------------------------------------------------------------------------------------------------------------------------------------------------------------------|
|                    |                                | athy (HCM)                                |          |    |     |             | SG00000054640 ENSMUSG00000020882                                                                                                                                                                                                                                                                                                                                                                                                                                                                                                                                                                                                                                                                                                                                                                                                                                                                                                                                                                                                                                                                                                                                                                                                                                                                                                                                                                                                                                                       |
| Metabolism         | Amino acid metabolism          | Arginine biosynthesis                     | mmu00220 | 5  | 20  | 0.001341055 | ENSMUSG00000025991 ENSMUSG00000022546 ENSMUSG000000019987 ENSMUSG000000023262 ENSMUSG000000031173<br>ENSMUSG000000060981 ENSMUSG000000096010 ENSMUSG000000022181 ENSMUSG000000024164 ENSMUSG000000018199 ENSMUSG00000059089 ENSMUSG000000006457 ENSMUSG000000016559 ENSMUSG000000026874 ENSMUSG000000061482 ENSMUSG000000094694 ENSMUSG000000036887 ENSMUSG000000049932 ENSMUSG000000036896<br>ENSMUSG000000074064 ENSMUSG000000022853 ENSMUSG000000057880 ENSMUSG000000032263 ENSMUSG000000032527 ENSMUSG000000060376<br>ENSMUSG000000025991 ENSMUSG000000022546 ENSMUSG000000023070 ENSMUSG000000078592 ENSMUSG000000029545 ENSMUSG00000078636 ENSMUSG000000026005 ENSMUSG000000024892 ENSMUSG000000022853 ENSMUSG000000021913 ENSMUSG000000032527 ENSMUSG000000011752<br>ENSMUSG000000026824 ENSMUSG000000043004 ENSMUSG000000023439 ENSMUSG000000053007 ENSMUSG000000020182 ENSMUSG00000014956 ENSMUSG000000015968 ENSMUSG000000027523 ENSMUSG000000055116 ENSMUSG000000021936 ENSMUSG000000004113 ENSMUSG000000052889 ENSMUSG000000063594<br>ENSMUSG000000040329 ENSMUSG000000006235 ENSMUSG000000027009 ENSMUSG000000004609 ENSMUSG000000026399 ENSMUSG00000022797 ENSMUSG000000094694 ENSMUSG000000028859 ENSMUSG000000026072 ENSMUSG000000019966<br>ENSMUSG000000036887 ENSMUSG000000024164 ENSMUSG000000027995 ENSMUSG000000027164 ENSMUSG000000007613 ENSMUSG00000027523 ENSMUSG000000035352 ENSMUSG000000021936 ENSMUSG000000037411 ENSMUSG000000036896 ENSMUSG000000039005 |
| Human Diseases     | Immune diseases                | Systemic lupus erythematosus              | mmu05322 | 14 | 149 | 0.001379975 |                                                                                                                                                                                                                                                                                                                                                                                                                                                                                                                                                                                                                                                                                                                                                                                                                                                                                                                                                                                                                                                                                                                                                                                                                                                                                                                                                                                                                                                                                        |
| Metabolism         | Carbohydrate metabolism        | Propanoate metabolism                     | mmu00640 | 6  | 31  | 0.001418154 |                                                                                                                                                                                                                                                                                                                                                                                                                                                                                                                                                                                                                                                                                                                                                                                                                                                                                                                                                                                                                                                                                                                                                                                                                                                                                                                                                                                                                                                                                        |
| Metabolism         | Global and overview maps       | Carbon metabolism                         | mmu01200 | 12 | 118 | 0.001608018 |                                                                                                                                                                                                                                                                                                                                                                                                                                                                                                                                                                                                                                                                                                                                                                                                                                                                                                                                                                                                                                                                                                                                                                                                                                                                                                                                                                                                                                                                                        |
| Organismal Systems | Nervous system                 | Dopaminergic synapse                      | mmu04728 | 13 | 135 | 0.001647553 |                                                                                                                                                                                                                                                                                                                                                                                                                                                                                                                                                                                                                                                                                                                                                                                                                                                                                                                                                                                                                                                                                                                                                                                                                                                                                                                                                                                                                                                                                        |
| Organismal Systems | Immune system                  | Hematopoietic cell lineage                | mmu04640 | 10 | 87  | 0.001690487 |                                                                                                                                                                                                                                                                                                                                                                                                                                                                                                                                                                                                                                                                                                                                                                                                                                                                                                                                                                                                                                                                                                                                                                                                                                                                                                                                                                                                                                                                                        |
| Human Diseases     | Infectious diseases: Parasitic | Chagas disease (American trypanosomiasis) | mmu05142 | 11 | 104 | 0.001865127 |                                                                                                                                                                                                                                                                                                                                                                                                                                                                                                                                                                                                                                                                                                                                                                                                                                                                                                                                                                                                                                                                                                                                                                                                                                                                                                                                                                                                                                                                                        |

|                    |                                 |                                                                |          |    |     |             |                                                                                                                                                                                                                                                                          |
|--------------------|---------------------------------|----------------------------------------------------------------|----------|----|-----|-------------|--------------------------------------------------------------------------------------------------------------------------------------------------------------------------------------------------------------------------------------------------------------------------|
| Metabolism         | Metabolism of other amino acids | beta-Alanine metabolism<br>NOD-like receptor signaling pathway | mmu00410 | 6  | 33  | 0.001879043 | ENSMUSG00000074064 ENSMUSG00000024885 ENSMUSG00000022853 ENSMUSG00000057880 ENSMUSG00000029455 ENSMUSG0000006442                                                                                                                                                         |
| Organismal Systems | Immune system                   | Arrhythmogenic right ventricular cardiomyopathy (ARVC)         | mmu04621 | 8  | 59  | 0.001894237 | ENSMUSG00000025888 ENSMUSG00000055994 ENSMUSG00000021270 ENSMUSG00000027164 ENSMUSG00000020048 ENSMUSG0000030595 ENSMUSG00000035352 ENSMUSG00000021936                                                                                                                   |
| Human Diseases     | Cardiovascular diseases         | Apoptosis                                                      | mmu05412 | 9  | 74  | 0.001998248 | ENSMUSG000000103735 ENSMUSG00000027009 ENSMUSG00000020354 ENSMUSG00000001552 ENSMUSG00000001508 ENSMUSG0000015968 ENSMUSG00000006457 ENSMUSG00000054640 ENSMUSG00000020882                                                                                               |
| Cellular Processes | Cell growth and death           | Arachidonic acid metabolism                                    | mmu04210 | 13 | 139 | 0.002090405 | ENSMUSG00000071713 ENSMUSG00000025860 ENSMUSG00000015437 ENSMUSG00000020486 ENSMUSG00000015312 ENSMUSG0000071714 ENSMUSG00000038642 ENSMUSG00000021936 ENSMUSG00000026202 ENSMUSG00000083282 ENSMUSG00000015337 ENSMUSG00000030560 ENSMUSG00000039304                    |
| Metabolism         | Lipid metabolism                | Dilated cardiomyopathy                                         | mmu00590 | 10 | 90  | 0.002124956 | ENSMUSG00000071072 ENSMUSG00000083816 ENSMUSG00000003053 ENSMUSG00000027999 ENSMUSG00000041193 ENSMUSG0000018924 ENSMUSG00000028597 ENSMUSG00000041202 ENSMUSG00000050737 ENSMUSG00000022947                                                                             |
| Human Diseases     | Cardiovascular diseases         | Oxytocin signaling pathway                                     | mmu05414 | 10 | 90  | 0.002124956 | ENSMUSG00000053093 ENSMUSG00000103735 ENSMUSG00000027009 ENSMUSG00000015968 ENSMUSG00000020354 ENSMUSG0000001508 ENSMUSG00000094694 ENSMUSG00000054640 ENSMUSG00000027523 ENSMUSG00000020882                                                                             |
| Organismal Systems | Endocrine system                |                                                                | mmu04921 | 14 | 158 | 0.002285495 | ENSMUSG00000026824 ENSMUSG00000083816 ENSMUSG00000039145 ENSMUSG00000006542 ENSMUSG00000027646 ENSMUSG0000009292 ENSMUSG00000014956 ENSMUSG00000019907 ENSMUSG00000028518 ENSMUSG00000044951 ENSMUSG00000027523 ENSMUSG00000020882 ENSMUSG00000015968 ENSMUSG00000052889 |

|                                      |                            |                                                                    |          |    |     |             |                                                                                                                                                                                                                                                                                                                                                                                                                                                                                                             |
|--------------------------------------|----------------------------|--------------------------------------------------------------------|----------|----|-----|-------------|-------------------------------------------------------------------------------------------------------------------------------------------------------------------------------------------------------------------------------------------------------------------------------------------------------------------------------------------------------------------------------------------------------------------------------------------------------------------------------------------------------------|
| Environmental Information Processing | Signal transduction        | Rap1 signaling pathway<br>Cysteine and methionine metabolism       | mmu04015 | 17 | 215 | 0.002551704 | ENSMUSG00000022309 ENSMUSG00000038387 ENSMUSG00000000290 ENSMUSG00000000600 ENSMUSG00000030830 ENSMUSG0000057967 ENSMUSG00000026786 ENSMUSG00000038668 ENSMUSG00000027646 ENSMUSG00000033220 ENSMUSG00000022523 ENSMUSG00000037533 ENSMUSG00000068798 ENSMUSG00000019966 ENSMUSG00000027523 ENSMUSG00000018932 ENSMUSG0000052889                                                                                                                                                                            |
|                                      |                            |                                                                    | mmu00270 | 7  | 49  | 0.002759149 | ENSMUSG00000001670 ENSMUSG00000028124 ENSMUSG00000037798 ENSMUSG00000030826 ENSMUSG00000006442 ENSMUSG0000071711 ENSMUSG00000044986                                                                                                                                                                                                                                                                                                                                                                         |
|                                      | Lipid metabolism           | Fatty acid degradation                                             | mmu00071 | 7  | 49  | 0.002759149 | ENSMUSG00000010651 ENSMUSG00000031278 ENSMUSG00000003809 ENSMUSG00000029545 ENSMUSG00000022853 ENSMUSG0000029455 ENSMUSG00000020333                                                                                                                                                                                                                                                                                                                                                                         |
|                                      |                            |                                                                    | mmu04066 | 11 | 110 | 0.002788061 | ENSMUSG00000022309 ENSMUSG00000078592 ENSMUSG00000037411 ENSMUSG00000078636 ENSMUSG00000015340 ENSMUSG0000021367 ENSMUSG00000033688 ENSMUSG00000022797 ENSMUSG00000039005 ENSMUSG00000052889 ENSMUSG00000026773 ENSMUSG00000094694 ENSMUSG00000002111 ENSMUSG00000055435 ENSMUSG00000035356 ENSMUSG00000028926 ENSMUSG0000015437 ENSMUSG00000001552 ENSMUSG00000016559 ENSMUSG00000037369 ENSMUSG00000056501 ENSMUSG00000020644 ENSMUSG00000031613 ENSMUSG00000006586 ENSMUSG00000025142 ENSMUSG00000037876 |
| Human Diseases                       | Cancers: Overview          | HIF-1 signaling pathway<br>Transcriptional misregulation in cancer | mmu05202 | 15 | 180 | 0.002809436 | ENSMUSG00000079941 ENSMUSG00000025651 ENSMUSG00000020163 ENSMUSG00000084093 ENSMUSG00000053007 ENSMUSG0000034706 ENSMUSG00000025204 ENSMUSG00000016252 ENSMUSG00000061518 ENSMUSG00000074218 ENSMUSG00000051811 ENSMUSG00000102070 ENSMUSG00000030922 ENSMUSG00000029167 ENSMUSG00000064356 ENSMUSG00000044894                                                                                                                                                                                              |
|                                      | Neurodegenerative diseases | Huntington's disease                                               | mmu05016 | 16 | 199 | 0.002884318 | ENSMUSG00000030830 ENSMUSG00000069917 ENSMUSG00000000000                                                                                                                                                                                                                                                                                                                                                                                                                                                    |
|                                      | Infectious                 | Malaria                                                            | mmu0     | 7  | 50  | 0.00305     |                                                                                                                                                                                                                                                                                                                                                                                                                                                                                                             |



|                                                    |                            |                                                                                              |                      |          |            |                            |                                                                                                                                                                                                                                                                                                                                                                                                                                                                                                                                           |
|----------------------------------------------------|----------------------------|----------------------------------------------------------------------------------------------|----------------------|----------|------------|----------------------------|-------------------------------------------------------------------------------------------------------------------------------------------------------------------------------------------------------------------------------------------------------------------------------------------------------------------------------------------------------------------------------------------------------------------------------------------------------------------------------------------------------------------------------------------|
| Diseases                                           | diseases:<br>Parasitic     |                                                                                              | 5144                 |          |            | 4983                       | 0290 ENSMUSG00000027995 ENSMUSG00000035352 ENSMUSG0000020592 ENSMUSG00000039005<br>ENSMUSG00000042988 ENSMUSG00000040260 ENSMUSG00000015957 ENSMUSG00000033220 ENSMUSG00000027996 ENSMUSG0000031548 ENSMUSG00000081219 ENSMUSG00000020218 ENSMUSG000000020135 ENSMUSG00000014226 ENSMUSG00000021936 ENSMUSG00000036904 ENSMUSG00000052889<br>ENSMUSG00000067235 ENSMUSG00000030830 ENSMUSG00000053093 ENSMUSG00000000290 ENSMUSG00000033220 ENSMUSG0000020354 ENSMUSG00000026399 ENSMUSG00000001508 ENSMUSG00000094694 ENSMUSG00000055413 |
| Environmental<br>Information<br>Processing         | Signal<br>transduction     | Wnt<br>signaling<br>pathway                                                                  | mmu0<br>4310         | 13       | 146        | 0.00309<br>9006            |                                                                                                                                                                                                                                                                                                                                                                                                                                                                                                                                           |
| Human<br>Diseases                                  | Cardiovascular<br>diseases | Viral<br>myocarditis<br>Glycosamin<br>oglycan<br>biosynthesis<br>and<br>- keratan<br>sulfate | mmu0<br>5416         | 10       | 96         | 0.00326<br>231             |                                                                                                                                                                                                                                                                                                                                                                                                                                                                                                                                           |
| Metabolism                                         | Carbohydrate<br>metabolism | Butanoate<br>metabolism                                                                      | mmu0<br>0533         | 4        | 15         | 0.00339<br>1464            | ENSMUSG00000028541 ENSMUSG00000031749 ENSMUSG00000028413 ENSMUSG00000047379                                                                                                                                                                                                                                                                                                                                                                                                                                                               |
| Metabolism                                         |                            |                                                                                              | mmu0<br>0650         | 5        | 27         | 0.00417<br>8751            | ENSMUSG00000046598 ENSMUSG00000057880 ENSMUSG00000029545 ENSMUSG00000022853 ENSMUSG00000029482<br>ENSMUSG00000022821 ENSMUSG00000001670 ENSMUSG00000030630 ENSMUSG00000024885 ENSMUSG00000020182 ENSMUSG0000021033                                                                                                                                                                                                                                                                                                                        |
| Metabolism                                         | Amino acid<br>metabolism   | Tyrosine<br>metabolism                                                                       | mmu0<br>0350         | 6        | 40         | 0.00441<br>4285            |                                                                                                                                                                                                                                                                                                                                                                                                                                                                                                                                           |
| Organismal<br>Systems                              | Digestive<br>system        | Fat<br>digestion<br>and<br>absorption                                                        | mmu0<br>4975         | 6        | 40         | 0.00441<br>4285            | ENSMUSG00000027999 ENSMUSG00000041193 ENSMUSG00000041202 ENSMUSG00000020609 ENSMUSG00000032083 ENSMUSG0000030747<br>ENSMUSG00000074088 ENSMUSG00000010608 ENSMUSG00000031134 ENSMUSG00000059970 ENSMUSG00000039630 ENSMUSG0000061136 ENSMUSG00000008333 ENSMUSG00000032407 ENSMUSG000000037475 ENSMUSG00000025024 ENSMUSG00000031157 ENSMUSG00000001158                                                                                                                                                                                   |
| Genetic<br>Information<br>Processing<br>Organismal | Transcription<br>Immune    | Spliceosome<br>Toll-like                                                                     | mmu0<br>3040<br>mmu0 | 12<br>10 | 135<br>101 | 0.00444<br>4676<br>0.00454 | ENSMUSG00000026104 ENSMUSG00000027995 ENSMUSG0000004                                                                                                                                                                                                                                                                                                                                                                                                                                                                                      |

|                    |                                  |                                                      |          |    |     |             |                                                                                                                                                                                                                                                                                                                                                                                                                                                                                                                                  |
|--------------------|----------------------------------|------------------------------------------------------|----------|----|-----|-------------|----------------------------------------------------------------------------------------------------------------------------------------------------------------------------------------------------------------------------------------------------------------------------------------------------------------------------------------------------------------------------------------------------------------------------------------------------------------------------------------------------------------------------------|
| Systems            | system                           | receptor signaling pathway                           | 4620     |    |     | 0471        | 4827 ENSMUSG00000027164 ENSMUSG00000024235 ENSMUSG0000044583 ENSMUSG00000042349 ENSMUSG00000018932 ENSMUSG000000021936 ENSMUSG00000039005                                                                                                                                                                                                                                                                                                                                                                                        |
|                    |                                  | Biosynthesis of                                      |          |    |     |             |                                                                                                                                                                                                                                                                                                                                                                                                                                                                                                                                  |
| Metabolism         | Lipid metabolism                 | unsaturated fatty acids                              | mmu01040 | 5  | 28  | 0.004789571 | ENSMUSG00000050195 ENSMUSG00000021364 ENSMUSG000000072949 ENSMUSG00000027195 ENSMUSG00000010651 ENSMUSG00000079339 ENSMUSG00000032661 ENSMUSG000000041378 ENSMUSG00000002325 ENSMUSG00000024079 ENSMUSG0000042349 ENSMUSG00000037523 ENSMUSG00000027164 ENSMUSG00000022336 ENSMUSG00000026104 ENSMUSG00000021936 ENSMUSG00000001739 ENSMUSG00000027999 ENSMUSG00000041193 ENSMUSG00000001865 ENSMUSG00000032839 ENSMUSG00000019066 ENSMUSG0000021999 ENSMUSG00000041202 ENSMUSG00000027523 ENSMUSG00000068798 ENSMUSG00000052889 |
| Human Diseases     | Infectious diseases: Viral       | Hepatitis C                                          | mmu05160 | 12 | 137 | 0.00494911  |                                                                                                                                                                                                                                                                                                                                                                                                                                                                                                                                  |
| Organismal Systems | Digestive system                 | Pancreatic secretion                                 | mmu04972 | 10 | 103 | 0.005150266 |                                                                                                                                                                                                                                                                                                                                                                                                                                                                                                                                  |
|                    |                                  | AGE-RAGE signaling pathway in diabetic complications |          |    |     |             | ENSMUSG00000007613 ENSMUSG00000004043 ENSMUSG00000037411 ENSMUSG00000015340 ENSMUSG00000021367 ENSMUSG0000026104 ENSMUSG00000035352 ENSMUSG00000021936 ENSMUSG00000052889 ENSMUSG00000079465                                                                                                                                                                                                                                                                                                                                     |
| Human Diseases     | Endocrine and metabolic diseases | Leukocyte transendothelial migration                 | mmu04933 | 10 | 103 | 0.005150266 | ENSMUSG00000041378 ENSMUSG00000030830 ENSMUSG00000034116 ENSMUSG00000000290 ENSMUSG00000027009 ENSMUSG0000015340 ENSMUSG00000033220 ENSMUSG00000068798 ENSMUSG00000006457 ENSMUSG00000052889 ENSMUSG00000001739                                                                                                                                                                                                                                                                                                                  |
| Organismal Systems | Immune system                    |                                                      | mmu04670 | 11 | 121 | 0.005412665 | ENSMUSG00000022292 ENSMUSG00000028124 ENSMUSG00000028597 ENSMUSG00000080845 ENSMUSG00000006442 ENSMUSG0000020649 ENSMUSG00000022562                                                                                                                                                                                                                                                                                                                                                                                              |
| Metabolism         | Metabolism of other amino acids  | Glutathione metabolism                               | mmu00480 | 7  | 57  | 0.005855194 |                                                                                                                                                                                                                                                                                                                                                                                                                                                                                                                                  |
| Organismal Systems | Immune system                    | Platelet activation                                  | mmu04611 | 11 | 123 | 0.006050675 | ENSMUSG00000019907 ENSMUSG00000033860 ENSMUSG00000026786 ENSMUSG00000027646 ENSMUSG00000014956 ENSMUSG00                                                                                                                                                                                                                                                                                                                                                                                                                         |

|                    |                                 |                                                  |          |    |     |             |                                                                                                                                                                                                                                                                                                                                                                                                                                                                                                                                                                                                                                                                                                                                                                                                                                                                                                                                                                                                                                                                                                                                                                                                                                                                                                                                                                                      |
|--------------------|---------------------------------|--------------------------------------------------|----------|----|-----|-------------|--------------------------------------------------------------------------------------------------------------------------------------------------------------------------------------------------------------------------------------------------------------------------------------------------------------------------------------------------------------------------------------------------------------------------------------------------------------------------------------------------------------------------------------------------------------------------------------------------------------------------------------------------------------------------------------------------------------------------------------------------------------------------------------------------------------------------------------------------------------------------------------------------------------------------------------------------------------------------------------------------------------------------------------------------------------------------------------------------------------------------------------------------------------------------------------------------------------------------------------------------------------------------------------------------------------------------------------------------------------------------------------|
|                    |                                 |                                                  |          |    |     |             | 000028001 ENSMUSG00000052920 ENSMUSG00000068798 ENSMUSG00000044951 ENSMUSG00000033831 ENSMUSG00000027523 ENSMUSG00000041378 ENSMUSG00000038387 ENSMUSG00000030739 ENSMUSG00000027646 ENSMUSG00000053093 ENSMUSG00000074652 ENSMUSG00000006457 ENSMUSG00000022831 ENSMUSG00000052889 ENSMUSG00000020782 ENSMUSG00000001739 ENSMUSG00000021112 ENSMUSG00000043004 ENSMUSG00000023439 ENSMUSG00000023169 ENSMUSG00000027646 ENSMUSG00000057880 ENSMUSG0000015968 ENSMUSG00000004113 ENSMUSG00000052889 ENSMUSG00000063594 ENSMUSG00000057722 ENSMUSG00000028518 ENSMUSG00000031278 ENSMUSG00000006542 ENSMUSG00000030595 ENSMUSG0000020333 ENSMUSG00000021936 ENSMUSG00000029167 ENSMUSG00000025888 ENSMUSG00000000290 ENSMUSG00000059970 ENSMUSG00000027995 ENSMUSG00000024164 ENSMUSG0000078566 ENSMUSG00000039005 ENSMUSG00000027999 ENSMUSG00000052160 ENSMUSG00000041193 ENSMUSG00000040774 ENSMUSG00000041202 ENSMUSG0000038173 ENSMUSG00000055994 ENSMUSG00000055435 ENSMUSG00000027995 ENSMUSG00000032238 ENSMUSG00000026104 ENSMUSG000001444 ENSMUSG00000039005 ENSMUSG00000055116 ENSMUSG00000006542 ENSMUSG00000032238 ENSMUSG00000028518 ENSMUSG00000030103 ENSMUSG00000003053 ENSMUSG00000027523 ENSMUSG00000053004 ENSMUSG00000032860 ENSMUSG00000027646 ENSMUSG0000033007 ENSMUSG00000021936 ENSMUSG00000018932 ENSMUSG00000014956 ENSMUSG00000052889 ENSMUSG00000026072 |
| Cellular Processes | Cellular community - eukaryotes | Tight junction                                   | mmu04530 | 12 | 141 | 0.006094513 |                                                                                                                                                                                                                                                                                                                                                                                                                                                                                                                                                                                                                                                                                                                                                                                                                                                                                                                                                                                                                                                                                                                                                                                                                                                                                                                                                                                      |
| Organismal Systems | Nervous system                  | GABAergic synapse                                | mmu04727 | 9  | 89  | 0.006112111 |                                                                                                                                                                                                                                                                                                                                                                                                                                                                                                                                                                                                                                                                                                                                                                                                                                                                                                                                                                                                                                                                                                                                                                                                                                                                                                                                                                                      |
| Organismal Systems | Endocrine system                | Adipocytokine signaling pathway                  | mmu04920 | 8  | 73  | 0.006176842 |                                                                                                                                                                                                                                                                                                                                                                                                                                                                                                                                                                                                                                                                                                                                                                                                                                                                                                                                                                                                                                                                                                                                                                                                                                                                                                                                                                                      |
| Human Diseases     | Infectious diseases: Bacterial  | Legionellosis                                    | mmu05134 | 7  | 58  | 0.006374124 |                                                                                                                                                                                                                                                                                                                                                                                                                                                                                                                                                                                                                                                                                                                                                                                                                                                                                                                                                                                                                                                                                                                                                                                                                                                                                                                                                                                      |
| Metabolism         | Lipid metabolism                | Ether lipid metabolism                           | mmu05065 | 6  | 44  | 0.006681141 |                                                                                                                                                                                                                                                                                                                                                                                                                                                                                                                                                                                                                                                                                                                                                                                                                                                                                                                                                                                                                                                                                                                                                                                                                                                                                                                                                                                      |
| Human Diseases     | Immune diseases                 | Inflammatory bowel disease (IBD)                 | mmu05321 | 7  | 59  | 0.006926512 |                                                                                                                                                                                                                                                                                                                                                                                                                                                                                                                                                                                                                                                                                                                                                                                                                                                                                                                                                                                                                                                                                                                                                                                                                                                                                                                                                                                      |
| Organismal Systems | Environmental adaptation        | Circadian rhythm                                 | mmu04710 | 5  | 31  | 0.006998729 |                                                                                                                                                                                                                                                                                                                                                                                                                                                                                                                                                                                                                                                                                                                                                                                                                                                                                                                                                                                                                                                                                                                                                                                                                                                                                                                                                                                      |
| Organismal Systems | Sensory system                  | Inflammatory mediator regulation of TRP channels | mmu04750 | 11 | 126 | 0.007116783 |                                                                                                                                                                                                                                                                                                                                                                                                                                                                                                                                                                                                                                                                                                                                                                                                                                                                                                                                                                                                                                                                                                                                                                                                                                                                                                                                                                                      |

|                                      |                                  |                                |          |    |     |             |                                                                                                                                                                                                                                                                                              |
|--------------------------------------|----------------------------------|--------------------------------|----------|----|-----|-------------|----------------------------------------------------------------------------------------------------------------------------------------------------------------------------------------------------------------------------------------------------------------------------------------------|
| Genetic Information Processing       | Folding, sorting and degradation | Ubiquitin mediated proteolysis | mmu04120 | 12 | 145 | 0.007440157 | ENSMUSG00000020802 ENSMUSG00000025860 ENSMUSG00000095134 ENSMUSG00000025939 ENSMUSG00000030061 ENSMUSG00000020687 ENSMUSG00000024807 ENSMUSG00000112639 ENSMUSG000000027164 ENSMUSG00000021728 ENSMUSG00000025326 ENSMUSG000000070923                                                        |
|                                      |                                  |                                |          |    |     |             | ENSMUSG00000004043 ENSMUSG00000027995 ENSMUSG00000053007 ENSMUSG00000027646 ENSMUSG00000042349 ENSMUSG0000007613 ENSMUSG00000037523 ENSMUSG00000026104 ENSMUSG000000021936 ENSMUSG00000039005 ENSMUSG00000052889 ENSMUSG00000026896                                                          |
|                                      |                                  |                                |          |    |     |             | ENSMUSG00000026824 ENSMUSG00000043004 ENSMUSG00000023439 ENSMUSG00000004347 ENSMUSG00000069094 ENSMUSG0000027523 ENSMUSG00000004113 ENSMUSG00000052889 ENSMUSG000000063594                                                                                                                   |
| Human Diseases                       | Infectious diseases: Viral       | Hepatitis B                    | mmu05161 | 12 | 146 | 0.007810485 | ENSMUSG00000025993 ENSMUSG00000033688 ENSMUSG00000020829 ENSMUSG00000054640 ENSMUSG00000027365 ENSMUSG0000031765                                                                                                                                                                             |
| Human Diseases                       | Substance dependence             | Morphine addiction             | mmu05032 | 9  | 93  | 0.007898386 | ENSMUSG00000020620 ENSMUSG00000050296 ENSMUSG00000029408 ENSMUSG00000026944 ENSMUSG00000029802 ENSMUSG0000031333                                                                                                                                                                             |
| Organismal Systems                   | Digestive system                 | Mineral absorption             | mmu04978 | 6  | 46  | 0.00808598  | ENSMUSG00000049932 ENSMUSG00000060981 ENSMUSG00000023439 ENSMUSG00000096010 ENSMUSG00000027499 ENSMUSG0000053007 ENSMUSG00000020182 ENSMUSG00000034245 ENSMUSG00000014956 ENSMUSG00000016559 ENSMUSG00000061482 ENSMUSG00000004698 ENSMUSG00000027523 ENSMUSG000000043004 ENSMUSG00000063594 |
| Environmental Information Processing | Membrane transport               | ABC transporters               | mmu02010 | 6  | 46  | 0.00808598  | ENSMUSG00000000290 ENSMUSG00000027995 ENSMUSG00000026072 ENSMUSG00000094694 ENSMUSG00000006457 ENSMUSG0000027523 ENSMUSG00000019987 ENSMUSG00000052889 ENSMUSG00000079465 ENSMUSG00000039005                                                                                                 |
| Human Diseases                       | Substance dependence             | Alcoholism                     | mmu05034 | 15 | 204 | 0.008111404 | ENSMUSG00000003865 ENSMUSG00000074064 ENSMUSG0000005                                                                                                                                                                                                                                         |
| Human Diseases                       | Infectious diseases: Parasitic   | Amoebiasis                     | mmu05146 | 10 | 111 | 0.008254539 |                                                                                                                                                                                                                                                                                              |
| Environmental                        | Signal                           | AMPK                           | mmu0     | 11 | 129 | 0.00832     |                                                                                                                                                                                                                                                                                              |

|                                      |                                |                                |           |    |     |             |                                                                                                                                                                                                                                                                                                                                        |
|--------------------------------------|--------------------------------|--------------------------------|-----------|----|-----|-------------|----------------------------------------------------------------------------------------------------------------------------------------------------------------------------------------------------------------------------------------------------------------------------------------------------------------------------------------|
| Information Processing               | transduction                   | signaling pathway              | 4152      |    |     | 4082        | 7722 ENSMUSG00000053007 ENSMUSG00000006542 ENSMUSG0000017950 ENSMUSG00000028518 ENSMUSG00000101904 ENSMUSG000000050195 ENSMUSG00000029167 ENSMUSG00000026773 ENSMUSG00000025495 ENSMUSG00000027999 ENSMUSG00000041193 ENSMUSG00000004270 ENSMUSG00000052160 ENSMUSG0000040774 ENSMUSG00000041202 ENSMUSG00000024978 ENSMUSG00000036833 |
| Metabolism                           | Lipid metabolism               | Glycerophospholipid metabolism | mmu00564  | 9  | 94  | 0.008401365 | ENSMUSG00000067235 ENSMUSG00000060981 ENSMUSG00000096010 ENSMUSG00000024164 ENSMUSG00000002325 ENSMUSG0000004043 ENSMUSG00000053007 ENSMUSG00000024079 ENSMUSG00000027646 ENSMUSG00000034245 ENSMUSG00000006457 ENSMUSG00000055413 ENSMUSG00000022568 ENSMUSG00000004698 ENSMUSG00000025326 ENSMUSG00000001524 ENSMUSG00000061482      |
| Human Diseases                       | Cancers: Overview              | Viral carcinogenesis           | mmu005203 | 17 | 245 | 0.008493489 | ENSMUSG00000083816 ENSMUSG00000053007 ENSMUSG00000055994 ENSMUSG00000021367 ENSMUSG00000024235 ENSMUSG0000056501 ENSMUSG00000021936 ENSMUSG00000035352 ENSMUSG00000018932 ENSMUSG00000022789                                                                                                                                           |
| Environmental Information Processing | Signal transduction            | TNF signaling pathway          | mmu004668 | 10 | 112 | 0.008726142 | ENSMUSG00000026824 ENSMUSG00000043004 ENSMUSG00000023439 ENSMUSG00000053007 ENSMUSG00000045613 ENSMUSG0000028631 ENSMUSG00000015968 ENSMUSG00000004113 ENSMUSG00000052889 ENSMUSG00000063594                                                                                                                                           |
| Organismal Systems                   | Nervous system                 | Cholinergic synapse            | mmu004725 | 10 | 113 | 0.009218118 | ENSMUSG00000025860 ENSMUSG00000059970 ENSMUSG00000027995 ENSMUSG00000026104 ENSMUSG00000046879 ENSMUSG0000027164 ENSMUSG00000030595 ENSMUSG00000018932 ENSMUSG00000021936 ENSMUSG00000039005                                                                                                                                           |
| Human Diseases                       | Infectious diseases: Parasitic | Toxoplasmosis                  | mmu005145 | 10 | 113 | 0.009218118 | ENSMUSG00000026824 ENSMUSG00000023439 ENSMUSG00000023169 ENSMUSG00000032839 ENSMUSG00000007617 ENSMUSG0000015968 ENSMUSG00000027523 ENSMUSG00000043004 ENSMUSG00000052889 ENSMUSG00000063594                                                                                                                                           |
| Organismal Systems                   | Nervous system                 | Glutamatergic synapse          | mmu004724 | 10 | 115 | 0.010265383 | ENSMUSG00000026824 ENSMUSG00000023439 ENSMUSG0000004                                                                                                                                                                                                                                                                                   |
| Organismal                           | Environmental                  | Circadian                      | mmu0      | 9  | 98  | 0.01065     |                                                                                                                                                                                                                                                                                                                                        |

|                                      |                                     |                                          |          |    |     |             |                                                                                                                                                                                                                                                                                                                |
|--------------------------------------|-------------------------------------|------------------------------------------|----------|----|-----|-------------|----------------------------------------------------------------------------------------------------------------------------------------------------------------------------------------------------------------------------------------------------------------------------------------------------------------|
| Systems                              | adaptation                          | entrainment                              | 4713     |    |     | 9632        | 9892 ENSMUSG00000052920 ENSMUSG00000015968 ENSMUSG0000027523 ENSMUSG00000043004 ENSMUSG00000052889 ENSMUSG00000063594                                                                                                                                                                                          |
| Human Diseases                       | Infectious diseases: Viral          | Epstein-Barr virus infection             | mmu05169 | 16 | 232 | 0.010998186 | ENSMUSG00000067235 ENSMUSG00000030830 ENSMUSG00000055413 ENSMUSG00000002111 ENSMUSG00000027427 ENSMUSG0000035834 ENSMUSG00000024079 ENSMUSG00000028874 ENSMUSG00000027164 ENSMUSG00000051457 ENSMUSG00000059970 ENSMUSG00000112639 ENSMUSG00000094694 ENSMUSG00000030595 ENSMUSG00000018932 ENSMUSG00000021936 |
| Metabolism                           | Carbohydrate metabolism             | Pentose and glucuronate interconversions | mmu00040 | 5  | 36  | 0.012112459 | ENSMUSG00000039450 ENSMUSG00000001891 ENSMUSG00000029201 ENSMUSG00000029455 ENSMUSG00000026005                                                                                                                                                                                                                 |
| Organismal Systems                   | Development                         | Axon guidance                            | mmu04360 | 13 | 176 | 0.012699041 | ENSMUSG00000022231 ENSMUSG00000038387 ENSMUSG00000026121 ENSMUSG00000021451 ENSMUSG00000032839 ENSMUSG0000067336 ENSMUSG00000027646 ENSMUSG00000033220 ENSMUSG00000022883 ENSMUSG00000028780 ENSMUSG00000062929 ENSMUSG00000038777 ENSMUSG00000030084                                                          |
| Environmental Information Processing | Signaling molecules and interaction | Cell adhesion molecules (CAMs)           | mmu04514 | 13 | 176 | 0.012699041 | ENSMUSG00000067235 ENSMUSG00000030830 ENSMUSG00000000290 ENSMUSG00000027009 ENSMUSG00000027322 ENSMUSG0000051457 ENSMUSG00000062300 ENSMUSG00000041378 ENSMUSG00000055413 ENSMUSG00000000305 ENSMUSG00000020592 ENSMUSG00000001739 ENSMUSG00000026395                                                          |
| Human Diseases                       | Infectious diseases: Parasitic      | African trypanosomiasis                  | mmu05143 | 5  | 37  | 0.013374683 | ENSMUSG00000032083 ENSMUSG00000052889 ENSMUSG00000004929 ENSMUSG00000069917 ENSMUSG00000094694                                                                                                                                                                                                                 |
| Organismal Systems Cellular          | Nervous system Cellular             | Retrograde endocannabinoid signaling Gap | mmu04723 | 9  | 103 | 0.014088682 | ENSMUSG00000026824 ENSMUSG00000083816 ENSMUSG00000043004 ENSMUSG00000023439 ENSMUSG00000015968 ENSMUSG0000021936 ENSMUSG00000004113 ENSMUSG00000052889 ENSMUSG00000063594                                                                                                                                      |
|                                      |                                     |                                          | mmu0     | 8  | 86  | 0.01460     | ENSMUSG00000024383 ENSMUSG00000027646 ENSMUSG0000005                                                                                                                                                                                                                                                           |

|                    |                                      |                                               |          |    |     |             |                                                                                                                                                                                                                                                                          |
|--------------------|--------------------------------------|-----------------------------------------------|----------|----|-----|-------------|--------------------------------------------------------------------------------------------------------------------------------------------------------------------------------------------------------------------------------------------------------------------------|
| Processes          | community - eukaryotes               | junction                                      | 4540     |    |     | 1367        | 2920 ENSMUSG00000038668 ENSMUSG00000058672 ENSMUSG0000027523 ENSMUSG00000026202 ENSMUSG00000052889                                                                                                                                                                       |
| Metabolism         | Amino acid metabolism                | Lysine degradation                            | mmu00310 | 6  | 53  | 0.014673966 | 2853 ENSMUSG00000029455 ENSMUSG00000021913 ENSMUSG0000034807                                                                                                                                                                                                             |
| Metabolism         | Lipid metabolism                     | Steroid hormone biosynthesis                  | mmu00140 | 8  | 87  | 0.01548515  | 7195 ENSMUSG00000029233 ENSMUSG0000003053 ENSMUSG0000068086 ENSMUSG00000024087 ENSMUSG00000032315                                                                                                                                                                        |
| Metabolism         | Lipid metabolism                     | nic acid metabolism                           | mmu00592 | 4  | 25  | 0.015901727 | ENSMUSG00000041193 ENSMUSG00000010651 ENSMUSG00000041202 ENSMUSG00000027999                                                                                                                                                                                              |
| Cellular Processes | Cellular community - eukaryotes      | Focal adhesion Glycosphingolipid biosynthesis | mmu04510 | 14 | 203 | 0.01663498  | ENSMUSG00000025860 ENSMUSG00000103735 ENSMUSG00000027009 ENSMUSG00000027646 ENSMUSG00000014956 ENSMUSG0000033220 ENSMUSG00000019907 ENSMUSG00000068798 ENSMUSG00000044951 ENSMUSG00000006457 ENSMUSG00000021936 ENSMUSG00000052889 ENSMUSG00000079465 ENSMUSG00000034116 |
| Metabolism         | Glycan biosynthesis and metabolism   | - lacto and neolacto series                   | mmu00601 | 4  | 26  | 0.01786708  | ENSMUSG00000028541 ENSMUSG00000047379 ENSMUSG00000028413 ENSMUSG00000055978                                                                                                                                                                                              |
| Metabolism         | Amino acid metabolism                | Histidine metabolism                          | mmu00340 | 4  | 26  | 0.01786708  | ENSMUSG00000059422 ENSMUSG00000024885 ENSMUSG00000020182 ENSMUSG00000029455                                                                                                                                                                                              |
| Metabolism         | Metabolism of cofactors and vitamins | Porphyrin and chlorophyll metabolism          | mmu00860 | 5  | 41  | 0.019302921 | ENSMUSG00000003617 ENSMUSG00000029575 ENSMUSG000000108628 ENSMUSG00000040466 ENSMUSG00000028393                                                                                                                                                                          |
| Cellular Processes | Cellular community -                 | Adherens junction                             | mmu04520 | 7  | 74  | 0.020062656 | ENSMUSG00000033220 ENSMUSG00000007613 ENSMUSG00000004266 ENSMUSG00000027646 ENSMUSG00000062300 ENSMUSG00                                                                                                                                                                 |

|                                      |                            |                        |          |    |     |             |                                                                                                                                                                                                                                                                                                                                                     |
|--------------------------------------|----------------------------|------------------------|----------|----|-----|-------------|-----------------------------------------------------------------------------------------------------------------------------------------------------------------------------------------------------------------------------------------------------------------------------------------------------------------------------------------------------|
|                                      | eukaryotes                 |                        |          |    |     |             | 000006457 ENSMUSG00000029684                                                                                                                                                                                                                                                                                                                        |
|                                      |                            |                        |          |    |     |             | ENSMUSG00000022309 ENSMUSG00000038387 ENSMUSG00000027999 ENSMUSG00000023439 ENSMUSG00000041193 ENSMUSG0000063594 ENSMUSG00000057967 ENSMUSG00000033220 ENSMUSG000000022523 ENSMUSG00000068798 ENSMUSG00000019966 ENSMUSG00000021936 ENSMUSG00000043004 ENSMUSG00000052889 ENSMUSG00000041202                                                        |
| Environmental Information Processing | Signal transduction        | Ras signaling pathway  | mmu04014 | 15 | 231 | 0.02137392  | ENSMUSG00000028211 ENSMUSG00000007613 ENSMUSG00000067235 ENSMUSG00000030830 ENSMUSG00000038387 ENSMUSG0000015957 ENSMUSG00000004043 ENSMUSG00000002111 ENSMUSG00000020471 ENSMUSG00000020687 ENSMUSG00000020135 ENSMUSG00000055413 ENSMUSG00000000290 ENSMUSG00000063889 ENSMUSG00000021936 ENSMUSG00000036904 ENSMUSG0000026072 ENSMUSG00000025860 |
| Human Diseases                       | Infectious diseases: Viral | HTLV-I infection       | mmu05166 | 18 | 295 | 0.021421118 | ENSMUSG00000039639 ENSMUSG00000053093 ENSMUSG00000053007 ENSMUSG00000015968 ENSMUSG00000014956 ENSMUSG0000027335 ENSMUSG00000054640 ENSMUSG00000063889 ENSMUSG00000027523 ENSMUSG00000020882 ENSMUSG00000034810                                                                                                                                     |
| Organismal Systems                   | Circulatory system         | cardiomyocytes         | mmu04261 | 11 | 152 | 0.023551232 | ENSMUSG00000006542 ENSMUSG00000078566 ENSMUSG00000007613 ENSMUSG00000007617 ENSMUSG00000028518 ENSMUSG0000055148 ENSMUSG00000021936 ENSMUSG00000025915 ENSMUSG00000015312 ENSMUSG00000039304                                                                                                                                                        |
| Environmental Information Processing | Signal transduction        | FoxO signaling pathway | mmu04068 | 10 | 135 | 0.026299306 | ENSMUSG00000038387 ENSMUSG00000033220 ENSMUSG00000053007 ENSMUSG00000015968 ENSMUSG00000045613 ENSMUSG0000014956 ENSMUSG00000051314 ENSMUSG00000019907 ENSMUSG00000068798 ENSMUSG00000027523 ENSMUSG00000021936 ENSMUSG00000020331 ENSMUSG00000034116                                                                                               |
| Environmental Information Processing | Signal transduction        | cAMP signaling pathway | mmu04024 | 13 | 198 | 0.02850703  | ENSMUSG00000022292 ENSMUSG00000004347 ENSMUSG00000029780 ENSMUSG00000032478 ENSMUSG00000035834 ENSMUSG0000058624 ENSMUSG00000069094 ENSMUSG00000027427 ENSMUSG00000020471 ENSMUSG00000015085 ENSMUSG00000003500 ENSMUSG00000000000                                                                                                                  |
| Metabolism                           | Nucleotide metabolism      | Purine metabolism      | mmu00230 | 12 | 179 | 0.030256949 |                                                                                                                                                                                                                                                                                                                                                     |



|                                      |                            |                              |          |   |     |             |                                                                                                                                                                            |
|--------------------------------------|----------------------------|------------------------------|----------|---|-----|-------------|----------------------------------------------------------------------------------------------------------------------------------------------------------------------------|
|                                      |                            |                              |          |   |     |             | NSMUSG00000020649                                                                                                                                                          |
| Metabolism                           | Carbohydrate metabolism    | Galactose metabolism         | mmu00052 | 4 | 32  | 0.032770349 | ENSMUSG00000028541 ENSMUSG00000028413 ENSMUSG00000025579 ENSMUSG00000001891                                                                                                |
| Cellular Processes                   | Transport and catabolism   | Peroxisome Glucagon          | mmu04146 | 7 | 83  | 0.033324465 | ENSMUSG00000010651 ENSMUSG00000031278 ENSMUSG00000027222 ENSMUSG00000022853 ENSMUSG00000074064 ENSMUSG00000020333 ENSMUSG00000027359                                       |
| Organismal Systems                   | Endocrine system           | signaling pathway            | mmu04922 | 8 | 102 | 0.033754869 | ENSMUSG00000003865 ENSMUSG00000053007 ENSMUSG00000006542 ENSMUSG00000020463 ENSMUSG00000028518 ENSMUSG00000027523 ENSMUSG00000011752 ENSMUSG00000029167                    |
| Human Diseases                       | Immune diseases            | Rheumatoid arthritis         | mmu05323 | 7 | 85  | 0.036910873 | ENSMUSG00000030830 ENSMUSG00000000290 ENSMUSG00000027995 ENSMUSG00000094694 ENSMUSG00000035352 ENSMUSG00000022309 ENSMUSG00000039005                                       |
| Environmental Information Processing | Signal transduction        | NF-kappa B signaling pathway | mmu04064 | 8 | 104 | 0.0369748   | ENSMUSG00000083816 ENSMUSG00000025860 ENSMUSG00000027164 ENSMUSG00000094694 ENSMUSG00000052889 ENSMUSG00000026072 ENSMUSG00000015312 ENSMUSG00000039005                    |
| Metabolism                           | Nucleotide metabolism      | Pyrimidine metabolism        | mmu00240 | 8 | 104 | 0.0369748   | ENSMUSG00000022292 ENSMUSG00000029780 ENSMUSG00000032478 ENSMUSG00000035834 ENSMUSG00000042462 ENSMUSG00000027427 ENSMUSG00000020471 ENSMUSG00000020649                    |
| Cellular Processes                   | Transport and catabolism   | Lysosome                     | mmu04142 | 9 | 124 | 0.037642429 | ENSMUSG00000024480 ENSMUSG00000029408 ENSMUSG00000026944 ENSMUSG00000028581 ENSMUSG00000038642 ENSMUSG00000025579 ENSMUSG00000083282 ENSMUSG00000004567 ENSMUSG00000030560 |
| Metabolism                           | Lipid metabolism           | Linoleic acid metabolism     | mmu00591 | 5 | 50  | 0.038296454 | ENSMUSG00000018924 ENSMUSG00000041193 ENSMUSG00000003053 ENSMUSG00000041202 ENSMUSG00000027999                                                                             |
| Human Diseases                       | Neurodegenerative diseases | Prion diseases               | mmu05020 | 4 | 34  | 0.038961806 | ENSMUSG00000036887 ENSMUSG00000026874 ENSMUSG00000036896 ENSMUSG00000022181                                                                                                |
| Human Diseases                       | Substance dependence       | Amphetamine addiction        | mmu05031 | 6 | 68  | 0.039587292 | ENSMUSG00000053007 ENSMUSG00000020182 ENSMUSG00000014956 ENSMUSG00000015968 ENSMUSG00000027523 ENSMUSG00000052889                                                          |
| Metabolism                           | Global and overview maps   | 2-Oxocarboxylic acid         | mmu01210 | 3 | 20  | 0.041554138 | ENSMUSG00000022546 ENSMUSG00000023262 ENSMUSG00000030826                                                                                                                   |

|                                |                         |                                  |          |    |     |             |                                                                                                                                                                                                                 |
|--------------------------------|-------------------------|----------------------------------|----------|----|-----|-------------|-----------------------------------------------------------------------------------------------------------------------------------------------------------------------------------------------------------------|
| Organismal Systems             | Endocrine system        | metabolism                       |          |    |     |             |                                                                                                                                                                                                                 |
|                                |                         | GnRH signaling pathway           | mmu04912 | 7  | 88  | 0.042751432 | ENSMUSG00000027523 ENSMUSG00000015968 ENSMUSG00000024383 ENSMUSG00000027646 ENSMUSG00000021936 ENSMUSG0000018932 ENSMUSG00000052889                                                                             |
| Genetic Information Processing | Translation             | RNA transport                    | mmu03013 | 11 | 170 | 0.045157208 | ENSMUSG00000052825 ENSMUSG00000000838 ENSMUSG00000022336 ENSMUSG00000037475 ENSMUSG00000027236 ENSMUSG0000013736 ENSMUSG00000027680 ENSMUSG00000053453 ENSMUSG00000057561 ENSMUSG00000021282 ENSMUSG00000029145 |
|                                |                         | Renin-angiotensin system         | mmu04614 | 4  | 36  | 0.04577466  | ENSMUSG00000023845 ENSMUSG00000001865 ENSMUSG00000004929 ENSMUSG00000068037                                                                                                                                     |
| Organismal Systems             | Endocrine system        | Prolactin signaling pathway      | mmu04917 | 6  | 74  | 0.054343287 | ENSMUSG00000020027 ENSMUSG00000032578 ENSMUSG00000004043 ENSMUSG00000027646 ENSMUSG00000026104 ENSMUSG0000021936                                                                                                |
|                                |                         | Carbohydrate metabolism          | mmu00620 | 4  | 39  | 0.057154571 | ENSMUSG00000031958 ENSMUSG00000024892 ENSMUSG00000024158 ENSMUSG00000029455                                                                                                                                     |
| Human Diseases                 | Cancers: Specific types | Acute myeloid leukemia           | mmu05221 | 5  | 57  | 0.058923413 | ENSMUSG00000004043 ENSMUSG00000031155 ENSMUSG00000006586 ENSMUSG00000001552 ENSMUSG00000002111                                                                                                                  |
|                                |                         | Folding, sorting and degradation | mmu04122 | 2  | 10  | 0.060519635 | ENSMUSG00000071711 ENSMUSG00000044986                                                                                                                                                                           |
| Genetic Information Processing | Amino acid metabolism   | Sulfur relay system              | mmu04122 | 2  | 10  | 0.060519635 | ENSMUSG00000071711 ENSMUSG00000044986                                                                                                                                                                           |
|                                |                         | Phenylalanine metabolism         | mmu00360 | 3  | 24  | 0.062178788 | ENSMUSG00000024885 ENSMUSG00000001670 ENSMUSG00000020182                                                                                                                                                        |
| Metabolism                     | Digestive system        | Vitamin digestion                | mmu04977 | 3  | 24  | 0.062178788 | ENSMUSG00000032083 ENSMUSG00000020609 ENSMUSG00000020829                                                                                                                                                        |
|                                |                         | and absorption                   | mmu04977 | 3  | 24  | 0.062178788 | ENSMUSG00000032083 ENSMUSG00000020609 ENSMUSG00000020829                                                                                                                                                        |
| Organismal Systems             | Endocrine system        | Ovarian steroidogen              | mmu04913 | 5  | 58  | 0.062299091 | ENSMUSG00000026675 ENSMUSG00000027523 ENSMUSG00000032315 ENSMUSG00000024087 ENSMUSG00000083816                                                                                                                  |

|                                           |                                      |                                                     |          |   |    |             |                                                                                                                                     |
|-------------------------------------------|--------------------------------------|-----------------------------------------------------|----------|---|----|-------------|-------------------------------------------------------------------------------------------------------------------------------------|
|                                           |                                      | esis                                                |          |   |    |             |                                                                                                                                     |
| Metabolism                                | Lipid metabolism                     | Glycerolipid metabolism                             | mmu00561 | 5 | 59 | 0.065781681 | ENSMUSG00000025059 ENSMUSG00000025509 ENSMUSG00000024978 ENSMUSG00000029455 ENSMUSG00000030747                                      |
| Organismal Systems                        | Endocrine system                     | Estrogen signaling pathway                          | mmu04915 | 7 | 98 | 0.066367242 | ENSMUSG00000026824 ENSMUSG00000059970 ENSMUSG00000053007 ENSMUSG00000021270 ENSMUSG00000027646 ENSMUSG0000020048 ENSMUSG00000027523 |
| Environmental Information Processing      | Signal transduction                  | VEGF signaling pathway                              | mmu04370 | 5 | 60 | 0.069370761 | ENSMUSG00000033220 ENSMUSG00000083816 ENSMUSG00000052889 ENSMUSG00000027646 ENSMUSG00000057342                                      |
| Metabolism Genetic Information Processing | Metabolism of cofactors and vitamins | Ubiquinone and other terpenoid-quinone biosynthesis | mmu00130 | 2 | 11 | 0.069956132 | ENSMUSG00000001670 ENSMUSG00000021235                                                                                               |
| Information Processing                    | Replication and repair               | Nucleotide excision repair                          | mmu03420 | 4 | 44 | 0.079146468 | ENSMUSG00000069089 ENSMUSG00000020471 ENSMUSG00000031347 ENSMUSG00000001524                                                         |
| Metabolism                                | Lipid metabolism                     | Fatty acid elongation                               | mmu00062 | 3 | 27 | 0.080188719 | ENSMUSG00000021364 ENSMUSG00000072949 ENSMUSG00000027195                                                                            |
| Metabolism Genetic Information Processing | Carbohydrate metabolism              | Ascorbate and aldarate metabolism                   | mmu00053 | 3 | 27 | 0.080188719 | ENSMUSG00000029201 ENSMUSG00000023070 ENSMUSG00000029455                                                                            |
| Information Processing                    | Folding, sorting and degradation     | RNA degradation                                     | mmu03018 | 6 | 83 | 0.081960628 | ENSMUSG00000034724 ENSMUSG00000027714 ENSMUSG00000027770 ENSMUSG00000000581 ENSMUSG00000033991 ENSMUSG0000036779                    |
| Human Diseases                            | Cancers: Specific types              | Colorectal cancer                                   | mmu05210 | 5 | 64 | 0.084779561 | ENSMUSG00000033220 ENSMUSG00000021936 ENSMUSG00000020135 ENSMUSG00000040760 ENSMUSG00000007613                                      |
| Metabolism                                | Glycan biosynthesis and metabolism   | Mucin type O-Glycan biosynthesis                    | mmu00512 | 3 | 28 | 0.086639982 | ENSMUSG00000031749 ENSMUSG00000042460 ENSMUSG00000038843                                                                            |

|                                                                                                  |                                                                                                                   |                                                                                       |                                  |   |    |                                        |                                                                                                                                                                                       |
|--------------------------------------------------------------------------------------------------|-------------------------------------------------------------------------------------------------------------------|---------------------------------------------------------------------------------------|----------------------------------|---|----|----------------------------------------|---------------------------------------------------------------------------------------------------------------------------------------------------------------------------------------|
|                                                                                                  |                                                                                                                   | Metabolism<br>of<br>xenobiotics<br>by<br>cytochrome<br>P450                           | mmu0<br>0980                     | 5 | 65 | 0.08889<br>0804                        | ENSMUSG00000028743 ENSMUSG00000024885 ENSMUSG0000003<br>2315 ENSMUSG00000024087 ENSMUSG00000022947                                                                                    |
| Metabolism<br>Environmental<br>Information<br>Processing<br>Genetic<br>Information<br>Processing | Xenobiotics<br>biodegradation<br>and<br>metabolism<br><br>Signal<br>transduction<br><br>Replication and<br>repair | TGF-beta<br>signaling<br>pathway<br><br>Non-homolo<br>gous<br>end-joining             | mmu0<br>4350<br><br>mmu0<br>3450 | 6 | 85 | 0.08898<br>8566                        | ENSMUSG00000021796 ENSMUSG00000067336 ENSMUSG0000008<br>1219 ENSMUSG00000007613 ENSMUSG00000020644 ENSMUSG00<br>000037035                                                             |
| Organismal<br>Systems                                                                            | Endocrine<br>system                                                                                               | Insulin<br>secretion                                                                  | mmu0<br>4911                     | 6 | 86 | 0.09262<br>1894                        | ENSMUSG00000026648 ENSMUSG00000021615<br>ENSMUSG00000053007 ENSMUSG0000002908 ENSMUSG0000003<br>1840 ENSMUSG00000015968 ENSMUSG00000027523 ENSMUSG00<br>000052889                     |
| Organismal<br>Systems                                                                            | Endocrine<br>system                                                                                               | Aldosterone<br>synthesis<br>and<br>secretion                                          | mmu0<br>4925                     | 6 | 86 | 0.09262<br>1894                        | ENSMUSG00000053007 ENSMUSG00000039145 ENSMUSG0000002<br>3034 ENSMUSG00000015968 ENSMUSG00000027523 ENSMUSG00<br>000052889                                                             |
| Metabolism                                                                                       | Carbohydrate<br>metabolism                                                                                        | Glycolysis /<br>Gluconeoge<br>nesis                                                   | mmu0<br>0010                     | 5 | 66 | 0.09310<br>3666                        | ENSMUSG00000024885 ENSMUSG00000011752 ENSMUSG0000007<br>8636 ENSMUSG00000029455 ENSMUSG00000078592                                                                                    |
| Metabolism                                                                                       | Lipid<br>metabolism                                                                                               | Fatty acid<br>biosynthesis                                                            | mmu0<br>0061                     | 2 | 14 | 0.10074<br>6367                        | ENSMUSG00000020333 ENSMUSG00000031278                                                                                                                                                 |
| Metabolism<br>Organismal<br>Systems                                                              | Carbohydrate<br>metabolism<br><br>Immune<br>system                                                                | Amino sugar<br>and<br>nucleotide<br>sugar<br>metabolism<br>Fc epsilon RI<br>signaling | mmu0<br>0520<br><br>mmu0<br>4664 | 4 | 49 | 0.10471<br>5764<br><br>0.10633<br>9757 | ENSMUSG00000001891 ENSMUSG00000042684 ENSMUSG0000002<br>2474 ENSMUSG00000029201<br>ENSMUSG00000033220 ENSMUSG00000021936 ENSMUSG0000003<br>4116 ENSMUSG00000094694 ENSMUSG00000018932 |

|             |                  |              |      |   |     |         |                                                       |
|-------------|------------------|--------------|------|---|-----|---------|-------------------------------------------------------|
|             |                  | pathway      |      |   |     |         |                                                       |
|             | Glycan           |              |      |   |     |         |                                                       |
|             | biosynthesis     | Other types  |      |   |     |         |                                                       |
|             | and              | of O-glycan  | mmu0 |   |     | 0.10723 | ENSMUSG00000028541 ENSMUSG00000028413 ENSMUSG00000003 |
| Metabolism  | metabolism       | biosynthesis | 0514 | 3 | 31  | 0761    | 4807                                                  |
| Genetic     | Folding, sorting |              |      |   |     |         |                                                       |
| Information | and              | Protein      | mmu0 |   |     | 0.10723 | ENSMUSG00000054408 ENSMUSG00000019802 ENSMUSG00000007 |
| Processing  | degradation      | export       | 3060 | 3 | 31  | 0761    | 9108                                                  |
|             | Endocrine and    | Type II      |      |   |     |         |                                                       |
| Human       | metabolic        | diabetes     | mmu0 |   |     | 0.11023 | ENSMUSG00000021936 ENSMUSG00000004113 ENSMUSG00000001 |
| Diseases    | diseases         | mellitus     | 4930 | 4 | 50  | 0929    | 5968 ENSMUSG00000020027                               |
|             |                  | Glycosphing  |      |   |     |         |                                                       |
|             | Glycan           | olipid       |      |   |     |         |                                                       |
|             | biosynthesis     | biosynthesis |      |   |     |         |                                                       |
|             | and              | - ganglio    | mmu0 |   |     | 0.11170 |                                                       |
| Metabolism  | metabolism       | series       | 0604 | 2 | 15  | 8594    | ENSMUSG00000031749 ENSMUSG00000027822                 |
|             |                  | Glycosphing  |      |   |     |         |                                                       |
|             | Glycan           | olipid       |      |   |     |         |                                                       |
|             | biosynthesis     | biosynthesis |      |   |     |         |                                                       |
|             | and              | - globo      | mmu0 |   |     | 0.11170 |                                                       |
| Metabolism  | metabolism       | series       | 0603 | 2 | 15  | 8594    | ENSMUSG00000031749 ENSMUSG00000055978                 |
|             |                  | Apoptosis -  |      |   |     |         |                                                       |
| Cellular    | Cell growth      | multiple     | mmu0 |   |     | 0.11447 | ENSMUSG00000021936 ENSMUSG00000020486 ENSMUSG00000002 |
| Processes   | and death        | species      | 4215 | 3 | 32  | 9879    | 5860                                                  |
|             |                  | Thyroid      |      |   |     |         |                                                       |
| Organismal  | Endocrine        | hormone      | mmu0 |   |     | 0.11564 | ENSMUSG00000053007 ENSMUSG00000052889 ENSMUSG00000002 |
| Systems     | system           | synthesis    | 4918 | 5 | 71  | 7956    | 8597 ENSMUSG00000020048 ENSMUSG00000027523            |
|             |                  | Arginine and |      |   |     |         |                                                       |
|             | Amino acid       | proline      | mmu0 |   |     | 0.11587 | ENSMUSG00000019987 ENSMUSG00000080845 ENSMUSG00000000 |
| Metabolism  | metabolism       | metabolism   | 0330 | 4 | 51  | 2849    | 6442 ENSMUSG00000029455                               |
| Cellular    | Cell growth      | Oocyte       | mmu0 | 7 | 116 | 0.12523 | ENSMUSG00000031309 ENSMUSG00000020300 ENSMUSG00000001 |

|                                |                                  |                                             |          |   |     |             |                                                                                                                                                                           |
|--------------------------------|----------------------------------|---------------------------------------------|----------|---|-----|-------------|---------------------------------------------------------------------------------------------------------------------------------------------------------------------------|
| Processes                      | and death                        | meiosis                                     | 4114     |   |     | 7593        | 4956 ENSMUSG00000024974 ENSMUSG00000020687 ENSMUSG0000025060 ENSMUSG00000046532                                                                                           |
|                                |                                  | Signaling pathways                          |          |   |     |             |                                                                                                                                                                           |
| Cellular Processes             | Cellular community - eukaryotes  | regulating pluripotency of stem cells       | mmu04550 | 8 | 140 | 0.131221091 | ENSMUSG00000020135 ENSMUSG00000067336 ENSMUSG00000036202 ENSMUSG00000015957 ENSMUSG00000021796 ENSMUSG0000020644 ENSMUSG00000037035 ENSMUSG00000036904                    |
| Metabolism                     | Carbohydrate metabolism          | Starch and sucrose metabolism               | mmu00500 | 4 | 54  | 0.133526025 | ENSMUSG00000003865 ENSMUSG00000025579 ENSMUSG00000001891 ENSMUSG00000029201                                                                                               |
| Genetic Information Processing | Replication and repair           | DNA replication                             | mmu03030 | 3 | 35  | 0.1372678   | ENSMUSG00000024925 ENSMUSG00000020471 ENSMUSG00000020630                                                                                                                  |
| Metabolism                     | Carbohydrate metabolism          | Fructose and mannose metabolism             | mmu00051 | 3 | 35  | 0.1372678   | ENSMUSG00000022474 ENSMUSG00000026773 ENSMUSG000000101904                                                                                                                 |
| Organismal Systems             | Immune system                    | Antigen processing and presentation         | mmu04612 | 6 | 98  | 0.142148434 | ENSMUSG00000067235 ENSMUSG00000059970 ENSMUSG00000021270 ENSMUSG00000055413 ENSMUSG00000027248 ENSMUSG0000038642                                                          |
| Genetic Information Processing | Folding, sorting and degradation | Protein processing in endoplasmic reticulum | mmu04141 | 9 | 167 | 0.145309469 | ENSMUSG00000059970 ENSMUSG00000024079 ENSMUSG00000027828 ENSMUSG00000021270 ENSMUSG00000019802 ENSMUSG0000024807 ENSMUSG00000020048 ENSMUSG00000027248 ENSMUSG00000021936 |
| Organismal Systems             | Endocrine system                 | Melanogene sis                              | mmu04916 | 6 | 99  | 0.146741233 | ENSMUSG00000015957 ENSMUSG00000021367 ENSMUSG00000019966 ENSMUSG00000027523 ENSMUSG00000036904 ENSMUSG0000052889                                                          |
| Organismal                     | Endocrine                        | Regulation                                  | mmu0     | 4 | 57  | 0.15219     | ENSMUSG00000027523 ENSMUSG00000052920 ENSMUSG0000008                                                                                                                      |

|                                            |                                           |                                                         |              |   |     |                 |                                                                                                                                                                            |
|--------------------------------------------|-------------------------------------------|---------------------------------------------------------|--------------|---|-----|-----------------|----------------------------------------------------------------------------------------------------------------------------------------------------------------------------|
| Systems                                    | system                                    | of lipolysis<br>in<br>adipocytes<br>Primary             | 4923         |   |     | 6792            | 3816 ENSMUSG00000025509                                                                                                                                                    |
| Human<br>Diseases                          | Immune<br>diseases                        | immunodeficiency                                        | mmu0<br>5340 | 3 | 37  | 0.15324<br>2672 | ENSMUSG00000026648 ENSMUSG00000094694 ENSMUSG00000026395                                                                                                                   |
| Metabolism                                 | Lipid<br>metabolism                       | Steroid<br>biosynthesis                                 | mmu0<br>0100 | 2 | 19  | 0.15815<br>0581 | ENSMUSG00000026675 ENSMUSG00000021273                                                                                                                                      |
| Metabolism                                 | Amino acid<br>metabolism                  | Alanine,<br>aspartate<br>and<br>glutamate<br>metabolism | mmu0<br>0250 | 3 | 38  | 0.16143<br>9687 | ENSMUSG00000025991 ENSMUSG00000022546 ENSMUSG00000057880                                                                                                                   |
| Cellular<br>Processes                      | Cell growth<br>and death                  | Cell cycle                                              | mmu0<br>4110 | 7 | 125 | 0.16209<br>5399 | ENSMUSG00000002297 ENSMUSG00000025862 ENSMUSG00000037286 ENSMUSG00000024974 ENSMUSG00000020687 ENSMUSG0000069089 ENSMUSG00000015312                                        |
| Environmental<br>Information<br>Processing | Signal<br>transduction                    | cGMP-PKG<br>signaling<br>pathway                        | mmu0<br>4022 | 9 | 173 | 0.16692<br>5503 | ENSMUSG00000053093 ENSMUSG00000053007 ENSMUSG00000015968 ENSMUSG00000019907 ENSMUSG00000014956 ENSMUSG00000052920 ENSMUSG00000027335 ENSMUSG00000054640 ENSMUSG00000044951 |
| Environmental<br>Information<br>Processing | Signaling<br>molecules and<br>interaction | ECM-receptor<br>interaction                             | mmu0<br>4512 | 5 | 83  | 0.17881<br>2591 | ENSMUSG00000027009 ENSMUSG00000038486 ENSMUSG00000020592 ENSMUSG00000079465 ENSMUSG000000103735                                                                            |
| Human<br>Diseases                          | Cancers:<br>Specific types                | Small cell<br>lung cancer                               | mmu0<br>5222 | 5 | 85  | 0.19040<br>9527 | ENSMUSG00000083816 ENSMUSG00000017386 ENSMUSG00000079465 ENSMUSG00000027164 ENSMUSG00000025860                                                                             |
| Organismal<br>Systems                      | Excretory<br>system                       | Proximal<br>tubule<br>bicarbonate<br>reclamation        | mmu0<br>4964 | 2 | 22  | 0.19490<br>0244 | ENSMUSG00000025792 ENSMUSG00000004655                                                                                                                                      |
| Environmental<br>Information               | Signal<br>transduction                    | ErbB<br>signaling                                       | mmu0<br>4012 | 5 | 87  | 0.20226<br>4956 | ENSMUSG00000021936 ENSMUSG00000062209 ENSMUSG00000052889 ENSMUSG00000027646 ENSMUSG00000004043                                                                             |

|                                            |                                             |                                               |              |                                    |     |                 |                                                                                                                                                                                                                                                        |
|--------------------------------------------|---------------------------------------------|-----------------------------------------------|--------------|------------------------------------|-----|-----------------|--------------------------------------------------------------------------------------------------------------------------------------------------------------------------------------------------------------------------------------------------------|
| Processing                                 |                                             | pathway                                       |              | Vasopressin<br>-regulated<br>water |     |                 |                                                                                                                                                                                                                                                        |
| Organismal<br>Systems                      | Excretory<br>system                         | reabsorption                                  | mmu0<br>4962 | 3                                  | 43  | 0.20418<br>8176 | ENSMUSG00000009013 ENSMUSG00000027523 ENSMUSG000000053007                                                                                                                                                                                              |
| Organismal<br>Systems                      | Nervous<br>system                           | Long-term<br>potentiation                     | mmu0<br>4720 | 4                                  | 66  | 0.21329<br>9446 | ENSMUSG00000031309 ENSMUSG00000068798 ENSMUSG000000052889 ENSMUSG00000014956                                                                                                                                                                           |
| Human<br>Diseases                          | Cancers:<br>Specific types                  | Pancreatic<br>cancer                          | mmu0<br>5212 | 4                                  | 66  | 0.21329<br>9446 | ENSMUSG00000033220 ENSMUSG00000021936 ENSMUSG000000026104 ENSMUSG00000007613                                                                                                                                                                           |
| Environmental<br>Information<br>Processing | Signaling<br>molecules and<br>interaction   | Neuroactive<br>ligand-receptor<br>interaction | mmu0<br>4080 | 13                                 | 285 | 0.21443<br>9586 | ENSMUSG00000028036 ENSMUSG00000027335 ENSMUSG000000059588 ENSMUSG00000059481 ENSMUSG00000045613 ENSMUSG0000032860 ENSMUSG00000049130 ENSMUSG00000027249 ENSMUSG00000068037 ENSMUSG00000038668 ENSMUSG00000040552 ENSMUSG00000053004 ENSMUSG00000057722 |
|                                            |                                             | Glycosaminoglycan<br>biosynthesis             |              |                                    |     |                 |                                                                                                                                                                                                                                                        |
|                                            |                                             | - heparan<br>sulfate /<br>heparin             | mmu0<br>0534 |                                    |     |                 | 0.21994<br>3084                                                                                                                                                                                                                                        |
| Metabolism                                 | Glycan<br>biosynthesis<br>and<br>metabolism | Progesteron<br>e-mediated                     |              | 2                                  | 24  |                 | ENSMUSG00000044499 ENSMUSG00000028838                                                                                                                                                                                                                  |
| Organismal<br>Systems                      | Endocrine<br>system                         | oocyte<br>maturation                          | mmu0<br>4914 | 5                                  | 90  | 0.22049<br>1676 | ENSMUSG00000031309 ENSMUSG00000020687 ENSMUSG000000020300 ENSMUSG00000021270 ENSMUSG00000021936                                                                                                                                                        |
| Organismal<br>Systems                      | Digestive<br>system                         | Protein<br>digestion                          | mmu0<br>4974 | 5                                  | 90  | 0.22049<br>1676 | ENSMUSG00000054640 ENSMUSG00000001865 ENSMUSG000000021999 ENSMUSG00000079465 ENSMUSG00000035000                                                                                                                                                        |
| Cellular<br>Processes                      | Cell growth<br>and death                    | p53<br>signaling                              | mmu0<br>4115 | 4                                  | 68  | 0.22771<br>404  | ENSMUSG00000022292 ENSMUSG00000037411 ENSMUSG000000020649 ENSMUSG00000015312                                                                                                                                                                           |



|                                      |                                |                                   |                   |   |     |             |                                                                                                                                     |
|--------------------------------------|--------------------------------|-----------------------------------|-------------------|---|-----|-------------|-------------------------------------------------------------------------------------------------------------------------------------|
|                                      |                                | pathway                           |                   |   |     |             |                                                                                                                                     |
|                                      |                                | Chemical                          |                   |   |     |             |                                                                                                                                     |
| Human Diseases                       | Cancers: Overview              | carcinogenesis                    | mmu05204          | 5 | 93  | 0.239193397 | ENSMUSG00000024885 ENSMUSG00000032315 ENSMUSG00000024087 ENSMUSG00000083816 ENSMUSG00000003053                                      |
| Organismal Systems                   | Endocrine system               | Thyroid hormone signaling pathway | mmu04919          | 6 | 117 | 0.239419571 | ENSMUSG00000013833 ENSMUSG00000101904 ENSMUSG00000027646 ENSMUSG00000026104 ENSMUSG00000052889 ENSMUSG0000015468                    |
| Metabolism                           | Carbohydrate metabolism        | Inositol phosphate metabolism     | mmu00562          | 4 | 70  | 0.242364379 | ENSMUSG00000019139 ENSMUSG00000027296 ENSMUSG00000025178 ENSMUSG00000030660                                                         |
| Organismal Systems                   | Endocrine system               | Insulin signaling pathway         | mmu04910          | 7 | 142 | 0.242684596 | ENSMUSG00000003865 ENSMUSG00000020027 ENSMUSG00000006542 ENSMUSG00000014956 ENSMUSG00000028518 ENSMUSG0000021936 ENSMUSG00000029167 |
| Environmental Information Processing | Signal transduction            | Hippo signaling pathway           | -multiple species | 2 | 26  | 0.245226792 | ENSMUSG00000006262 ENSMUSG00000022329                                                                                               |
| Organismal Systems                   | Development                    | Dorso-ventral axis formation      | mmu04320          | 2 | 26  | 0.245226792 | ENSMUSG00000020300 ENSMUSG00000015468                                                                                               |
| Organismal Systems                   | Digestive system               | Bile secretion                    | mmu04976          | 4 | 71  | 0.249768207 | ENSMUSG00000027523 ENSMUSG00000021135 ENSMUSG00000029802 ENSMUSG00000004655                                                         |
| Human Diseases                       | Drug resistance:               | Endocrine resistance              | mmu01522          | 5 | 95  | 0.251892993 | ENSMUSG00000021936 ENSMUSG00000015468 ENSMUSG00000027314 ENSMUSG00000027646 ENSMUSG00000027523                                      |
| Human Diseases                       | Antineoplastic Immune diseases | Allograft rejection               | mmu05330          | 4 | 72  | 0.257219332 | ENSMUSG00000067235 ENSMUSG00000055413 ENSMUSG00000094694 ENSMUSG00000015437                                                         |
| Organismal Systems                   | Endocrine system               | Renin secretion                   | mmu04924          | 4 | 72  | 0.257219332 | ENSMUSG00000027523 ENSMUSG00000004655 ENSMUSG00000004347 ENSMUSG00000015968                                                         |

|                                           |                                          |                                                     |          |   |    |             |                                                                                                  |
|-------------------------------------------|------------------------------------------|-----------------------------------------------------|----------|---|----|-------------|--------------------------------------------------------------------------------------------------|
| Organismal Systems                        | Aging Glycan biosynthesis and metabolism | Longevity regulating pathway                        | mmu04211 | 5 | 96 | 0.258305088 | ENSMUSG00000053007 ENSMUSG00000029167 ENSMUSG00000006542 ENSMUSG00000028518 ENSMUSG00000040760   |
| Metabolism Human Diseases                 | Substance dependence                     | N-Glycan biosynthesis Cocaine addiction             | mmu00510 | 3 | 49 | 0.258315296 | ENSMUSG00000028541 ENSMUSG00000028413 ENSMUSG000000032123                                        |
| Human Diseases                            | Cancers: Overview                        | Choline metabolism in cancer                        | mmu05231 | 3 | 49 | 0.258315296 | ENSMUSG00000027523 ENSMUSG00000020182 ENSMUSG000000053007                                        |
| Metabolism Genetic Information Processing | Amino acid metabolism                    | Phenylalanine, tyrosine and tryptophan biosynthesis | mmu00400 | 1 | 9  | 0.290892547 | ENSMUSG00000033220 ENSMUSG00000021936 ENSMUSG000000052889 ENSMUSG00000029684 ENSMUSG000000057193 |
| Human Diseases                            | Infectious diseases: Bacterial           | RNA polymerase                                      | mmu03020 | 2 | 30 | 0.291750046 | ENSMUSG00000001670                                                                               |
| Organismal Systems                        | Digestive system                         | Bacterial invasion of epithelial cells              | mmu05100 | 4 | 78 | 0.29596175  | ENSMUSG00000027427 ENSMUSG00000035834                                                            |
| Human Diseases                            | Infectious diseases: Bacterial           | Salivary secretion                                  | mmu04970 | 4 | 78 | 0.302708732 | ENSMUSG00000022831 ENSMUSG00000027646 ENSMUSG000000061665 ENSMUSG00000029684                     |
| Organismal Systems                        | Excretory system                         | Salmonella infection                                | mmu05132 | 4 | 78 | 0.302708732 | ENSMUSG00000027523 ENSMUSG00000052920 ENSMUSG000000052889 ENSMUSG00000027335                     |
| Human Diseases                            | Excretory system                         | Endocrine and other                                 | mmu04961 | 3 | 54 | 0.304699958 | ENSMUSG00000021936 ENSMUSG00000025888 ENSMUSG000000029684 ENSMUSG00000039005                     |
| Organismal Systems                        |                                          |                                                     |          |   |    |             | ENSMUSG00000027523 ENSMUSG00000052889 ENSMUSG000000054640                                        |

|                                      |                                  |                                            |          |   |     |             |                                                                                                                                     |
|--------------------------------------|----------------------------------|--------------------------------------------|----------|---|-----|-------------|-------------------------------------------------------------------------------------------------------------------------------------|
|                                      |                                  | factor-regulated calcium reabsorption      |          |   |     |             |                                                                                                                                     |
|                                      |                                  | Pentose phosphate pathway                  | mmu0030  |   |     | 0.308593542 |                                                                                                                                     |
| Metabolism                           | Carbohydrate metabolism          |                                            |          | 2 | 31  |             | ENSMUSG00000023070 ENSMUSG00000026005                                                                                               |
| Human Diseases                       | Cancers: Specific types          | Basal cell carcinoma                       | mmu05217 | 3 | 55  | 0.314036718 | ENSMUSG00000015957 ENSMUSG00000036904 ENSMUSG00000020135                                                                            |
| Environmental Information Processing | Signal transduction              | mTOR signaling pathway                     | mmu04150 | 7 | 156 | 0.316623941 | ENSMUSG00000050310 ENSMUSG00000031309 ENSMUSG00000015957 ENSMUSG00000035992 ENSMUSG00000028518 ENSMUSG0000036904 ENSMUSG00000052889 |
| Organismal Systems                   | Immune system                    | T cell receptor signaling pathway          | mmu04660 | 5 | 105 | 0.31745305  | ENSMUSG00000004266 ENSMUSG00000024235 ENSMUSG00000034116 ENSMUSG00000030595 ENSMUSG00000026395                                      |
| Metabolism                           | Carbohydrate metabolism          | Citrate cycle (TCA cycle)                  | mmu00020 | 2 | 32  | 0.321178716 | ENSMUSG00000024892 ENSMUSG00000021913                                                                                               |
| Genetic Information Processing       | Folding, sorting and degradation | SNARE interactions in vesicular transport  | mmu04130 | 2 | 33  | 0.333705918 | ENSMUSG00000051412 ENSMUSG00000039232                                                                                               |
| Metabolism                           | Lipid metabolism                 | Synthesis and degradation of ketone bodies | mmu00072 | 1 | 11  | 0.338972853 | ENSMUSG00000046598                                                                                                                  |
| Genetic Information Processing       | Translation                      | Ribosome biogenesis in eukaryotes          | mmu03008 | 4 | 83  | 0.341245266 | ENSMUSG00000041747 ENSMUSG00000030521 ENSMUSG00000042354 ENSMUSG00000021428                                                         |

|                                                              |                                       |                                                    |                          |       |           |                                   |                                                                                                                                                                                                    |
|--------------------------------------------------------------|---------------------------------------|----------------------------------------------------|--------------------------|-------|-----------|-----------------------------------|----------------------------------------------------------------------------------------------------------------------------------------------------------------------------------------------------|
| Genetic Information Processing Organismal Systems            | Replication and repair Nervous system | Base excision repair Long-term depression          | mmu0 3410 mmu0 4730      | 2 3   | 35 61     | 0.35854 5065 0.36998 8687         | ENSMUSG00000066551 ENSMUSG00000020471<br>ENSMUSG00000027523 ENSMUSG00000052920 ENSMUSG00000052889                                                                                                  |
| Human Diseases Organismal Systems                            | Immune diseases Nervous system        | Autoimmun e thyroid disease Synaptic vesicle cycle | mmu0 5320 mmu0 4721      | 4 3   | 87 62     | 0.37218 2811 0.37925 4207         | ENSMUSG00000067235 ENSMUSG00000055413 ENSMUSG00000094694 ENSMUSG00000015437<br>ENSMUSG00000034799 ENSMUSG00000004113 ENSMUSG00000031840                                                            |
| Human Diseases                                               | Cancers: Specific types               | Prostate cancer                                    | mmu0 5215                | 4     | 89        | 0.38761 9725                      | ENSMUSG00000021270 ENSMUSG00000020048 ENSMUSG00000046532 ENSMUSG00000053007                                                                                                                        |
| Organismal Systems                                           | Aging                                 | Longevity regulating pathway - multiple species    | mmu0 4213                | 3     | 64        | 0.39769 1584                      | ENSMUSG00000059970 ENSMUSG00000006542 ENSMUSG00000028518                                                                                                                                           |
| Metabolism                                                   | Metabolism of cofactors and vitamins  | Folate biosynthesis                                | mmu0 0790                | 1     | 14        | 0.40397 353                       | ENSMUSG00000073987                                                                                                                                                                                 |
| Environmental Information Processing                         | Signal transduction                   | Phospholipase D signaling pathway                  | mmu0 4072                | 6     | 146       | 0.41142 2149                      | ENSMUSG00000038387 ENSMUSG00000028036 ENSMUSG00000019966 ENSMUSG00000094694 ENSMUSG00000038668 ENSMUSG0000027523                                                                                   |
| Cellular Processes Genetic Information Processing Metabolism | Transport and catabolism              | Regulation of autophagy                            | mmu0 4140 mmu0 3010 mmu0 | 2 6 2 | 40 148 41 | 0.41898 1814 0.42350 7834 0.43072 | ENSMUSG00000079418 ENSMUSG00000028518<br>ENSMUSG00000023939 ENSMUSG00000029486 ENSMUSG00000024181 ENSMUSG00000031781 ENSMUSG00000015672 ENSMUSG0000003299<br>ENSMUSG00000017713 ENSMUSG00000011752 |

|                                                    |                                       |                                                          |              |   |     |                 |                                                                                                    |
|----------------------------------------------------|---------------------------------------|----------------------------------------------------------|--------------|---|-----|-----------------|----------------------------------------------------------------------------------------------------|
|                                                    | metabolism                            | serine and<br>threonine<br>metabolism                    | 0260         |   |     | 673             |                                                                                                    |
| Organismal<br>Systems                              | Nervous<br>system                     | n signaling<br>pathway                                   | mmu0<br>4722 | 5 | 122 | 0.43177<br>4049 | ENSMUSG00000031309 ENSMUSG00000021936 ENSMUSG0000006<br>8798 ENSMUSG00000027164 ENSMUSG00000030595 |
| Environmental<br>Information<br>Processing         | Signal<br>transduction                | Phosphatidy<br>linositol<br>signaling<br>system          | mmu0<br>4070 | 4 | 97  | 0.44864<br>2392 | ENSMUSG00000030660 ENSMUSG00000027296 ENSMUSG0000005<br>2889 ENSMUSG00000025178                    |
| Metabolism                                         | Energy<br>metabolism                  | Nitrogen<br>metabolism                                   | mmu0<br>0910 | 1 | 17  | 0.46258<br>6749 | ENSMUSG00000025991                                                                                 |
| Metabolism<br>Genetic<br>Information<br>Processing | Metabolism of<br>other amino<br>acids | Selenocomp<br>ound<br>metabolism                         | mmu0<br>0450 | 1 | 17  | 0.46258<br>6749 | ENSMUSG00000003477                                                                                 |
| Organismal<br>Systems                              | Transcription                         | Basal<br>transcriptio<br>n factors                       | mmu0<br>3022 | 2 | 44  | 0.46517<br>5375 | ENSMUSG00000069089 ENSMUSG00000001524                                                              |
| Human<br>Diseases                                  | Immune<br>system                      | Intestinal<br>immune<br>network for<br>IgA<br>production | mmu0<br>4672 | 2 | 44  | 0.46517<br>5375 | ENSMUSG00000027009 ENSMUSG00000094694                                                              |
| Organismal<br>Systems                              | Immune<br>diseases                    | Graft-versus<br>-host<br>disease                         | mmu0<br>5332 | 3 | 72  | 0.46961<br>4918 | ENSMUSG00000067235 ENSMUSG00000055413 ENSMUSG0000001<br>5437                                       |
| Organismal<br>Systems                              | Digestive<br>system                   | Carbohydrat<br>e digestion<br>and<br>absorption          | mmu0<br>4973 | 2 | 45  | 0.47638<br>1669 | ENSMUSG00000052889 ENSMUSG00000015968                                                              |
| Organismal                                         | Digestive                             | Gastric acid                                             | mmu0         | 3 | 73  | 0.47834         | ENSMUSG00000027523 ENSMUSG00000052889 ENSMUSG0000004                                               |

|               |               |              |      |   |    |         |                                                      |
|---------------|---------------|--------------|------|---|----|---------|------------------------------------------------------|
| Systems       | system        | secretion    | 4971 |   |    | 3503    | 4951                                                 |
|               | Glycan        |              |      |   |    |         |                                                      |
|               | biosynthesis  | Other        |      |   |    |         |                                                      |
|               | and           | glycan       | mmu0 |   |    | 0.48081 |                                                      |
| Metabolism    | metabolism    | degradation  | 0511 | 1 | 18 | 5304    | ENSMUSG00000019810                                   |
|               | Metabolism of | Pantothenat  |      |   |    |         |                                                      |
|               | cofactors and | e and CoA    | mmu0 |   |    | 0.48081 |                                                      |
| Metabolism    | vitamins      | biosynthesis | 0770 | 1 | 18 | 5304    | ENSMUSG00000030826                                   |
|               | Metabolism of | One carbon   |      |   |    |         |                                                      |
|               | cofactors and | pool by      | mmu0 |   |    | 0.49842 |                                                      |
| Metabolism    | vitamins      | folate       | 0670 | 1 | 19 | 6003    | ENSMUSG00000029376                                   |
|               | Lipid         | Sphingolipid | mmu0 |   |    | 0.50912 |                                                      |
| Metabolism    | metabolism    | metabolism   | 0600 | 2 | 48 | 178     | ENSMUSG00000030760 ENSMUSG00000057342                |
|               | Endocrine and | Type I       |      |   |    |         |                                                      |
| Human         | metabolic     | diabetes     | mmu0 |   |    | 0.51255 | ENSMUSG00000067235 ENSMUSG00000055413 ENSMUSG0000001 |
| Diseases      | diseases      | mellitus     | 4940 | 3 | 77 | 436     | 5437                                                 |
|               |               | Glycosamin   |      |   |    |         |                                                      |
|               |               | oglycan      |      |   |    |         |                                                      |
|               |               | biosynthesis |      |   |    |         |                                                      |
|               |               | -            |      |   |    |         |                                                      |
|               | Glycan        | chondroitin  |      |   |    |         |                                                      |
|               | biosynthesis  | sulfate /    |      |   |    |         |                                                      |
|               | and           | dermatan     | mmu0 |   |    | 0.51543 |                                                      |
| Metabolism    | metabolism    | sulfate      | 0532 | 1 | 20 | 9774    | ENSMUSG00000032997                                   |
| Environmental |               | Notch        |      |   |    |         |                                                      |
| Information   | Signal        | signaling    | mmu0 |   |    | 0.51973 |                                                      |
| Processing    | transduction  | pathway      | 4330 | 2 | 49 | 3155    | ENSMUSG00000027314 ENSMUSG00000015468                |
|               | Glycan        |              |      |   |    |         |                                                      |
|               | biosynthesis  | Glycosamin   |      |   |    |         |                                                      |
|               | and           | oglycan      | mmu0 |   |    | 0.53187 |                                                      |
| Metabolism    | metabolism    | degradation  | 0531 | 1 | 21 | 6836    | ENSMUSG00000035273                                   |

|                                |                                           |                                                         |          |   |    |             |                                                           |
|--------------------------------|-------------------------------------------|---------------------------------------------------------|----------|---|----|-------------|-----------------------------------------------------------|
| Genetic Information Processing | Replication and repair                    | Fanconi anemia pathway                                  | mmu03460 | 2 | 51 | 0.540490207 | ENSMUSG00000045102 ENSMUSG00000028560                     |
| Metabolism                     | Xenobiotics biodegradation and metabolism | Drug metabolism - other enzymes                         | mmu00983 | 2 | 51 | 0.540490207 | ENSMUSG00000056973 ENSMUSG00000003500                     |
| Genetic Information Processing | Replication and repair                    | Mismatch repair                                         | mmu03430 | 1 | 22 | 0.547756723 | ENSMUSG00000020471                                        |
| Human Diseases                 | Neurodegenerative diseases                | Amyotrophic lateral sclerosis (ALS)                     | mmu05014 | 2 | 52 | 0.550632744 | ENSMUSG00000018932 ENSMUSG00000025888                     |
| Metabolism                     | Glycan biosynthesis and metabolism        | Glycosylphosphatidylinositol(GPI)-anchored biosynthesis | mmu00563 | 1 | 25 | 0.592238899 | ENSMUSG00000010607                                        |
| Human Diseases                 | Immune diseases                           | Asthma                                                  | mmu05310 | 1 | 26 | 0.60607254  | ENSMUSG000000094694                                       |
| Metabolism                     | Metabolism of cofactors and vitamins      | Retinol metabolism                                      | mmu00830 | 3 | 89 | 0.607393944 | ENSMUSG00000024747 ENSMUSG00000032315 ENSMUSG00000003053  |
| Organismal Systems             | Taste transduction                        | Sensory system                                          | mmu04742 | 3 | 89 | 0.607393944 | ENSMUSG00000015085 ENSMUSG00000004347 ENSMUSG000000023439 |
| Human Diseases                 | Endocrine and metabolic diseases          | Maturation onset of diabetes                            | mmu04950 | 1 | 27 | 0.619437197 | ENSMUSG00000017950                                        |
| Genetic                        | Replication and                           | Homologous                                              | mmu0     | 1 | 28 | 0.63234     | ENSMUSG00000020471                                        |

|                        |                                      |                              |          |   |     |             |                                                                             |
|------------------------|--------------------------------------|------------------------------|----------|---|-----|-------------|-----------------------------------------------------------------------------|
| Information Processing | repair                               | recombination                | 3440     |   |     | 8759        |                                                                             |
| Environmental          |                                      | Sphingolipid                 |          |   |     |             |                                                                             |
| Information Processing | Signal transduction                  | signaling pathway            | mmu04071 | 4 | 125 | 0.640484109 | ENSMUSG00000033220 ENSMUSG00000021936 ENSMUSG00000052889 ENSMUSG00000057342 |
| Genetic                |                                      | mRNA                         |          |   |     |             |                                                                             |
| Information Processing | Translation                          | surveillance pathway         | mmu03015 | 3 | 96  | 0.656710125 | ENSMUSG00000028274 ENSMUSG00000014956 ENSMUSG00000027176                    |
|                        |                                      | Glyoxylate and dicarboxylate |          |   |     |             |                                                                             |
| Metabolism             | Carbohydrate metabolism              | metabolism                   | mmu00630 | 1 | 30  | 0.656873475 | ENSMUSG00000032527                                                          |
|                        |                                      | Central carbon               |          |   |     |             |                                                                             |
| Human Diseases         | Cancers: Overview                    | metabolism in cancer         | mmu05230 | 2 | 66  | 0.675823547 | ENSMUSG00000011752 ENSMUSG00000034748                                       |
|                        |                                      | Nicotinate and nicotinamide  |          |   |     |             |                                                                             |
| Metabolism             | Metabolism of cofactors and vitamins | metabolism                   | mmu00760 | 1 | 35  | 0.711269106 | ENSMUSG00000029780                                                          |
| Human Diseases         | Cancers: Specific types              | Melanoma                     | mmu05218 | 2 | 72  | 0.720100634 | ENSMUSG00000022523 ENSMUSG00000057967                                       |
|                        |                                      | Chronic                      |          |   |     |             |                                                                             |
| Human Diseases         | Cancers: Specific types              | myeloid leukemia             | mmu05220 | 2 | 73  | 0.726963256 | ENSMUSG00000007613 ENSMUSG00000004043                                       |
| Human Diseases         | Substance dependence                 | Nicotine addiction           | mmu05033 | 1 | 40  | 0.757046767 | ENSMUSG00000004113                                                          |
| Organismal Systems     | Excretory system                     | Aldosterone -regulated       | mmu04960 | 1 | 40  | 0.757046767 | ENSMUSG00000052889                                                          |



|               |                     |                            |      |   |     |         |                                                      |
|---------------|---------------------|----------------------------|------|---|-----|---------|------------------------------------------------------|
|               |                     | sodium<br>reabsorption     |      |   |     |         |                                                      |
| Human         | Drug<br>resistance: | Platinum<br>drug           | mmu0 |   |     | 0.75916 |                                                      |
| Diseases      | Antineoplastic      | resistance                 | 1524 | 2 | 78  | 5651    | ENSMUSG00000025860 ENSMUSG00000017485                |
| Human         | Cancers:            | Bladder                    | mmu0 |   |     | 0.76529 |                                                      |
| Diseases      | Specific types      | cancer                     | 5219 | 1 | 41  | 2253    | ENSMUSG00000027646                                   |
|               |                     | EGFR<br>tyrosine<br>kinase |      |   |     |         |                                                      |
| Human         | Drug<br>resistance: | inhibitor                  | mmu0 |   |     | 0.78250 |                                                      |
| Diseases      | Antineoplastic      | resistance                 | 1521 | 2 | 82  | 9194    | ENSMUSG00000052889 ENSMUSG00000027646                |
| Environmental |                     | Hedgehog                   |      |   |     |         |                                                      |
| Information   | Signal              | signaling                  | mmu0 |   |     | 0.78838 |                                                      |
| Processing    | transduction        | pathway                    | 4340 | 1 | 44  | 8456    | ENSMUSG00000029122                                   |
| Genetic       | Folding, sorting    |                            |      |   |     |         |                                                      |
| Information   | and                 |                            | mmu0 |   |     | 0.79557 |                                                      |
| Processing    | degradation         | Proteasome                 | 3050 | 1 | 45  | 0968    | ENSMUSG00000036743                                   |
| Human         | Cancers:            | Endometrial                | mmu0 |   |     | 0.83947 |                                                      |
| Diseases      | Specific types      | cancer                     | 5213 | 1 | 52  | 0673    | ENSMUSG00000020135                                   |
|               |                     |                            |      |   |     |         | ENSMUSG00000083816 ENSMUSG00000024087 ENSMUSG0000002 |
| Human         | Cancers:            | MicroRNAs                  | mmu0 |   |     | 0.85967 | 0135 ENSMUSG00000067336 ENSMUSG00000024975 ENSMUSG00 |
| Diseases      | Overview            | in cancer                  | 5206 | 7 | 281 | 4851    | 000052889 ENSMUSG00000015468                         |
|               |                     | Non-small                  |      |   |     |         |                                                      |
| Human         | Cancers:            | cell lung                  | mmu0 |   |     | 0.86018 |                                                      |
| Diseases      | Specific types      | cancer                     | 5223 | 1 | 56  | 5332    | ENSMUSG00000052889                                   |
| Human         | Cancers:            |                            | mmu0 |   |     | 0.89754 |                                                      |
| Diseases      | Specific types      | Glioma                     | 5214 | 1 | 65  | 6528    | ENSMUSG00000052889                                   |
| Genetic       |                     | Aminoacyl-t                | mmu0 |   |     | 0.90102 |                                                      |
| Information   | Translation         | RNA                        | 0970 | 1 | 66  | 5828    | ENSMUSG00000038838                                   |

|            |                |              |      |   |      |         |  |                                                       |  |
|------------|----------------|--------------|------|---|------|---------|--|-------------------------------------------------------|--|
| Processing |                | biosynthesis |      |   |      |         |  |                                                       |  |
|            |                | Drug         |      |   |      |         |  |                                                       |  |
|            | Xenobiotics    | metabolism   |      |   |      |         |  |                                                       |  |
|            | biodegradation | -            |      |   |      |         |  |                                                       |  |
|            | and            | cytochrome   | mmu0 |   |      | 0.90438 |  |                                                       |  |
| Metabolism | metabolism     | P450         | 0982 | 1 | 67   | 7056    |  | ENSMUSG00000024885                                    |  |
| Human      | Cancers:       | Renal cell   | mmu0 |   |      | 0.90763 |  |                                                       |  |
| Diseases   | Specific types | carcinoma    | 5211 | 1 | 68   | 4216    |  | ENSMUSG00000068798                                    |  |
| Organismal |                | Olfactory    | mmu0 |   |      |         |  | ENSMUSG00000054640 ENSMUSG00000052920 ENSMUSG00000000 |  |
| Systems    | Sensory system | transduction | 4740 | 3 | 1102 | 1       |  | 4347                                                  |  |

**Table SVI. The DEGs in the metabolic related pathways of DbCM / CK.**

**DbCM\_vs\_CK.DEG.kegg.Amino\_acid\_metabolism**

| Gene_ID             | CK-1            | CK-2            | CK-3            | DbCM-1          | DbCM-2          | DbCM-3          | KEGG_ID | symbol | ncbi_description                                                                                     |
|---------------------|-----------------|-----------------|-----------------|-----------------|-----------------|-----------------|---------|--------|------------------------------------------------------------------------------------------------------|
| ENSMUSG00000000326  | 3.2124<br>5641  | 1.79971<br>3905 | 2.3832<br>10404 | 3.920393<br>156 | 3.77233<br>6607 | 4.310600<br>146 | K00545  | Comt   | catechol-O-methyltransferase                                                                         |
| ENSMUSG000000001270 | 31.853<br>06475 | 24.9433<br>6758 | 28.427<br>68105 | 19.27965<br>865 | 19.8388<br>8939 | 16.71971<br>06  | K00933  | Ckb    | creatine kinase, brain                                                                               |
| ENSMUSG000000003477 | 25.028<br>17991 | 26.4699<br>0988 | 30.980<br>21296 | 83.92356<br>779 | 82.4700<br>0452 | 74.70460<br>531 | K00562  | Inmt   | indolethylamine N-methyltransferase                                                                  |
| ENSMUSG000000011179 | 46.832<br>82395 | 48.1274<br>7328 | 47.150<br>80372 | 63.71805<br>663 | 58.8576<br>1995 | 54.60635<br>96  | K01581  | Odc1   | ornithine decarboxylase, structural 1                                                                |
| ENSMUSG000000019055 | 42.398<br>05277 | 39.2076<br>7303 | 34.958<br>52168 | 24.55025<br>531 | 27.3587<br>6508 | 23.98880<br>09  | K00473  | Plod1  | procollagen-lysine, 2-oxoglutarate<br>5-dioxygenase 1                                                |
| ENSMUSG000000019916 | 9.8353<br>09773 | 10.7696<br>6918 | 11.568<br>67269 | 5.760274<br>564 | 6.56476<br>2083 | 7.777530<br>333 | K00472  | P4ha1  | procollagen-proline, 2-oxoglutarate<br>4-dioxygenase (proline 4-hydroxylase), alpha 1<br>polypeptide |
| ENSMUSG000000020534 | 5.3944<br>68117 | 5.83667<br>113  | 6.4104<br>40815 | 7.117940<br>109 | 7.55759<br>4555 | 7.147986<br>931 | K00600  | Shmt1  | serine hydroxymethyltransferase 1 (soluble)                                                          |
| ENSMUSG000000020826 | 8.3608<br>40499 | 7.02517<br>5733 | 7.4649<br>02429 | 4.942921<br>967 | 5.11354<br>2907 | 4.962047<br>295 | K13241  | Nos2   | nitric oxide synthase 2, inducible                                                                   |
| ENSMUSG000000022186 | 262.47<br>39732 | 263.246<br>2315 | 289.43<br>28376 | 153.3752<br>575 | 177.412<br>5371 | 173.2131<br>516 | K01027  | Oxct1  | 3-oxoacid CoA transferase 1                                                                          |
| ENSMUSG000000024087 | 3.2804<br>23378 | 2.88578<br>7564 | 2.5230<br>88647 | 6.348274<br>56  | 5.34169<br>7863 | 5.780421<br>416 | K07410  | Cyp1b1 | cytochrome P450, family 1, subfamily b,<br>polypeptide 1                                             |
| ENSMUSG000000024640 | 2.8497<br>78267 | 2.01230<br>4495 | 1.8268<br>45735 | 3.761648<br>644 | 3.65158<br>1576 | 4.143651<br>764 | K00831  | Psat1  | phosphoserine aminotransferase 1                                                                     |
| ENSMUSG000000024827 | 0.1781<br>74544 | 0.21943<br>6138 | 0.1246<br>81876 | 0.516418<br>331 | 0.38358<br>3826 | 0.503034<br>104 | K00281  | Gldc   | glycine decarboxylase                                                                                |

|                    |                 |                 |                 |                 |                 |                 |        |          |                                                                                                                                                |
|--------------------|-----------------|-----------------|-----------------|-----------------|-----------------|-----------------|--------|----------|------------------------------------------------------------------------------------------------------------------------------------------------|
| ENSMUSG00000024903 | 0               | 0.01252<br>4528 | 0               | 0.235800<br>574 | 0.44582<br>9539 | 0.121804<br>896 | K03334 | Lao1     | L-amino acid oxidase 1                                                                                                                         |
| ENSMUSG00000025190 | 383.81<br>86428 | 364.020<br>3343 | 401.43<br>43311 | 507.3705<br>724 | 527.538<br>7285 | 494.3837<br>01  | K14454 | Got1     | glutamic-oxaloacetic transaminase 1, soluble                                                                                                   |
| ENSMUSG00000025745 | 507.02<br>03499 | 498.376<br>921  | 532.21<br>59723 | 630.9247<br>22  | 650.948<br>7928 | 648.9368<br>613 | K07515 | Hadha    | hydroxyacyl-Coenzyme A<br>dehydrogenase/3-ketoacyl-Coenzyme A<br>thiolase/enoyl-Coenzyme A hydratase<br>(trifunctional protein), alpha subunit |
| ENSMUSG00000026473 | 241.01<br>50024 | 212.400<br>1753 | 232.51<br>91055 | 272.3307<br>751 | 337.839<br>6187 | 283.7626<br>977 | K01915 | Glul     | glutamate-ammonia ligase (glutamine<br>synthetase)                                                                                             |
| ENSMUSG00000026687 | 18.296<br>52714 | 19.9662<br>4489 | 17.040<br>57891 | 23.65845<br>339 | 22.5334<br>987  | 24.20158<br>882 | K00149 | Aldh9a1  | aldehyde dehydrogenase 9, subfamily A1                                                                                                         |
| ENSMUSG00000027187 | 132.09<br>68003 | 130.425<br>8057 | 133.55<br>10921 | 159.4836<br>847 | 164.735<br>5343 | 168.1569<br>173 | K03781 | Cat      | catalase                                                                                                                                       |
| ENSMUSG00000027875 | 28.899<br>53743 | 34.8123<br>1421 | 32.253<br>77747 | 93.69084<br>259 | 97.1256<br>0815 | 90.61036<br>974 | K01641 | Hmgcs2   | 3-hydroxy-3-methylglutaryl-Coenzyme A<br>synthase 2                                                                                            |
| ENSMUSG00000032315 | 0.7688<br>12919 | 1.66899<br>4376 | 1.3016<br>01119 | 8.523049<br>765 | 10.8360<br>8469 | 9.293320<br>655 | K07408 | Cyp1a1   | cytochrome P450, family 1, subfamily a,<br>polypeptide 1                                                                                       |
| ENSMUSG00000032350 | 4.7776<br>23142 | 5.44052<br>9881 | 4.8249<br>14376 | 6.156356<br>375 | 6.15716<br>5774 | 6.168750<br>784 | K11204 | Gclc     | glutamate-cysteine ligase, catalytic subunit                                                                                                   |
| ENSMUSG00000032374 | 5.4323<br>77938 | 6.62615<br>2378 | 6.6901<br>61732 | 4.543282<br>417 | 3.76137<br>8653 | 4.561668<br>178 | K13645 | Plod2    | procollagen lysine, 2-oxoglutarate<br>5-dioxygenase 2                                                                                          |
| ENSMUSG00000032649 | 4.4612<br>93831 | 4.70808<br>1198 | 4.4353<br>47441 | 3.174045<br>515 | 3.39020<br>5236 | 3.082794<br>726 | K11703 | Colgalt2 | collagen beta(1-O)galactosyltransferase 2                                                                                                      |
| ENSMUSG00000033307 | 172.12<br>18364 | 148.865<br>7898 | 143.92<br>7147  | 208.9277<br>22  | 222.377<br>7539 | 169.4305<br>496 | K07253 | Mif      | macrophage migration inhibitory factor<br>(glycosylation-inhibiting factor)                                                                    |
| ENSMUSG00000036880 | 795.33<br>39203 | 766.379<br>4719 | 808.36<br>1652  | 1063.602<br>428 | 1116.74<br>6467 | 1042.098<br>943 | K07508 | Acaa2    | acetyl-Coenzyme A acyltransferase 2<br>(mitochondrial 3-oxoacyl-Coenzyme A thiolase)                                                           |
| ENSMUSG00000039783 | 0.7377<br>2122  | 0.75312<br>9345 | 0.5189<br>69391 | 0.322255<br>53  | 0.08912<br>4931 | 0.257133<br>718 | K00486 | Kmo      | kynurenine 3-monooxygenase (kynurenine<br>3-hydroxylase)                                                                                       |
| ENSMUSG00000048087 | 3.4194          | 3.76712         | 3.9294          | 4.330504        | 5.42577         | 4.319819        | K01251 | Gm4737   | predicted gene 4737                                                                                                                            |

|                    |                         |                         |                          |                        |                         |                        |        |       |                                                                                                                                               |
|--------------------|-------------------------|-------------------------|--------------------------|------------------------|-------------------------|------------------------|--------|-------|-----------------------------------------------------------------------------------------------------------------------------------------------|
| ENSMUSG00000057880 | 35961<br>5.5041<br>5988 | 4337<br>5.40680<br>3129 | 83229<br>6.2451<br>66559 | 214<br>3.024941<br>367 | 9306<br>3.34608<br>3641 | 661<br>3.042644<br>793 | K13524 | Abat  | 4-aminobutyrate aminotransferase                                                                                                              |
| ENSMUSG00000059447 | 330.70<br>66819         | 336.447<br>3266         | 355.95<br>61331          | 407.2224<br>733        | 414.222<br>1469         | 427.3146<br>874        | K07509 | Hadhb | hydroxyacyl-Coenzyme A<br>dehydrogenase/3-ketoacyl-Coenzyme A<br>thiolase/enoyl-Coenzyme A hydratase<br>(trifunctional protein), beta subunit |
| ENSMUSG00000063558 | 7.1266<br>76922         | 8.73130<br>8507         | 8.8716<br>65566          | 9.528046<br>683        | 10.1402<br>2955         | 11.04602<br>734        | K00157 | Aox1  | aldehyde oxidase 1                                                                                                                            |
| ENSMUSG00000069835 | 3.7854<br>19911         | 3.12733<br>5225         | 3.3564<br>1787           | 5.303044<br>342        | 4.99275<br>0555         | 4.167885<br>408        | K00657 | Sat2  | spermidine/spermine N1-acetyl transferase 2                                                                                                   |
| ENSMUSG00000074207 | 6.3210<br>64398         | 5.26486<br>0001         | 5.4002<br>98678          | 9.837957<br>108        | 8.66423<br>3558         | 7.920069<br>471        | K13951 | Adh1  | alcohol dehydrogenase 1 (class I)                                                                                                             |

#### DbCM\_vs\_CK.DEG.kegg.Lipid\_metabolism

| Gene_ID            | CK-1            | CK-2            | CK-3            | DbCM-1          | DbCM-2          | DbCM-3          | KEGG_ID | symbol | ncbi_description                                  |
|--------------------|-----------------|-----------------|-----------------|-----------------|-----------------|-----------------|---------|--------|---------------------------------------------------|
| ENSMUSG00000000320 | 4.30161<br>2039 | 3.80373<br>383  | 3.48696<br>7527 | 6.54385<br>7002 | 5.53987<br>0276 | 5.68235<br>0609 | K00458  | Alox12 | arachidonate 12-lipoxygenase                      |
| ENSMUSG00000000326 | 3.21245<br>641  | 1.79971<br>3905 | 2.38321<br>0404 | 3.92039<br>3156 | 3.77233<br>6607 | 4.31060<br>0146 | K00545  | Comt   | catechol-O-methyltransferase                      |
| ENSMUSG00000006344 | 3.97376<br>909  | 3.29558<br>6753 | 3.43422<br>8384 | 5.32086<br>8379 | 6.01102<br>1866 | 5.81322<br>5671 | K18592  | Ggt5   | gamma-glutamyltransferase 5                       |
| ENSMUSG00000015090 | 201.315<br>43   | 158.097<br>0996 | 240.225<br>6269 | 321.989<br>4956 | 503.847<br>7484 | 299.164<br>3445 | K01830  | Ptgds  | prostaglandin D2 synthase (brain)                 |
| ENSMUSG00000018574 | 307.376<br>5826 | 308.042<br>7333 | 314.848<br>9228 | 407.629<br>3108 | 398.803<br>5131 | 403.497<br>4049 | K09479  | Acadvl | acyl-Coenzyme A dehydrogenase, very long<br>chain |
| ENSMUSG00000018924 | 0.13882<br>6741 | 0.47629<br>0804 | 0.06939<br>0939 | 0.02090<br>2508 | 0.01358<br>517  | 0.02375<br>423  | K00460  | Alox15 | arachidonate 15-lipoxygenase                      |
| ENSMUSG00000020777 | 119.991         | 115.297         | 120.934         | 146.945         | 158.962         | 156.027         | K00232  | Acox1  | acyl-Coenzyme A oxidase 1, palmitoyl              |

|                    |         |         |         |         |         |         |        |         |                                                                                                                                                |
|--------------------|---------|---------|---------|---------|---------|---------|--------|---------|------------------------------------------------------------------------------------------------------------------------------------------------|
|                    | 7967    | 0457    | 111     | 1785    | 8243    | 4527    |        |         |                                                                                                                                                |
| ENSMUSG00000021226 | 71.4554 | 69.0354 | 71.5998 | 99.6076 | 104.826 | 99.1386 | K01068 | Acot2   | acyl-CoA thioesterase 2                                                                                                                        |
|                    | 8929    | 5566    | 6506    | 4439    | 6982    | 5231    |        |         |                                                                                                                                                |
| ENSMUSG00000021608 | 6.66137 | 6.60451 | 5.74039 | 5.17243 | 4.00734 | 4.18085 | K13510 | Lpcat1  | lysophosphatidylcholine acyltransferase 1                                                                                                      |
|                    | 1695    | 5962    | 2345    | 2137    | 7911    | 1141    |        |         |                                                                                                                                                |
| ENSMUSG00000022040 | 182.023 | 190.009 | 186.532 | 259.911 | 275.756 | 265.479 | K08726 | Ephx2   | epoxide hydrolase 2, cytoplasmic                                                                                                               |
|                    | 9201    | 1361    | 2965    | 4956    | 4076    | 7147    |        |         |                                                                                                                                                |
| ENSMUSG00000022186 | 262.473 | 263.246 | 289.432 | 153.375 | 177.412 | 173.213 | K01027 | Oxct1   | 3-oxoacid CoA transferase 1                                                                                                                    |
|                    | 9732    | 2315    | 8376    | 2575    | 5371    | 1516    |        |         |                                                                                                                                                |
| ENSMUSG00000022425 | 7.09928 | 8.74523 | 7.41025 | 10.0789 | 9.81271 | 9.18911 | K01122 | Enpp2   | ectonucleotide<br>pyrophosphatase/phosphodiesterase 2                                                                                          |
|                    | 5567    | 6586    | 2784    | 6289    | 5357    | 0914    |        |         |                                                                                                                                                |
| ENSMUSG00000023019 | 1.47286 | 2.25201 | 1.93981 | 2.68402 | 3.08850 | 2.97020 | K00006 | Gpd1    | glycerol-3-phosphate dehydrogenase 1 (soluble)                                                                                                 |
|                    | 3898    | 1718    | 2668    | 8819    | 1273    | 4516    |        |         |                                                                                                                                                |
| ENSMUSG00000024087 | 3.28042 | 2.88578 | 2.52308 | 6.34827 | 5.34169 | 5.78042 | K07410 | Cyp1b1  | cytochrome P450, family 1, subfamily b,<br>polypeptide 1                                                                                       |
|                    | 3378    | 7564    | 8647    | 456     | 7863    | 1416    |        |         |                                                                                                                                                |
| ENSMUSG00000024843 | 1.68942 | 1.67590 | 1.71762 | 2.53286 | 2.14566 | 1.93739 | K14156 | Chka    | choline kinase alpha                                                                                                                           |
|                    | 1769    | 9477    | 2639    | 0902    | 5467    | 6943    |        |         |                                                                                                                                                |
| ENSMUSG00000024900 | 32.8911 | 32.6905 | 35.6328 | 46.9288 | 47.4612 | 47.2230 | K08765 | Cpt1a   | carnitine palmitoyltransferase 1a, liver                                                                                                       |
|                    | 5765    | 3882    | 8305    | 8808    | 8903    | 5855    |        |         |                                                                                                                                                |
| ENSMUSG00000025509 | 322.317 | 289.538 | 285.927 | 463.833 | 474.193 | 426.509 | K16816 | Pnpla2  | patatin-like phospholipase domain containing 2                                                                                                 |
|                    | 5677    | 7776    | 942     | 5701    | 9309    | 1009    |        |         |                                                                                                                                                |
| ENSMUSG00000025745 | 507.020 | 498.376 | 532.215 | 630.924 | 650.948 | 648.936 | K07515 | Hadha   | hydroxyacyl-Coenzyme A<br>dehydrogenase/3-ketoacyl-Coenzyme A<br>thiolase/enoyl-Coenzyme A hydratase<br>(trifunctional protein), alpha subunit |
|                    | 3499    | 921     | 9723    | 722     | 7928    | 8613    |        |         |                                                                                                                                                |
| ENSMUSG00000026003 | 531.218 | 544.502 | 557.552 | 714.970 | 757.393 | 773.867 | K00255 | Acadl   | acyl-Coenzyme A dehydrogenase, long-chain                                                                                                      |
|                    | 8303    | 4808    | 4076    | 9796    | 6353    | 1787    |        |         |                                                                                                                                                |
| ENSMUSG00000026675 | 2.82078 | 3.29796 | 2.98660 | 3.61388 | 4.25758 | 3.66645 | K13373 | Hsd17b7 | hydroxysteroid (17-beta) dehydrogenase 7                                                                                                       |
|                    | 6604    | 1895    | 2871    | 1301    | 9931    | 1502    |        |         |                                                                                                                                                |
| ENSMUSG00000026687 | 18.2965 | 19.9662 | 17.0405 | 23.6584 | 22.5334 | 24.2015 | K00149 | Aldh9a1 | aldehyde dehydrogenase 9, subfamily A1                                                                                                         |
|                    | 2714    | 4489    | 7891    | 5339    | 987     | 8882    |        |         |                                                                                                                                                |

|                    |                 |                 |                 |                 |                 |                 |        |          |                                                                                      |
|--------------------|-----------------|-----------------|-----------------|-----------------|-----------------|-----------------|--------|----------|--------------------------------------------------------------------------------------|
| ENSMUSG00000027875 | 28.8995<br>3743 | 34.8123<br>1421 | 32.2537<br>7747 | 93.6908<br>4259 | 97.1256<br>0815 | 90.6103<br>6974 | K01641 | Hmgcs2   | 3-hydroxy-3-methylglutaryl-Coenzyme A<br>synthase 2                                  |
| ENSMUSG00000027999 | 17.4594<br>0222 | 17.5517<br>7408 | 16.2916<br>6591 | 21.2305<br>309  | 22.4995<br>8879 | 20.4644<br>4385 | K01047 | Pla2g12a | phospholipase A2, group XIA                                                          |
| ENSMUSG00000028497 | 2.79409<br>285  | 3.36319<br>7085 | 3.62900<br>3776 | 2.53922<br>5897 | 1.94402<br>0414 | 2.26205<br>7465 | K10703 | Hacd4    | 3-hydroxyacyl-CoA dehydratase 4                                                      |
| ENSMUSG00000028937 | 67.0644<br>9601 | 61.7724<br>7065 | 63.1553<br>1718 | 79.0275<br>6164 | 81.1317<br>096  | 74.5432<br>1246 | K17360 | Acot7    | acyl-CoA thioesterase 7                                                              |
| ENSMUSG00000029330 | 1.58523<br>5813 | 1.22208<br>9449 | 1.59324<br>3549 | 2.41889<br>794  | 2.70220<br>249  | 2.15100<br>1829 | K00981 | Cds1     | CDP-diacylglycerol synthase 1                                                        |
| ENSMUSG00000029925 | 1.42218<br>5933 | 1.59933<br>9962 | 1.18721<br>4779 | 0.96580<br>169  | 0.77476<br>5642 | 0.89059<br>6176 | K01832 | Tbxas1   | thromboxane A synthase 1, platelet                                                   |
| ENSMUSG00000030483 | 0.10472<br>8691 | 0.19961<br>457  | 0.41877<br>9388 | 0.57817<br>9068 | 1.43478<br>1141 | 0.89599<br>0713 | K07412 | Cyp2b10  | cytochrome P450, family 2, subfamily b,<br>polypeptide 10                            |
| ENSMUSG00000031903 | 9.76358<br>314  | 7.99105<br>1615 | 8.10486<br>1689 | 6.69899<br>8759 | 5.06743<br>4094 | 6.87279<br>4    | K06129 | Pla2g15  | phospholipase A2, group XV                                                           |
| ENSMUSG00000032315 | 0.76881<br>2919 | 1.66899<br>4376 | 1.30160<br>1119 | 8.52304<br>9765 | 10.8360<br>8469 | 9.29332<br>0655 | K07408 | Cyp1a1   | cytochrome P450, family 1, subfamily a,<br>polypeptide 1                             |
| ENSMUSG00000036880 | 795.333<br>9203 | 766.379<br>4719 | 808.361<br>652  | 1063.60<br>2428 | 1116.74<br>6467 | 1042.09<br>8943 | K07508 | Acaa2    | acetyl-Coenzyme A acyltransferase 2<br>(mitochondrial 3-oxoacyl-Coenzyme A thiolase) |
| ENSMUSG00000038732 | 2.56725<br>2917 | 2.37994<br>0582 | 2.23267<br>3173 | 1.22201<br>9593 | 1.10403<br>2396 | 1.38873<br>934  | K13517 | Mboat1   | membrane bound O-acyltransferase domain<br>containing 1                              |
| ENSMUSG00000041193 | 13.9968<br>2865 | 15.1534<br>8074 | 13.7294<br>0201 | 10.3282<br>0841 | 9.63642<br>5811 | 9.01233<br>3089 | K01047 | Pla2g5   | phospholipase A2, group V                                                            |
| ENSMUSG00000041202 | 3.90455<br>4954 | 2.97323<br>7437 | 2.88504<br>2771 | 2.14940<br>379  | 1.48002<br>497  | 1.42597<br>7282 | K01047 | Pla2g2d  | phospholipase A2, group IID                                                          |
| ENSMUSG00000042010 | 79.0911<br>9166 | 75.4317<br>3262 | 74.3710<br>7502 | 90.0134<br>6983 | 100.105<br>3414 | 91.2763<br>5204 | K01946 | Acacb    | acetyl-Coenzyme A carboxylase beta                                                   |
| ENSMUSG00000047250 | 7.67552<br>5704 | 7.15236<br>1786 | 7.48646<br>6679 | 10.6346<br>1185 | 10.0908<br>1979 | 9.05164<br>1744 | K00509 | Ptgs1    | prostaglandin-endoperoxide synthase 1                                                |
| ENSMUSG00000050737 | 0.87115         | 0.87929         | 0.86171         | 1.19430         | 1.12169         | 1.27094         | K15729 | Ptges    | prostaglandin E synthase                                                             |

|                    |         |         |         |         |         |         |        |         |                                         |
|--------------------|---------|---------|---------|---------|---------|---------|--------|---------|-----------------------------------------|
|                    | 969     | 6053    | 1028    | 5777    | 8471    | 5752    |        |         |                                         |
| ENSMUSG00000052396 | 1.86005 | 2.49575 | 2.32900 | 1.06083 | 1.37893 | 1.36630 | K14457 | Mogat2  | monoacylglycerol O-acyltransferase 2    |
|                    | 2156    | 1461    | 9412    | 1615    | 2919    | 1943    |        |         |                                         |
|                    |         |         |         |         |         |         |        |         | hydroxyacyl-Coenzyme A                  |
| ENSMUSG00000059447 | 330.706 | 336.447 | 355.956 | 407.222 | 414.222 | 427.314 | K07509 | Hadhb   | dehydrogenase/3-ketoacyl-Coenzyme A     |
|                    | 6819    | 3266    | 1331    | 4733    | 1469    | 6874    |        |         | thiolase/enoyl-Coenzyme A hydratase     |
|                    |         |         |         |         |         |         |        |         | (trifunctional protein), beta subunit   |
| ENSMUSG00000061740 | 16.8594 | 14.7793 | 14.6009 | 25.0362 | 23.2977 | 23.3577 | K07414 | Cyp2d22 | cytochrome P450, family 2, subfamily d, |
|                    | 7001    | 2283    | 1549    | 9213    | 71      | 4133    |        |         | polypeptide 22                          |
| ENSMUSG00000063275 | 20.4653 | 20.9673 | 20.2448 | 13.5950 | 13.1185 | 13.0248 | K10703 | Hacd1   | 3-hydroxyacyl-CoA dehydratase 1         |
|                    | 4092    | 2188    | 7307    | 8116    | 8172    | 5206    |        |         |                                         |
| ENSMUSG00000072949 | 32.8546 | 35.0159 | 39.6635 | 75.2903 | 80.1070 | 69.3892 | K01068 | Acot1   | acyl-CoA thioesterase 1                 |
|                    | 1548    | 0604    | 74      | 2821    | 841     | 2867    |        |         |                                         |
| ENSMUSG00000074207 | 6.32106 | 5.26486 | 5.40029 | 9.83795 | 8.66423 | 7.92006 | K13951 | Adh1    | alcohol dehydrogenase 1 (class I)       |
|                    | 4398    | 0001    | 8678    | 7108    | 3558    | 9471    |        |         |                                         |
| ENSMUSG00000083816 | 0.44295 | 0.36183 | 0.47444 | 0.11909 | 0.12384 | 0.05413 |        | Gm13033 | prostaglandin-endoperoxide synthase 2   |
|                    | 8437    | 6817    | 4955    | 6832    | 7397    | 807     |        |         | pseudogene                              |
| ENSMUSG00000107653 | 2.01889 | 1.87254 | 1.62336 | 2.84150 | 2.96343 | 2.68471 |        | Gm31520 | sterol-C5-desaturase pseudogene         |
|                    | 0619    | 0227    | 5506    | 6626    | 9039    | 8979    |        |         |                                         |



**Table SVII. The DEGs in the metabolic related pathways of SPM / DbCM.**

**SPM\_vs\_DbCM.DEG.kegg.Amino\_acid\_metabolism**

| Gene_ID            | DbCM-1          | DbCM-2          | DbCM-3          | SPM-1           | SPM-2           | SPM-3           | KEGG_ID | symbol | ncbi_description                                              |
|--------------------|-----------------|-----------------|-----------------|-----------------|-----------------|-----------------|---------|--------|---------------------------------------------------------------|
| ENSMUSG00000001670 | 0.212017<br>434 | 0.4685081<br>84 | 0.33732<br>0069 | 2.49275<br>388  | 1.679611<br>934 | 1.284326<br>567 | K00815  | Tat    | tyrosine aminotransferase                                     |
| ENSMUSG00000003477 | 83.92356<br>779 | 82.470004<br>52 | 74.7046<br>0531 | 59.4122<br>3561 | 56.89975<br>689 | 52.36613<br>26  | K00562  | Inmt   | indolethylamine N-methyltransferase                           |
| ENSMUSG00000003809 | 30.03356<br>106 | 30.008261<br>39 | 29.2985<br>5175 | 19.9244<br>392  | 22.27838<br>993 | 23.69464<br>968 | K00252  | Gcdh   | glutaryl-Coenzyme A dehydrogenase                             |
| ENSMUSG00000006442 | 11.29016<br>607 | 10.003893<br>81 | 10.1146<br>9496 | 7.39689<br>9276 | 6.361829<br>449 | 7.076654<br>58  | K00797  | Srm    | spermidine synthase                                           |
| ENSMUSG00000010651 | 0.268316<br>913 | 0.0968818<br>08 | 0.15246<br>1652 | 1.23921<br>3726 | 0.762470<br>511 | 0.395054<br>936 | K07513  | Acaa1b | acetyl-Coenzyme A acyltransferase 1B                          |
| ENSMUSG00000011752 | 27.99591<br>218 | 28.115269<br>88 | 27.6900<br>1148 | 18.0774<br>4718 | 21.03153<br>498 | 23.21857<br>789 | K01834  | Pgam1  | phosphoglycerate mutase 1                                     |
| ENSMUSG00000017713 | 3.468174<br>246 | 3.7770920<br>06 | 3.43002<br>7689 | 2.19299<br>7025 | 2.268634<br>678 | 2.472339<br>598 | K01620  | Tha1   | threonine aldolase 1                                          |
| ENSMUSG00000019987 | 0.068184<br>348 | 0.1329451<br>91 | 0.07748<br>6717 | 3.03660<br>6997 | 1.361031<br>96  | 0.107561<br>625 | K01476  | Arg1   | arginase, liver                                               |
| ENSMUSG00000020182 | 1.285053<br>64  | 1.2163035<br>66 | 1.71558<br>3936 | 1.09644<br>8865 | 0.638162<br>881 | 0.519589<br>81  | K01593  | Ddc    | dopa decarboxylase                                            |
| ENSMUSG00000021033 | 15.54590<br>768 | 14.567953<br>01 | 14.1881<br>4333 | 11.8124<br>0455 | 10.82534<br>719 | 10.70988<br>445 | K01800  | Gstz1  | glutathione transferase zeta 1 (maleylacetoacetate isomerase) |
| ENSMUSG00000021913 | 75.04430<br>554 | 90.479629<br>78 | 78.4196<br>9994 | 54.4279<br>8721 | 61.25089<br>362 | 64.76783<br>255 | K00164  | Ogdhl  | oxoglutarate dehydrogenase-like                               |
| ENSMUSG00000022546 | 14.84226<br>008 | 15.861466<br>04 | 13.6121<br>1416 | 8.48814<br>6822 | 9.185539<br>896 | 10.98028<br>505 | K00814  | Gpt    | glutamic pyruvic transaminase, soluble                        |
| ENSMUSG00000022821 | 0               | 0               | 0               | 0.38649         | 0.258367        | 0.018668        | K00451  | Hgd    | homogentisate 1, 2-dioxygenase                                |

|                    |          |           |         |         |          |          |        |         |                                                                    |
|--------------------|----------|-----------|---------|---------|----------|----------|--------|---------|--------------------------------------------------------------------|
|                    |          |           |         | 2392    | 168      | 451      |        |         |                                                                    |
| ENSMUSG00000022853 | 15.63326 | 14.952610 | 12.8806 | 8.10451 | 9.124829 | 10.40293 | K07514 | Ehhadh  | enoyl-Coenzyme A, hydratase/3-hydroxyacyl Coenzyme A dehydrogenase |
|                    | 306      | 13        | 6551    | 834     | 551      | 03       |        |         |                                                                    |
| ENSMUSG00000023262 | 8.000565 | 8.4377527 | 7.89295 | 4.98076 | 6.015402 | 6.405309 | K14677 | Acy1    | aminoacylase 1                                                     |
|                    | 056      | 09        | 7268    | 5764    | 502      | 053      |        |         |                                                                    |
| ENSMUSG00000024087 | 6.348274 | 5.3416978 | 5.78042 | 9.07859 | 9.016305 | 8.724137 | K07410 | Cyp1b1  | cytochrome P450, family 1, subfamily b, polypeptide 1              |
|                    | 56       | 63        | 1416    | 0363    | 909      | 169      |        |         |                                                                    |
| ENSMUSG00000024885 | 3.276376 | 2.6181339 | 3.12824 | 3.81131 | 4.255016 | 4.202601 | K00129 | Aldh3b1 | aldehyde dehydrogenase 3 family, member B1                         |
|                    | 086      | 68        | 2064    | 1572    | 899      | 932      |        |         |                                                                    |
| ENSMUSG00000025991 | 0.077049 | 0.0235655 | 0.04635 | 2.32529 | 1.113912 | 0.011439 | K01948 | Cps1    | carbamoyl-phosphate synthetase 1                                   |
|                    | 54       | 62        | 6027    | 2057    | 321      | 677      |        |         |                                                                    |
| ENSMUSG00000027332 | 126.4005 | 133.95166 | 118.335 | 71.5326 | 85.71991 | 95.49450 | K00253 | Ivd     | isovaleryl coenzyme A dehydrogenase                                |
|                    | 714      | 32        | 6733    | 6195    | 189      | 229      |        |         |                                                                    |
| ENSMUSG00000028011 | 0.007338 | 0         | 0.00833 | 0.98477 | 0.622525 | 0.018521 | K00453 | Tdo2    | tryptophan 2,3-dioxygenase                                         |
|                    | 114      |           | 9251    | 1679    | 347      | 541      |        |         |                                                                    |
| ENSMUSG00000028124 | 2.121739 | 2.7696756 | 2.66717 | 1.16627 | 1.118375 | 1.205229 | K11205 | Gclm    | glutamate-cysteine ligase, modifier subunit                        |
|                    | 153      | 28        | 4167    | 2965    | 93       | 07       |        |         |                                                                    |
| ENSMUSG00000029455 | 135.7947 | 143.49974 | 127.758 | 101.044 | 102.2878 | 103.6116 | K00128 | Aldh2   | aldehyde dehydrogenase 2, mitochondrial                            |
|                    | 132      |           | 6987    | 5231    | 09       | 91       |        |         |                                                                    |
| ENSMUSG00000029482 | 1.834451 | 2.2430755 | 2.34973 | 1.50471 | 1.570988 | 1.500888 | K01907 | Aacs    | acetoacetyl-CoA synthetase                                         |
|                    | 559      | 67        | 2648    | 5799    | 158      | 154      |        |         |                                                                    |
| ENSMUSG00000029545 | 172.6801 | 185.21388 | 160.116 | 112.906 | 127.9071 | 136.7384 | K00248 | Acads   | acyl-Coenzyme A dehydrogenase, short chain                         |
|                    | 043      | 9         | 7145    | 3718    | 286      | 42       |        |         |                                                                    |
| ENSMUSG00000030630 | 15.72574 | 18.314549 | 14.4233 | 8.73432 | 8.897867 | 9.040971 | K01555 | Fah     | fumarylacetoacetate hydrolase                                      |
|                    | 109      | 13        | 212     | 9049    | 191      | 961      |        |         |                                                                    |
| ENSMUSG00000030826 | 58.66584 | 64.824292 | 57.4026 | 38.4496 | 42.57943 | 45.60694 | K00826 | Bcat2   | branched chain aminotransferase 2, mitochondrial                   |
|                    | 049      | 51        | 7908    | 0243    | 072      | 58       |        |         |                                                                    |
| ENSMUSG00000031173 | 0        | 0.0109198 | 0.00954 | 0.32923 | 0.272493 | 0.021203 | K00611 | Otc     | ornithine transcarbamylase                                         |
|                    |          | 11        | 687     | 426     | 062      | 673      |        |         |                                                                    |
| ENSMUSG00000032263 | 28.73970 | 30.333661 | 29.9486 | 20.8513 | 23.07374 | 22.52340 | K00167 | Bckdhb  | branched chain ketoacid dehydrogenase E1, beta polypeptide         |

|                    |          |           |         |         |          |          |        |          |                                                             |
|--------------------|----------|-----------|---------|---------|----------|----------|--------|----------|-------------------------------------------------------------|
|                    | 25       | 16        | 1596    | 6804    | 494      | 434      |        |          |                                                             |
| ENSMUSG00000032315 | 8.523049 | 10.836084 | 9.29332 | 35.5656 | 22.02314 | 11.06247 | K07408 | Cyp1a1   | cytochrome P450, family 1, subfamily a, polypeptide 1       |
|                    | 765      | 69        | 0655    | 8992    | 951      | 986      |        |          |                                                             |
| ENSMUSG00000032374 | 4.543282 | 3.7613786 | 4.56166 | 5.80377 | 6.422642 | 6.566392 | K13645 | Plod2    | procollagen lysine, 2-oxoglutarate 5-dioxygenase 2          |
|                    | 417      | 53        | 8178    | 4188    | 426      | 034      |        |          |                                                             |
| ENSMUSG00000032527 | 78.97135 | 83.227319 | 80.1751 | 55.0323 | 60.36960 | 64.94435 | K01966 | Pccb     | propionyl Coenzyme A carboxylase, beta polypeptide          |
|                    | 381      | 03        | 8       | 0644    | 471      | 558      |        |          |                                                             |
| ENSMUSG00000034807 | 27.23394 | 27.818183 | 28.8974 | 20.0082 | 21.00860 | 22.19304 | K11703 | Colgalt1 | collagen beta(1-O)galactosyltransferase 1                   |
|                    | 356      | 65        | 6528    | 2591    | 334      | 56       |        |          |                                                             |
| ENSMUSG00000037798 | 0.036299 | 0.0094367 | 0.03300 | 2.63827 | 1.123081 | 0.018323 | K00789 | Mat1a    | methionine adenosyltransferase I, alpha                     |
|                    | 121      | 57        | 1119    | 5608    | 934      | 935      |        |          |                                                             |
| ENSMUSG00000044986 | 7.955686 | 7.0474836 | 6.76994 | 5.26920 | 5.642598 | 5.116616 | K01011 | Tst      | thiosulfate sulfurtransferase, mitochondrial                |
|                    | 487      | 69        | 2032    | 319     | 205      | 235      |        |          |                                                             |
| ENSMUSG00000057880 | 3.024941 | 3.3460836 | 3.04264 | 1.78009 | 2.127428 | 2.193180 | K13524 | Abat     | 4-aminobutyrate aminotransferase                            |
|                    | 367      | 41        | 4793    | 6226    | 953      | 612      |        |          |                                                             |
| ENSMUSG00000059422 | 3.458964 | 5.3681556 | 4.31204 | 3.80913 | 9.389020 | 8.307196 |        | Gm8116   | predicted gene 8116                                         |
|                    | 701      | 18        | 5452    | 3976    | 47       | 581      |        |          |                                                             |
| ENSMUSG00000060376 | 74.62966 | 78.464744 | 64.5464 | 46.0237 | 52.59821 | 55.08111 | K00166 | Bckdha   | branched chain ketoacid dehydrogenase E1, alpha polypeptide |
|                    | 241      | 32        | 3491    | 1538    | 428      | 32       |        |          |                                                             |
| ENSMUSG00000071711 | 38.73505 | 31.531861 | 29.1016 | 23.8453 | 23.40076 | 22.49353 | K01011 | Mpst     | mercaptopyruvate sulfurtransferase                          |
|                    | 915      | 61        | 2161    | 1588    | 771      | 498      |        |          |                                                             |
| ENSMUSG00000080845 | 0.522965 | 0.2185015 | 0.25470 | 0.08872 | 0.023301 | 0        |        | Gm9115   | ornithine decarboxylase, structural 1 pseudogene            |
|                    | 853      | 37        | 5965    | 5391    | 236      |          |        |          |                                                             |

#### SPM\_vs\_DbCM.DEG.kegg.Lipid\_metabolism

| Gene_ID            | DbCM-1   | DbCM-2  | DbCM-3   | SPM-1   | SPM-2   | SPM-3   | KEGG_ID | symbol  | ncbi_description                                       |
|--------------------|----------|---------|----------|---------|---------|---------|---------|---------|--------------------------------------------------------|
| ENSMUSG00000003053 | 0        | 0       | 0        | 1.50455 | 0.86817 | 0.01125 | K07413  | Cyp2c29 | cytochrome P450, family 2, subfamily c, polypeptide 29 |
|                    |          |         |          | 8781    | 3325    | 9286    |         |         |                                                        |
| ENSMUSG00000003809 | 30.03356 | 30.0082 | 29.29855 | 19.9244 | 22.2783 | 23.6946 | K00252  | Gcdh    | glutaryl-Coenzyme A dehydrogenase                      |

|                     |          |         |          |         |         |         |        |          |                                                                                   |
|---------------------|----------|---------|----------|---------|---------|---------|--------|----------|-----------------------------------------------------------------------------------|
|                     | 106      | 6139    | 175      | 392     | 8993    | 4968    |        |          |                                                                                   |
| ENSMUSG00000004270  | 35.32004 | 34.5195 | 33.92923 | 25.5407 | 25.8375 | 26.6990 | K13515 | Lpcat3   | lysophosphatidylcholine acyltransferase 3                                         |
|                     | 515      | 392     | 888      | 6111    | 2559    | 1644    |        |          |                                                                                   |
| ENSMUSG000000010651 | 0.268316 | 0.09688 | 0.152461 | 1.23921 | 0.76247 | 0.39505 | K07513 | Acaa1b   | acetyl-Coenzyme A acyltransferase 1B                                              |
|                     | 913      | 1808    | 652      | 3726    | 0511    | 4936    |        |          |                                                                                   |
| ENSMUSG000000018924 | 0.020902 | 0.01358 | 0.023754 | 0.38477 | 0.16950 | 0.14508 | K00460 | Alox15   | arachidonate 15-lipoxygenase                                                      |
|                     | 508      | 517     | 23       | 1342    | 2223    | 5407    |        |          |                                                                                   |
| ENSMUSG000000020333 | 1.586844 | 2.06831 | 1.749138 | 0.96286 | 1.18457 | 1.61412 | K01897 | Acsl6    | acyl-CoA synthetase long-chain family member 6                                    |
|                     | 798      | 2309    | 864      | 9888    | 1102    | 8244    |        |          |                                                                                   |
| ENSMUSG000000021273 | 32.38024 | 31.3991 | 28.24058 | 23.3349 | 22.9332 | 23.1815 | K00801 | Fdft1    | farnesyl diphosphate farnesyl transferase 1                                       |
|                     | 514      | 9997    | 704      | 6987    | 551     | 7212    |        |          |                                                                                   |
| ENSMUSG000000021364 | 0.039339 | 0       | 0        | 0.31146 | 0.16359 | 0.00827 | K10205 | Elovl2   | elongation of very long chain fatty acids<br>(FEN1/Elo2, SUR4/Elo3, yeast)-like 2 |
|                     | 172      |         |          | 3093    | 4092    | 4402    |        |          |                                                                                   |
| ENSMUSG000000022853 | 15.63326 | 14.9526 | 12.88066 | 8.10451 | 9.12482 | 10.4029 | K07514 | Ehhadh   | enoyl-Coenzyme A, hydratase/3-hydroxyacyl<br>Coenzyme A dehydrogenase             |
|                     | 306      | 1013    | 551      | 834     | 9551    | 303     |        |          |                                                                                   |
| ENSMUSG000000022947 | 5.960725 | 4.72718 | 5.086572 | 3.78228 | 3.59739 | 3.47609 | K00084 | Cbr3     | carbonyl reductase 3                                                              |
|                     | 199      | 6331    | 462      | 0017    | 2139    | 7545    |        |          |                                                                                   |
| ENSMUSG000000024087 | 6.348274 | 5.34169 | 5.780421 | 9.07859 | 9.01630 | 8.72413 | K07410 | Cyp1b1   | cytochrome P450, family 1, subfamily b,<br>polypeptide 1                          |
|                     | 56       | 7863    | 416      | 0363    | 5909    | 7169    |        |          |                                                                                   |
| ENSMUSG000000024978 | 67.58124 | 69.4075 | 66.51984 | 39.6774 | 51.8938 | 61.3086 | K00629 | Gpam     | glycerol-3-phosphate acyltransferase,<br>mitochondrial                            |
|                     | 882      | 3771    | 384      | 0692    | 22      | 556     |        |          |                                                                                   |
| ENSMUSG000000025059 | 3.608326 | 2.81268 | 3.724830 | 5.36692 | 4.94310 | 4.72944 | K00864 | Gk       | glycerol kinase                                                                   |
|                     | 67       | 4246    | 209      | 5327    | 4809    | 9968    |        |          |                                                                                   |
| ENSMUSG000000025495 | 10.60160 | 10.8998 | 9.529428 | 6.79030 | 6.86445 | 6.68089 | K08730 | Ptdss2   | phosphatidylserine synthase 2                                                     |
|                     | 302      | 6099    | 231      | 7954    | 1443    | 4741    |        |          |                                                                                   |
| ENSMUSG000000025509 | 463.8335 | 474.193 | 426.5091 | 315.942 | 324.092 | 335.409 | K16816 | Pnpla2   | patatin-like phospholipase domain containing 2                                    |
|                     | 701      | 9309    | 009      | 4659    | 0493    | 2728    |        |          |                                                                                   |
| ENSMUSG000000026675 | 3.613881 | 4.25758 | 3.666451 | 5.54312 | 5.13512 | 4.77432 | K13373 | Hsd17b7  | hydroxysteroid (17-beta) dehydrogenase 7                                          |
|                     | 301      | 9931    | 502      | 4598    | 349     | 2844    |        |          |                                                                                   |
| ENSMUSG000000027195 | 10.49706 | 8.25909 | 8.935599 | 14.1013 | 13.8884 | 13.1137 | K10251 | Hsd17b12 | hydroxysteroid (17-beta) dehydrogenase 12                                         |
|                     | 455      | 7692    | 494      | 1958    | 6753    | 5275    |        |          |                                                                                   |

|                    |                 |                 |                 |                 |                 |                 |        |          |                                                          |
|--------------------|-----------------|-----------------|-----------------|-----------------|-----------------|-----------------|--------|----------|----------------------------------------------------------|
| ENSMUSG00000027999 | 21.23053<br>09  | 22.4995<br>8879 | 20.46444<br>385 | 15.1201<br>1741 | 14.4452<br>7085 | 15.3558<br>7438 | K01047 | Pla2g12a | phospholipase A2, group XIA                              |
| ENSMUSG00000028597 | 10.60601<br>179 | 7.84526<br>1794 | 8.323885<br>793 | 6.68062<br>9624 | 6.43309<br>3362 | 6.82801<br>8651 | K00432 | Gpx7     | glutathione peroxidase 7                                 |
| ENSMUSG00000029233 | 4.672501<br>342 | 4.03923<br>8217 | 4.691332<br>034 | 5.17197<br>0922 | 6.18297<br>2391 | 6.09711<br>6196 | K12345 | Srd5a3   | steroid 5 alpha-reductase 3                              |
| ENSMUSG00000029455 | 135.7947<br>132 | 143.499<br>74   | 127.7586<br>987 | 101.044<br>5231 | 102.287<br>809  | 103.611<br>691  | K00128 | Aldh2    | aldehyde dehydrogenase 2, mitochondrial                  |
| ENSMUSG00000029545 | 172.6801<br>043 | 185.213<br>889  | 160.1167<br>145 | 112.906<br>3718 | 127.907<br>1286 | 136.738<br>442  | K00248 | Acads    | acyl-Coenzyme A dehydrogenase, short chain               |
| ENSMUSG00000030747 | 196.1518<br>614 | 216.890<br>1764 | 193.6430<br>814 | 155.424<br>214  | 153.578<br>8358 | 155.005<br>6697 | K11160 | Dgat2    | diacylglycerol O-acyltransferase 2                       |
| ENSMUSG00000030760 | 0.588353<br>055 | 0.43289<br>2521 | 0.514712<br>69  | 0.87275<br>5841 | 0.70077<br>1307 | 0.63323<br>2551 | K04711 | Acer3    | alkaline ceramidase 3                                    |
| ENSMUSG00000031278 | 1.869206<br>737 | 1.85327<br>1914 | 2.026681<br>215 | 2.44640<br>1019 | 2.52232<br>3457 | 2.58763<br>1207 | K01897 | Acsl4    | acyl-CoA synthetase long-chain family member 4           |
| ENSMUSG00000032315 | 8.523049<br>765 | 10.8360<br>8469 | 9.293320<br>655 | 35.5656<br>8992 | 22.0231<br>4951 | 11.0624<br>7986 | K07408 | Cyp1a1   | cytochrome P450, family 1, subfamily a,<br>polypeptide 1 |
| ENSMUSG00000036833 | 16.01929<br>28  | 17.3559<br>1409 | 16.79775<br>541 | 10.1438<br>7251 | 10.4995<br>0853 | 11.5916<br>1996 | K14676 | Pnpla7   | patatin-like phospholipase domain containing 7           |
| ENSMUSG00000038173 | 2.188429<br>454 | 1.17210<br>2229 | 1.134116<br>32  | 1.90713<br>1758 | 2.48373<br>3565 | 2.86410<br>854  | K08743 | Enpp6    | ectonucleotide<br>pyrophosphatase/phosphodiesterase 6    |
| ENSMUSG00000040774 | 4.026183<br>956 | 4.23330<br>1192 | 5.673588<br>953 | 6.84289<br>0632 | 6.92048<br>3557 | 6.57153<br>3688 | K13644 | Cept1    | choline/ethanolaminephosphotransferase 1                 |
| ENSMUSG00000041193 | 10.32820<br>841 | 9.63642<br>5811 | 9.012333<br>089 | 5.02912<br>8835 | 6.83364<br>4699 | 7.55128<br>6606 | K01047 | Pla2g5   | phospholipase A2, group V                                |
| ENSMUSG00000041202 | 2.149403<br>79  | 1.48002<br>497  | 1.425977<br>282 | 0.46913<br>4995 | 0.76822<br>0342 | 0.83576<br>4252 | K01047 | Pla2g2d  | phospholipase A2, group IID                              |
| ENSMUSG00000046598 | 7.229848<br>155 | 8.55944<br>3357 | 4.479103<br>478 | 1.00235<br>5607 | 2.32446<br>4065 | 3.97924<br>9472 | K00019 | Bdh1     | 3-hydroxybutyrate dehydrogenase, type 1                  |
| ENSMUSG00000050195 | 20.69911        | 25.8764         | 20.63246        | 33.0659         | 30.4979         | 28.5828         | K00507 | Scd4     | stearoyl-coenzyme A desaturase 4                         |

|                    |          |         |          |         |         |         |        |         |                                                           |
|--------------------|----------|---------|----------|---------|---------|---------|--------|---------|-----------------------------------------------------------|
|                    | 59       | 4507    | 725      | 6201    | 7667    | 7842    |        |         |                                                           |
| ENSMUSG00000050737 | 1.194305 | 1.12169 | 1.270945 | 0.80346 | 0.80096 | 0.80153 | K15729 | Ptges   | prostaglandin E synthase                                  |
|                    | 777      | 8471    | 752      | 7172    | 9594    | 0238    |        |         |                                                           |
| ENSMUSG00000052160 | 0.150000 | 0.11998 | 0.104901 | 0.63034 | 0.35987 | 0.24754 | K16860 | Pld4    | phospholipase D family, member 4                          |
|                    | 877      | 7808    | 815      | 877     | 7013    | 9482    |        |         |                                                           |
| ENSMUSG00000057342 | 8.408914 | 9.67595 | 8.241666 | 5.78963 | 6.25899 | 6.67176 | K04718 | Sphk2   | sphingosine kinase 2                                      |
|                    | 416      | 3117    | 697      | 1873    | 5616    | 1435    |        |         |                                                           |
| ENSMUSG00000068086 | 0        | 0       | 0.050137 | 2.60231 | 1.17420 | 0.01855 | K07414 | Cyp2d9  | cytochrome P450, family 2, subfamily d,<br>polypeptide 9  |
|                    |          |         | 798      | 7802    | 8063    | 9407    |        |         |                                                           |
| ENSMUSG00000071072 | 15.20695 | 14.4815 | 16.59494 | 20.2127 | 20.9976 | 19.6838 | K15730 | Ptges3  | prostaglandin E synthase 3                                |
|                    | 048      | 5351    | 266      | 0886    | 2892    | 097     |        |         |                                                           |
| ENSMUSG00000072949 | 75.29032 | 80.1070 | 69.38922 | 57.0660 | 54.2974 | 50.2566 | K01068 | Acot1   | acyl-CoA thioesterase 1                                   |
|                    | 821      | 841     | 867      | 4613    | 6144    | 8547    |        |         |                                                           |
| ENSMUSG00000083816 | 0.119096 | 0.12384 | 0.054138 | 0.39603 | 0.56460 | 0.57114 |        | Gm13033 | prostaglandin-endoperoxide synthase 2<br>pseudogene       |
|                    | 832      | 7397    | 07       | 2542    | 856     | 5107    |        |         |                                                           |
| ENSMUSG00000094806 | 0.015277 | 0.01985 | 0.017361 | 1.27004 | 0.60990 | 0.01928 |        | Cyp2d10 | cytochrome P450, family 2, subfamily d,<br>polypeptide 10 |
|                    | 349      | 8419    | 632      | 3679    | 4188    | 016     |        |         |                                                           |

**Table SVIII. KEGG analysis of the DEPs in DbCM compared to CK.**

| class_A            | class_B                  | Term                                    | ID       | Input number | Background number | P-Value  | Input                                                                                                                                                                                                                                                                                                                                                                                                |
|--------------------|--------------------------|-----------------------------------------|----------|--------------|-------------------|----------|------------------------------------------------------------------------------------------------------------------------------------------------------------------------------------------------------------------------------------------------------------------------------------------------------------------------------------------------------------------------------------------------------|
| Human Diseases     | Immune diseases          | Systemic lupus erythematosus            | mmu05322 | 10           | 149               | 3.39E-10 | ENSMUSG00000100210 ENSMUSG00000074403 ENSMUSG00000099583 ENSMUSG00000081058 ENSMUSG00000069267 ENSMUSG00000093769 ENSMUSG00000069273 ENSMUSG00000035031 ENSMUSG00000073421 ENSMUSG00000069310                                                                                                                                                                                                        |
| Human Diseases     | Substance dependence     | Alcoholism                              | mmu05034 | 10           | 204               | 6.04E-09 | ENSMUSG00000100210 ENSMUSG00000099583 ENSMUSG000040147 ENSMUSG00000081058 ENSMUSG00000069267 ENSMUSG00000093769 ENSMUSG00000069273 ENSMUSG00000074403 ENSMUSG00000004936 ENSMUSG00000069310                                                                                                                                                                                                          |
| Human Diseases     | Cancers: Overview        | Transcriptional misregulation in cancer | mmu05202 | 9            | 180               | 3.03E-08 | ENSMUSG00000100210 ENSMUSG00000048416 ENSMUSG00000099583 ENSMUSG00000081058 ENSMUSG00000069267 ENSMUSG00000093769 ENSMUSG00000069273 ENSMUSG00000074403 ENSMUSG00000069310                                                                                                                                                                                                                           |
| Cellular Processes | Transport and catabolism | Peroxisome                              | mmu04146 | 7            | 83                | 3.79E-08 | ENSMUSG00000028603 ENSMUSG00000027187 ENSMUSG00000022040 ENSMUSG00000003623 ENSMUSG00000020777 ENSMUSG000000031767 ENSMUSG000000053898                                                                                                                                                                                                                                                               |
| Metabolism         | Global and overview maps | Metabolic pathways                      | mmu01100 | 20           | 1298              | 5.52E-08 | ENSMUSG000000059447 ENSMUSG00000028603 ENSMUSG00000021456 ENSMUSG00000040147 ENSMUSG00000022040 ENSMUSG000000019326 ENSMUSG00000000326 ENSMUSG00000024525 ENSMUSG00000027875 ENSMUSG00000061838 ENSMUSG00000071708 ENSMUSG00000021048 ENSMUSG00000020777 ENSMUSG000000039682 ENSMUSG000000072949 ENSMUSG000000021226 ENSMUSG000000032315 ENSMUSG000000017715 ENSMUSG000000003526 ENSMUSG000000030682 |
| Organismal Systems | Endocrine system         | PPAR signaling pathway                  | mmu03320 | 6            | 85                | 9.83E-07 | ENSMUSG00000028603 ENSMUSG00000027875 ENSMUSG000000011305 ENSMUSG00000020777 ENSMUSG00000024900 EN                                                                                                                                                                                                                                                                                                   |

|                           |                                 |                                         |          |   |     |             |                                                                                               |
|---------------------------|---------------------------------|-----------------------------------------|----------|---|-----|-------------|-----------------------------------------------------------------------------------------------|
|                           |                                 |                                         |          |   |     |             | SMUSG00000062515                                                                              |
| Metabolism                | Amino acid metabolism           | Tryptophan metabolism                   | mmu00380 | 4 | 47  | 3.46E-05    | ENSMUSG00000032315 ENSMUSG00000040147 ENSMUSG0000003477 ENSMUSG00000027187                    |
| Metabolism                | Amino acid metabolism           | Arginine and proline metabolism         | mmu00330 | 4 | 51  | 4.66E-05    | ENSMUSG00000071708 ENSMUSG00000040147 ENSMUSG0000039682 ENSMUSG00000003526                    |
| Metabolism                | Metabolism of other amino acids | Glutathione metabolism                  | mmu00480 | 4 | 57  | 7.02E-05    | ENSMUSG00000071708 ENSMUSG00000004035 ENSMUSG0000058135 ENSMUSG00000039682                    |
| Organismal Systems        | Circulatory system              | Vascular smooth muscle contraction      | mmu04270 | 5 | 128 | 0.000122047 | ENSMUSG00000004936 ENSMUSG00000035783 ENSMUSG0000018830 ENSMUSG00000019254 ENSMUSG00000090841 |
| Metabolism                | Lipid metabolism                | Fatty acid elongation                   | mmu00062 | 3 | 27  | 0.000170076 | ENSMUSG00000021226 ENSMUSG00000072949 ENSMUSG0000059447                                       |
| Metabolism                | Lipid metabolism                | Biosynthesis of unsaturated fatty acids | mmu01040 | 3 | 28  | 0.000187806 | ENSMUSG00000021226 ENSMUSG00000072949 ENSMUSG0000020777                                       |
| Organismal Systems        | Endocrine system                | Oxytocin signaling pathway              | mmu04921 | 5 | 158 | 0.000314151 | ENSMUSG00000004936 ENSMUSG00000020122 ENSMUSG0000019254 ENSMUSG00000090841 ENSMUSG00000028944 |
| Organismal Systems        | Immune system                   | Complement and coagulation cascades     | mmu04610 | 4 | 87  | 0.00033087  | ENSMUSG00000092511 ENSMUSG00000059481 ENSMUSG0000035031 ENSMUSG00000072849                    |
| Human Diseases            | Cancers: Overview               | Chemical carcinogenesis                 | mmu05204 | 4 | 93  | 0.000421887 | ENSMUSG00000058135 ENSMUSG00000004035 ENSMUSG0000030711 ENSMUSG00000032315                    |
| Metabolism                | Amino acid metabolism           | Tyrosine metabolism                     | mmu00350 | 3 | 40  | 0.000499671 | ENSMUSG00000019326 ENSMUSG00000040147 ENSMUSG00000000326                                      |
| Environmental Information | Signal transduction             | HIF-1 signaling pathway                 | mmu04066 | 4 | 110 | 0.000775272 | ENSMUSG00000004936 ENSMUSG00000020122 ENSMUSG0000041616 ENSMUSG00000022797                    |



|                                      |                                           |                                              |          |   |     |             |                                                                             |
|--------------------------------------|-------------------------------------------|----------------------------------------------|----------|---|-----|-------------|-----------------------------------------------------------------------------|
| Processing                           |                                           |                                              |          |   |     |             |                                                                             |
| Metabolism                           | Lipid metabolism                          | Fatty acid degradation                       | mmu00071 | 3 | 49  | 0.000873997 | ENSMUSG00000024900 ENSMUSG00000020777 ENSMUSG00000059447                    |
| Metabolism                           | Global and overview maps                  | Fatty acid metabolism                        | mmu01212 | 3 | 52  | 0.00102943  | ENSMUSG00000024900 ENSMUSG00000020777 ENSMUSG00000059447                    |
| Human Diseases                       | Infectious diseases: Bacterial            | Staphylococcus aureus infection              | mmu05150 | 3 | 53  | 0.001084864 | ENSMUSG000000092511 ENSMUSG000000073421 ENSMUSG00000059481                  |
| Environmental Information Processing | Signal transduction                       | FoxO signaling pathway                       | mmu04068 | 4 | 135 | 0.001615069 | ENSMUSG00000004936 ENSMUSG00000020122 ENSMUSG00000028944 ENSMUSG00000027187 |
| Metabolism                           | Xenobiotics biodegradation and metabolism | Metabolism of xenobiotics by cytochrome P450 | mmu00980 | 3 | 65  | 0.001900942 | ENSMUSG000000058135 ENSMUSG00000004035 ENSMUSG00000032315                   |
| Human Diseases                       | Cancers: Overview                         | Central carbon metabolism in cancer          | mmu05230 | 3 | 66  | 0.001982178 | ENSMUSG00000004936 ENSMUSG00000020122 ENSMUSG00000025486                    |
| Metabolism                           | Xenobiotics biodegradation and metabolism | Drug metabolism - cytochrome P450            | mmu00982 | 3 | 67  | 0.002065546 | ENSMUSG00000004035 ENSMUSG00000040147 ENSMUSG00000058135                    |
| Metabolism                           | Energy metabolism                         | Nitrogen metabolism                          | mmu00910 | 2 | 17  | 0.002092773 | ENSMUSG00000027559 ENSMUSG00000000805                                       |
| Metabolism                           | Amino acid metabolism                     | Phenylalanine metabolism                     | mmu00360 | 2 | 24  | 0.00391278  | ENSMUSG00000019326 ENSMUSG00000040147                                       |
| Cellular Processes                   | Cellular community - eukaryotes           | Gap junction                                 | mmu04540 | 3 | 86  | 0.004078646 | ENSMUSG00000004936 ENSMUSG00000020122 ENSMUSG00000001525                    |
| Metabolism                           | Lipid metabolism                          | Steroid hormone                              | mmu00140 | 3 | 87  | 0.00420835  | ENSMUSG000000061740 ENSMUSG00000032315 ENSMUSG00000000326                   |

|                                      |                                  |                                          |          |   |     |             |                                                                            |
|--------------------------------------|----------------------------------|------------------------------------------|----------|---|-----|-------------|----------------------------------------------------------------------------|
| Organismal Systems                   | Development                      | biosynthesis                             |          |   |     |             |                                                                            |
|                                      |                                  | Dorso-ventral axis formation             | mmu04320 | 2 | 26  | 0.004529612 | ENSMUSG00000004936 ENSMUSG00000020122                                      |
| Human Diseases                       | Cancers: Specific types          | Thyroid cancer                           | mmu05216 | 2 | 29  | 0.005533184 | ENSMUSG00000004936 ENSMUSG00000006005                                      |
|                                      |                                  | Metabolism of other amino acids          | mmu00410 | 2 | 33  | 0.007014235 | ENSMUSG00000071708 ENSMUSG00000019326                                      |
| Human Diseases                       | Neurodegenerative diseases       | Prion diseases                           | mmu05020 | 2 | 34  | 0.007409518 | ENSMUSG00000004936 ENSMUSG00000035031                                      |
| Human Diseases                       | Endocrine and metabolic diseases | Insulin resistance                       | mmu04931 | 3 | 111 | 0.008094679 | ENSMUSG00000028944 ENSMUSG00000024900 ENSMUSG0000033083                    |
| Cellular Processes                   | Cell motility                    | Regulation of actin cytoskeleton         | mmu04810 | 4 | 218 | 0.008511253 | ENSMUSG00000004936 ENSMUSG00000020122 ENSMUSG0000019254 ENSMUSG00000026879 |
| Metabolism                           | Global and overview maps         | Carbon metabolism                        | mmu01200 | 3 | 118 | 0.009520465 | ENSMUSG00000061838 ENSMUSG00000021456 ENSMUSG0000027187                    |
| Metabolism                           | Amino acid metabolism            | Glycine, serine and threonine metabolism | mmu00260 | 2 | 41  | 0.010448342 | ENSMUSG00000019326 ENSMUSG00000040147                                      |
| Human Diseases                       | Cancers: Specific types          | Bladder cancer                           | mmu05219 | 2 | 41  | 0.010448342 | ENSMUSG00000004936 ENSMUSG00000020122                                      |
| Environmental Information Processing | Signal transduction              | AMPK signaling pathway                   | mmu04152 | 3 | 129 | 0.012039565 | ENSMUSG00000028944 ENSMUSG00000024900 ENSMUSG0000021456                    |
| Organismal Systems                   | Nervous system                   | Serotonergic synapse                     | mmu04726 | 3 | 133 | 0.013041415 | ENSMUSG00000004936 ENSMUSG00000061740 ENSMUSG0000040147                    |
| Organismal Systems                   | Endocrine system                 | Insulin signaling pathway                | mmu04910 | 3 | 142 | 0.015465233 | ENSMUSG00000004936 ENSMUSG00000028944 ENSMUSG0000021456                    |

|                        |                            |                                                 |          |   |     |             |                                                            |
|------------------------|----------------------------|-------------------------------------------------|----------|---|-----|-------------|------------------------------------------------------------|
| Human Diseases         | Cancers: Specific types    | Endometrial cancer                              | mmu05213 | 2 | 52  | 0.016139381 | ENSMUSG00000004936 ENSMUSG000000020122                     |
| Metabolism             | Amino acid metabolism      | Valine, leucine and isoleucine degradation      | mmu00280 | 2 | 56  | 0.018470895 | ENSMUSG000000027875 ENSMUSG000000059447                    |
| Human Diseases         | Cancers: Specific types    | Non-small cell lung cancer                      | mmu05223 | 2 | 56  | 0.018470895 | ENSMUSG00000004936 ENSMUSG000000020122                     |
| Organismal Systems     | Endocrine system           | Ovarian steroidogenesis                         | mmu04913 | 2 | 58  | 0.019686749 | ENSMUSG000000021226 ENSMUSG000000032315                    |
| Organismal Systems     | Aging                      | Longevity regulating pathway - multiple species | mmu04213 | 2 | 64  | 0.023528382 | ENSMUSG000000028944 ENSMUSG000000027187                    |
| Human Diseases Genetic | Cancers: Specific types    | Glioma                                          | mmu05214 | 2 | 65  | 0.024196276 | ENSMUSG00000004936 ENSMUSG000000020122                     |
| Information Processing | Translation                | RNA transport                                   | mmu03013 | 3 | 170 | 0.024528659 | ENSMUSG00000006005 ENSMUSG000000069049 ENSMUSG000000067194 |
| Human Diseases         | Cancers: Specific types    | Pancreatic cancer                               | mmu05212 | 2 | 66  | 0.024871892 | ENSMUSG00000004936 ENSMUSG000000020122                     |
| Human Diseases         | Infectious diseases: Viral | Influenza A                                     | mmu05164 | 3 | 172 | 0.025264744 | ENSMUSG00000004936 ENSMUSG000000073421 ENSMUSG000000059481 |
| Metabolism             | Carbohydrate metabolism    | Inositol phosphate metabolism                   | mmu00562 | 2 | 70  | 0.027650321 | ENSMUSG000000030682 ENSMUSG000000024525                    |
| Human Diseases         | Cancers: Specific types    | Melanoma                                        | mmu05218 | 2 | 72  | 0.029084244 | ENSMUSG00000004936 ENSMUSG000000020122                     |
| Organismal Systems     | Endocrine system           | Adipocytokine signaling                         | mmu04920 | 2 | 73  | 0.029812167 | ENSMUSG000000028944 ENSMUSG000000024900                    |

|                                      |                                      | pathway                                   |          |   |     |             |                                                             |
|--------------------------------------|--------------------------------------|-------------------------------------------|----------|---|-----|-------------|-------------------------------------------------------------|
| Human Diseases                       | Endocrine and metabolic diseases     | Type I diabetes mellitus                  | mmu04940 | 2 | 77  | 0.032795534 | ENSMUSG000000037852 ENSMUSG000000073421                     |
| Cellular Processes                   | Transport and catabolism             | Phagosome                                 | mmu04145 | 3 | 192 | 0.033273867 | ENSMUSG000000073421 ENSMUSG000000022797 ENSMUSG00000001525  |
| Human Diseases                       | Drug resistance: Antineoplastic      | Platinum drug resistance                  | mmu01524 | 2 | 78  | 0.033558994 | ENSMUSG000000004035 ENSMUSG000000058135                     |
| Organismal Systems                   | Circulatory system                   | Cardiac muscle contraction                | mmu04260 | 2 | 80  | 0.035106644 | ENSMUSG000000061086 ENSMUSG000000053093                     |
| Human Diseases                       | Drug resistance: Antineoplastic      | EGFR tyrosine kinase inhibitor resistance | mmu01521 | 2 | 82  | 0.036681542 | ENSMUSG000000004936 ENSMUSG000000020122                     |
| Cellular Processes                   | Cellular community - eukaryotes      | Focal adhesion                            | mmu04510 | 3 | 203 | 0.038176935 | ENSMUSG000000004936 ENSMUSG000000020122 ENSMUSG000000019254 |
| Human Diseases                       | Cardiovascular diseases              | Hypertrophic cardiomyopathy (HCM)         | mmu05410 | 2 | 84  | 0.038283226 | ENSMUSG000000028944 ENSMUSG000000053093                     |
| Human Diseases                       | Cancers: Overview                    | Proteoglycans in cancer                   | mmu05205 | 3 | 208 | 0.040520881 | ENSMUSG000000004936 ENSMUSG000000020122 ENSMUSG000000019254 |
| Environmental Information Processing | Signal transduction                  | ErbB signaling pathway                    | mmu04012 | 2 | 87  | 0.040734976 | ENSMUSG000000004936 ENSMUSG000000020122                     |
| Organismal Systems                   | Endocrine system                     | GnRH signaling pathway                    | mmu04912 | 2 | 88  | 0.041565127 | ENSMUSG000000004936 ENSMUSG000000020122                     |
| Metabolism                           | Metabolism of cofactors and vitamins | Ubiquinone and other terpenoid-quinone    | mmu00130 | 1 | 11  | 0.042151076 | ENSMUSG000000003849                                         |

|                                      |                                 |                                                            |          |   |     |             |                                         |
|--------------------------------------|---------------------------------|------------------------------------------------------------|----------|---|-----|-------------|-----------------------------------------|
| Metabolism                           | Lipid metabolism                | biosynthesis<br>Synthesis and degradation of ketone bodies | mmu00072 | 1 | 11  | 0.042151076 | ENSMUSG000000027875                     |
| Human Diseases                       | Cancers: Specific types         | Prostate cancer                                            | mmu05215 | 2 | 89  | 0.042401634 | ENSMUSG00000004936 ENSMUSG000000020122  |
| Organismal Systems                   | Immune system                   | Fc gamma R-mediated phagocytosis                           | mmu04666 | 2 | 90  | 0.043244443 | ENSMUSG00000004936 ENSMUSG000000026879  |
| Metabolism                           | Lipid metabolism                | Glycerophospholipid metabolism                             | mmu00564 | 2 | 94  | 0.046677598 | ENSMUSG000000030682 ENSMUSG000000017715 |
| Human Diseases                       | Drug resistance: Antineoplastic | Endocrine resistance                                       | mmu01522 | 2 | 95  | 0.047551094 | ENSMUSG00000004936 ENSMUSG000000020122  |
| Organismal Systems                   | Aging                           | Longevity regulating pathway                               | mmu04211 | 2 | 96  | 0.048430565 | ENSMUSG000000028944 ENSMUSG000000027187 |
| Human Diseases                       | Cardiovascular diseases         | Viral myocarditis                                          | mmu05416 | 2 | 96  | 0.048430565 | ENSMUSG000000073421 ENSMUSG000000053093 |
| Environmental Information Processing | Signal transduction             | Phosphatidylinositol signaling system                      | mmu04070 | 2 | 97  | 0.049315958 | ENSMUSG000000030682 ENSMUSG000000024525 |
| Organismal Systems                   | Immune system                   | Antigen processing and presentation                        | mmu04612 | 2 | 98  | 0.050207221 | ENSMUSG000000073421 ENSMUSG000000024308 |
| Organismal Systems                   | Endocrine system                | Estrogen signaling pathway                                 | mmu04915 | 2 | 98  | 0.050207221 | ENSMUSG00000004936 ENSMUSG000000020122  |
| Human Diseases                       | Cancers: Overview               | Choline metabolism in cancer                               | mmu05231 | 2 | 101 | 0.052915695 | ENSMUSG00000004936 ENSMUSG000000020122  |

|                    |                                          |                                         |           |   |     |             |                                         |
|--------------------|------------------------------------------|-----------------------------------------|-----------|---|-----|-------------|-----------------------------------------|
| Organismal Systems | Endocrine system                         | Glucagon signaling pathway              | mmu04922  | 2 | 102 | 0.053829909 | ENSMUSG000000028944 ENSMUSG000000024900 |
| Metabolism         | Lipid metabolism                         | Primary bile acid biosynthesis          | mmu00120  | 1 | 16  | 0.059188981 | ENSMUSG000000028603                     |
| Metabolism         | Metabolism of other amino acids          | Selenocompound metabolism               | mmu00450  | 1 | 17  | 0.062560281 | ENSMUSG000000003477                     |
| Human Diseases     | Infectious diseases: Parasitic           | Toxoplasmosis                           | mmu005145 | 2 | 113 | 0.064245281 | ENSMUSG000000073421 ENSMUSG000000046879 |
| Organismal Systems | Endocrine system                         | Thyroid hormone signaling pathway       | mmu004919 | 2 | 117 | 0.068187943 | ENSMUSG000000004936 ENSMUSG000000033083 |
| Metabolism         | Metabolism of cofactors and vitamins     | One carbon pool by folate               | mmu00670  | 1 | 19  | 0.069266941 | ENSMUSG000000021048                     |
| Cellular Processes | Transport and catabolism                 | Lysosome                                | mmu004142 | 2 | 124 | 0.075273294 | ENSMUSG000000004207 ENSMUSG000000030894 |
| Organismal Systems | Excretory system                         | Proximal tubule bicarbonate reclamation | mmu004964 | 1 | 22  | 0.079237715 | ENSMUSG000000000805                     |
| Metabolism         | Metabolism of terpenoids and polyketides | Terpenoid backbone biosynthesis         | mmu00900  | 1 | 24  | 0.085825909 | ENSMUSG000000027875                     |
| Organismal Systems | Nervous system                           | Dopaminergic synapse                    | mmu004728 | 2 | 135 | 0.086851681 | ENSMUSG000000040147 ENSMUSG000000000326 |
| Metabolism         | Lipid                                    | alpha-Linolenic                         | mmu0      | 1 | 25  | 0.0891024   | ENSMUSG000000020777                     |

|                                      |                                  |                                         |          |   |     |             |                                       |
|--------------------------------------|----------------------------------|-----------------------------------------|----------|---|-----|-------------|---------------------------------------|
|                                      | metabolism                       | acid metabolism                         | 0592     |   |     | 34          |                                       |
| Human Diseases                       | Immune diseases                  | Asthma                                  | mmu05310 | 1 | 26  | 0.0923673   | ENSMUSG00000073421                    |
| Metabolism                           | Amino acid metabolism            | Histidine metabolism                    | mmu00340 | 1 | 26  | 0.0923673   | ENSMUSG00000040147                    |
| Cellular Processes                   | Cellular community - eukaryotes  | Tight junction                          | mmu04530 | 2 | 141 | 0.093378096 | ENSMUSG00000018830 ENSMUSG00000053093 |
| Metabolism                           | Carbohydrate metabolism          | Butanoate metabolism                    | mmu00650 | 1 | 27  | 0.095620548 | ENSMUSG00000027875                    |
| Environmental Information Processing | Signal transduction              | Phospholipase D signaling pathway       | mmu04072 | 2 | 146 | 0.098922017 | ENSMUSG00000004936 ENSMUSG00000020122 |
| Metabolism                           | Carbohydrate metabolism          | Glyoxylate and dicarboxylate metabolism | mmu00630 | 1 | 30  | 0.105310991 | ENSMUSG00000027187                    |
| Organismal Systems                   | Circulatory system               | Adrenergic signaling in cardiomyocytes  | mmu04261 | 2 | 152 | 0.105693452 | ENSMUSG00000061086 ENSMUSG00000053093 |
| Metabolism                           | Carbohydrate metabolism          | Pentose phosphate pathway               | mmu00030 | 1 | 31  | 0.108518176 | ENSMUSG00000021456                    |
| Organismal Systems                   | Environmental adaptation         | Circadian rhythm                        | mmu04710 | 1 | 31  | 0.108518176 | ENSMUSG00000028944                    |
| Metabolism                           | Carbohydrate metabolism          | Propanoate metabolism                   | mmu00640 | 1 | 31  | 0.108518176 | ENSMUSG00000061838                    |
| Genetic Information Processing       | Folding, sorting and degradation | Protein export                          | mmu03060 | 1 | 31  | 0.108518176 | ENSMUSG00000000959                    |

|                                      |                                  |                                              |          |   |     |             |                                                           |
|--------------------------------------|----------------------------------|----------------------------------------------|----------|---|-----|-------------|-----------------------------------------------------------|
| Metabolism                           | Carbohydrate metabolism          | Citrate cycle (TCA cycle)                    | mmu00020 | 1 | 32  | 0.111713945 | ENSMUSG000000061838                                       |
| Metabolism                           | Carbohydrate metabolism          | Fructose and mannose metabolism              | mmu00051 | 1 | 35  | 0.121233171 | ENSMUSG000000021456                                       |
| Environmental Information Processing | Signal transduction              | cGMP-PKG signaling pathway                   | mmu04022 | 2 | 173 | 0.130297889 | ENSMUSG00000004936 ENSMUSG000000053093                    |
| Environmental Information Processing | Signal transduction              | PI3K-Akt signaling pathway                   | mmu04151 | 3 | 350 | 0.133701313 | ENSMUSG00000004936 ENSMUSG000000020122 ENSMUSG00000057672 |
| Organismal Systems                   | Immune system                    | Intestinal immune network for IgA production | mmu04672 | 1 | 44  | 0.149187403 | ENSMUSG000000073421                                       |
| Genetic Information Processing       | Folding, sorting and degradation | Proteasome                                   | mmu03050 | 1 | 45  | 0.152238405 | ENSMUSG000000005625                                       |
| Environmental Information Processing | Signal transduction              | cAMP signaling pathway                       | mmu04024 | 2 | 198 | 0.161073204 | ENSMUSG00000004936 ENSMUSG000000020777                    |
| Human Diseases                       | Substance dependence             | Cocaine addiction                            | mmu05030 | 1 | 49  | 0.164334174 | ENSMUSG000000040147                                       |
| Metabolism                           | Amino acid metabolism            | Cysteine and methionine metabolism           | mmu00270 | 1 | 49  | 0.164334174 | ENSMUSG000000071708                                       |
| Human Diseases                       | Neurodegenerative diseases       | Amyotrophic lateral sclerosis (ALS)          | mmu05014 | 1 | 52  | 0.173293414 | ENSMUSG000000027187                                       |
| Human Diseases                       | Cancers: Overview                | Pathways in cancer                           | mmu05200 | 3 | 398 | 0.174367982 | ENSMUSG00000004936 ENSMUSG000000020122 ENSMUSG0000006005  |



|                                      |                                |                                       |          |   |     |             |                                       |
|--------------------------------------|--------------------------------|---------------------------------------|----------|---|-----|-------------|---------------------------------------|
| Environmental Information Processing | Signal transduction            | Rap1 signaling pathway                | mmu04015 | 2 | 215 | 0.182684884 | ENSMUSG00000004936 ENSMUSG00000020122 |
| Human Diseases                       | Cancers: Specific types        | Acute myeloid leukemia                | mmu05221 | 1 | 57  | 0.188014049 | ENSMUSG00000004936                    |
| Organismal Systems                   | Endocrine system               | Regulation of lipolysis in adipocytes | mmu04923 | 1 | 57  | 0.188014049 | ENSMUSG00000062515                    |
| Human Diseases                       | Immune diseases                | Inflammatory bowel disease (IBD)      | mmu05321 | 1 | 59  | 0.19382917  | ENSMUSG00000073421                    |
| Environmental Information Processing | Signal transduction            | VEGF signaling pathway                | mmu04370 | 1 | 60  | 0.196721207 | ENSMUSG00000004936                    |
| Organismal Systems                   | Nervous system                 | Long-term depression                  | mmu04730 | 1 | 61  | 0.199602943 | ENSMUSG00000004936                    |
| Environmental Information Processing | Signal transduction            | Ras signaling pathway                 | mmu04014 | 2 | 231 | 0.203388786 | ENSMUSG00000004936 ENSMUSG00000020122 |
| Human Diseases                       | Cancers: Specific types        | Colorectal cancer                     | mmu05210 | 1 | 64  | 0.208186713 | ENSMUSG00000004936                    |
| Organismal Systems                   | Nervous system                 | Long-term potentiation                | mmu04720 | 1 | 66  | 0.213858388 | ENSMUSG00000004936                    |
| Metabolism                           | Carbohydrate metabolism        | Glycolysis / Gluconeogenesis          | mmu00010 | 1 | 66  | 0.213858388 | ENSMUSG00000021456                    |
| Human Diseases                       | Infectious diseases: Parasitic | Leishmaniasis                         | mmu05140 | 1 | 67  | 0.216679082 | ENSMUSG00000073421                    |
| Human Diseases                       | Substance dependence           | Amphetamine addiction                 | mmu05031 | 1 | 68  | 0.219489728 | ENSMUSG00000040147                    |

|                                      |                                 |                                   |          |   |     |             |                                       |
|--------------------------------------|---------------------------------|-----------------------------------|----------|---|-----|-------------|---------------------------------------|
| Human Diseases                       | Cancers: Specific types         | Renal cell carcinoma              | mmu05211 | 1 | 68  | 0.219489728 | ENSMUSG00000004936                    |
| Organismal Systems                   | Immune system                   | Fc epsilon RI signaling pathway   | mmu04664 | 1 | 69  | 0.222290361 | ENSMUSG00000004936                    |
| Human Diseases                       | Immune diseases                 | Allograft rejection               | mmu05330 | 1 | 72  | 0.230632538 | ENSMUSG00000073421                    |
| Human Diseases                       | Immune diseases                 | Graft-versus-host disease         | mmu05332 | 1 | 72  | 0.230632538 | ENSMUSG00000073421                    |
| Human Diseases                       | Cancers: Specific types         | Chronic myeloid leukemia          | mmu05220 | 1 | 73  | 0.233393474 | ENSMUSG00000004936                    |
| Environmental Information Processing | Signal transduction             | MAPK signaling pathway            | mmu04010 | 2 | 254 | 0.233562624 | ENSMUSG00000004936 ENSMUSG00000020122 |
| Organismal Systems                   | Endocrine system                | Prolactin signaling pathway       | mmu04917 | 1 | 74  | 0.236144572 | ENSMUSG00000004936                    |
| Cellular Processes                   | Cellular community - eukaryotes | Adherens junction                 | mmu04520 | 1 | 74  | 0.236144572 | ENSMUSG00000020122                    |
| Organismal Systems                   | Immune system                   | B cell receptor signaling pathway | mmu04662 | 1 | 75  | 0.238885869 | ENSMUSG00000004936                    |
| Organismal Systems                   | Digestive system                | Salivary secretion                | mmu04970 | 1 | 78  | 0.247051293 | ENSMUSG00000027447                    |
| Human Diseases                       | Infectious diseases: Bacterial  | Salmonella infection              | mmu05132 | 1 | 78  | 0.247051293 | ENSMUSG00000057672                    |
| Human Diseases                       | Immune diseases                 | Rheumatoid arthritis              | mmu05323 | 1 | 85  | 0.265767293 | ENSMUSG00000073421                    |

|                    |                                      |                                         |          |   |     |             |                                       |
|--------------------|--------------------------------------|-----------------------------------------|----------|---|-----|-------------|---------------------------------------|
| Human Diseases     | Cancers: Overview                    | MicroRNAs in cancer                     | mmu05206 | 2 | 281 | 0.269285847 | ENSMUSG00000004936 ENSMUSG00000020122 |
| Organismal Systems | Immune system                        | Hematopoietic cell lineage              | mmu04640 | 1 | 87  | 0.271029372 | ENSMUSG00000022797                    |
| Human Diseases     | Immune diseases                      | Autoimmune thyroid disease              | mmu05320 | 1 | 87  | 0.271029372 | ENSMUSG00000073421                    |
| Metabolism         | Metabolism of cofactors and vitamins | Retinol metabolism                      | mmu00830 | 1 | 89  | 0.276254008 | ENSMUSG00000032315                    |
| Metabolism         | Lipid metabolism                     | Arachidonic acid metabolism             | mmu00590 | 1 | 90  | 0.278852368 | ENSMUSG00000022040                    |
| Human Diseases     | Cardiovascular diseases              | Dilated cardiomyopathy                  | mmu05414 | 1 | 90  | 0.278852368 | ENSMUSG00000053093                    |
| Organismal Systems | Endocrine system                     | Progesterone-mediated oocyte maturation | mmu04914 | 1 | 90  | 0.278852368 | ENSMUSG00000004936                    |
| Cellular Processes | Transport and catabolism             | Endocytosis                             | mmu04144 | 2 | 294 | 0.286499814 | ENSMUSG00000020122 ENSMUSG00000022797 |
| Organismal Systems | Endocrine system                     | Melanogenesis                           | mmu04916 | 1 | 99  | 0.30182474  | ENSMUSG00000004936                    |
| Organismal Systems | Immune system                        | Toll-like receptor signaling pathway    | mmu04620 | 1 | 101 | 0.30683021  | ENSMUSG00000004936                    |
| Organismal Systems | Immune system                        | T cell receptor signaling pathway       | mmu04660 | 1 | 105 | 0.316734512 | ENSMUSG00000004936                    |

|                                      |                                 |                                                          |          |   |     |             |                    |
|--------------------------------------|---------------------------------|----------------------------------------------------------|----------|---|-----|-------------|--------------------|
| Human Diseases                       | Infectious diseases: Parasitic  | Amoebiasis                                               | mmu05146 | 1 | 111 | 0.331328123 | ENSMUSG00000035031 |
| Environmental Information Processing | Signal transduction             | TNF signaling pathway                                    | mmu04668 | 1 | 112 | 0.333730123 | ENSMUSG00000004936 |
| Organismal Systems                   | Nervous system                  | Cholinergic synapse                                      | mmu04725 | 1 | 113 | 0.336123557 | ENSMUSG00000004936 |
| Cellular Processes                   | Cell growth and death           | Oocyte meiosis                                           | mmu04114 | 1 | 116 | 0.34325276  | ENSMUSG00000004936 |
| Organismal Systems                   | Immune system                   | Natural killer cell mediated cytotoxicity                | mmu04650 | 1 | 121 | 0.354966244 | ENSMUSG00000004936 |
| Organismal Systems                   | Nervous system                  | Neurotrophin signaling pathway                           | mmu04722 | 1 | 122 | 0.35728393  | ENSMUSG00000004936 |
| Environmental Information Processing | Signal transduction             | Sphingolipid signaling pathway                           | mmu04071 | 1 | 125 | 0.364187498 | ENSMUSG00000004936 |
| Organismal Systems                   | Development                     | Osteoclast differentiation                               | mmu04380 | 1 | 133 | 0.38223918  | ENSMUSG00000004936 |
| Human Diseases                       | Infectious diseases: Viral      | Hepatitis C                                              | mmu05160 | 1 | 137 | 0.391073272 | ENSMUSG00000020122 |
| Cellular Processes                   | Cell growth and death           | Apoptosis                                                | mmu04210 | 1 | 139 | 0.395443169 | ENSMUSG00000004936 |
| Cellular Processes                   | Cellular community - eukaryotes | Signaling pathways regulating pluripotency of stem cells | mmu04550 | 1 | 140 | 0.397616428 | ENSMUSG00000004936 |
| Human                                | Infectious                      | Hepatitis B                                              | mmu0     | 1 | 146 | 0.4104940   | ENSMUSG00000004936 |

|               |                  |                 |      |   |     |           |                    |
|---------------|------------------|-----------------|------|---|-----|-----------|--------------------|
| Diseases      | diseases: Viral  |                 | 5161 |   |     | 55        |                    |
| Human         | Neurodegenera    | Parkinson's     | mmu0 | 1 | 149 | 0.4168299 | ENSMUSG00000029223 |
| Diseases      | tive diseases    | disease         | 5012 |   |     | 96        |                    |
| Environmental |                  | mTOR            | mmu0 |   |     | 0.4313521 |                    |
| Information   | Signal           | signaling       | 4150 | 1 | 156 | 57        | ENSMUSG00000004936 |
| Processing    | transduction     | pathway         |      |   |     |           |                    |
|               |                  | Non-alcoholic   |      |   |     |           |                    |
| Human         | Endocrine and    | fatty liver     | mmu0 | 1 | 157 | 0.4333972 | ENSMUSG00000028944 |
| Diseases      | metabolic        | disease         | 4932 |   |     | 29        |                    |
|               | diseases         | (NAFLD)         |      |   |     |           |                    |
|               |                  | Protein         |      |   |     |           |                    |
| Genetic       | Folding, sorting | processing in   | mmu0 | 1 | 167 | 0.4534505 | ENSMUSG00000039474 |
| Information   | and              | endoplasmic     | 4141 |   |     | 77        |                    |
| Processing    | degradation      | reticulum       |      |   |     |           |                    |
| Environmental | Signaling        | Cell adhesion   | mmu0 | 1 | 176 | 0.4708952 | ENSMUSG00000073421 |
| Information   | molecules and    | molecules       | 4514 |   |     | 73        |                    |
| Processing    | interaction      | (CAMs)          |      |   |     |           |                    |
|               | Infectious       |                 |      |   |     |           |                    |
| Human         | diseases:        | Tuberculosis    | mmu0 | 1 | 179 | 0.4765864 | ENSMUSG00000073421 |
| Diseases      | Bacterial        |                 | 5152 |   |     | 3         |                    |
| Environmental |                  |                 |      |   |     |           |                    |
| Information   | Signal           | Calcium         | mmu0 | 1 | 182 | 0.4822168 | ENSMUSG00000020122 |
| Processing    | transduction     | signaling       | 4020 |   |     | 07        |                    |
|               |                  | pathway         |      |   |     |           |                    |
| Organismal    |                  | Chemokine       | mmu0 | 1 | 198 | 0.5112452 | ENSMUSG00000004936 |
| Systems       | Immune system    | signaling       | 4062 |   |     | 92        |                    |
|               |                  | pathway         |      |   |     |           |                    |
|               |                  | Herpes          |      |   |     |           |                    |
| Human         | Infectious       | simplex         | mmu0 | 1 | 224 | 0.5550090 | ENSMUSG00000073421 |
| Diseases      | diseases: Viral  | infection       | 5168 |   |     | 88        |                    |
|               |                  |                 |      |   |     |           |                    |
| Human         | Infectious       | Epstein-Barr    | mmu0 | 1 | 232 | 0.5676750 | ENSMUSG00000005625 |
| Diseases      | diseases: Viral  | virus infection | 5169 |   |     | 69        |                    |

|                                      |                                     |                                         |          |   |     |             |                    |
|--------------------------------------|-------------------------------------|-----------------------------------------|----------|---|-----|-------------|--------------------|
| Human Diseases                       | Cancers: Overview                   | Viral carcinogenesis                    | mmu05203 | 1 | 245 | 0.587498222 | ENSMUSG00000026879 |
| Environmental Information Processing | Signaling molecules and interaction | Cytokine-cytokine receptor interaction  | mmu04060 | 1 | 265 | 0.616247095 | ENSMUSG00000020122 |
| Environmental Information Processing | Signaling molecules and interaction | Neuroactive ligand-receptor interaction | mmu04080 | 1 | 285 | 0.643005757 | ENSMUSG00000059481 |
| Human Diseases                       | Infectious diseases: Viral          | HTLV-I infection                        | mmu05166 | 1 | 295 | 0.655681896 | ENSMUSG00000073421 |

---

**Table SIX. The DEPs in the metabolic related pathways of DbCM / CK.**

| class_A    | class_B                              | Term                                                | ID       | Input number | Background number | P_Value     | Input               |
|------------|--------------------------------------|-----------------------------------------------------|----------|--------------|-------------------|-------------|---------------------|
| Metabolism | Metabolism of other amino acids      | Selenocompound metabolism                           | mmu00450 | 1            | 17                | 0.062560281 | ENSMUSG00000003477  |
| Metabolism | Metabolism of cofactors and vitamins | Ubiquinone and other terpenoid-quinone biosynthesis | mmu00130 | 1            | 11                | 0.042151076 | ENSMUSG00000003849  |
| Metabolism | Lipid metabolism                     | alpha-Linolenic acid metabolism                     | mmu00592 | 1            | 25                | 0.089102434 | ENSMUSG000000020777 |
| Metabolism | Metabolism of cofactors and vitamins | One carbon pool by folate                           | mmu00670 | 1            | 19                | 0.069266941 | ENSMUSG000000021048 |
| Metabolism | Carbohydrate metabolism              | Pentose phosphate pathway                           | mmu00030 | 1            | 31                | 0.108518176 | ENSMUSG000000021456 |
| Metabolism | Carbohydrate metabolism              | Fructose and mannose metabolism                     | mmu00051 | 1            | 35                | 0.121233171 | ENSMUSG000000021456 |
| Metabolism | Carbohydrate metabolism              | Glycolysis / Gluconeogenesis                        | mmu00010 | 1            | 66                | 0.213858388 | ENSMUSG000000021456 |
| Metabolism | Lipid metabolism                     | Arachidonic acid metabolism                         | mmu00590 | 1            | 90                | 0.278852368 | ENSMUSG000000022040 |
| Metabolism | Carbohydrate metabolism              | Glyoxylate and dicarboxylate metabolism             | mmu00630 | 1            | 30                | 0.105310991 | ENSMUSG000000027187 |
| Metabolism | Carbohydrate metabolism              | Butanoate metabolism                                | mmu00650 | 1            | 27                | 0.095620548 | ENSMUSG000000027875 |
| Metabolism | Lipid metabolism                     | Synthesis and degradation of ketone bodies          | mmu00072 | 1            | 11                | 0.042151076 | ENSMUSG000000027875 |

|            |                                          |                                            |          |   |    |             |                                       |
|------------|------------------------------------------|--------------------------------------------|----------|---|----|-------------|---------------------------------------|
| Metabolism | Metabolism of terpenoids and polyketides | Terpenoid backbone biosynthesis            | mmu00900 | 1 | 24 | 0.085825909 | ENSMUSG00000027875                    |
| Metabolism | Lipid metabolism                         | Primary bile acid biosynthesis             | mmu00120 | 1 | 16 | 0.059188981 | ENSMUSG00000028603                    |
| Metabolism | Metabolism of cofactors and vitamins     | Retinol metabolism                         | mmu00830 | 1 | 89 | 0.276254008 | ENSMUSG00000032315                    |
| Metabolism | Amino acid metabolism                    | Histidine metabolism                       | mmu00340 | 1 | 26 | 0.0923673   | ENSMUSG00000040147                    |
| Metabolism | Carbohydrate metabolism                  | Propanoate metabolism                      | mmu00640 | 1 | 31 | 0.108518176 | ENSMUSG00000061838                    |
| Metabolism | Carbohydrate metabolism                  | Citrate cycle (TCA cycle)                  | mmu00020 | 1 | 32 | 0.111713945 | ENSMUSG00000061838                    |
| Metabolism | Amino acid metabolism                    | Cysteine and methionine metabolism         | mmu00270 | 1 | 49 | 0.164334174 | ENSMUSG00000071708                    |
| Metabolism | Amino acid metabolism                    | Phenylalanine metabolism                   | mmu00360 | 2 | 24 | 0.00391278  | ENSMUSG00000019326 ENSMUSG00000040147 |
| Metabolism | Amino acid metabolism                    | Glycine, serine and threonine metabolism   | mmu00260 | 2 | 41 | 0.010448342 | ENSMUSG00000019326 ENSMUSG00000040147 |
| Metabolism | Energy metabolism                        | Nitrogen metabolism                        | mmu00910 | 2 | 17 | 0.002092773 | ENSMUSG00000027559 ENSMUSG0000000805  |
| Metabolism | Amino acid metabolism                    | Valine, leucine and isoleucine degradation | mmu00280 | 2 | 56 | 0.018470895 | ENSMUSG00000027875 ENSMUSG00000059447 |
| Metabolism | Lipid metabolism                         | Glycerophospholipid metabolism             | mmu00564 | 2 | 94 | 0.046677598 | ENSMUSG00000030682 ENSMUSG00000017715 |
| Metabolism | Carbohydrate metabolism                  | Inositol phosphate metabolism              | mmu00562 | 2 | 70 | 0.027650321 | ENSMUSG00000030682 ENSMUSG00000024525 |
| Metabolism | Metabolism of other amino acids          | beta-Alanine metabolism                    | mmu00410 | 2 | 33 | 0.007014235 | ENSMUSG00000071708 ENSMUSG00000019326 |



|            |                                                 |                                                    |          |   |     |             |                                                                                     |
|------------|-------------------------------------------------|----------------------------------------------------|----------|---|-----|-------------|-------------------------------------------------------------------------------------|
| Metabolism | Xenobiotics<br>biodegradation and<br>metabolism | Drug metabolism -<br>cytochrome P450               | mmu00982 | 3 | 67  | 0.002065546 | ENSMUSG00000004035 ENSMUSG000<br>00040147 ENSMUSG000000058135                       |
| Metabolism | Amino acid<br>metabolism                        | Tyrosine metabolism                                | mmu00350 | 3 | 40  | 0.000499671 | ENSMUSG00000019326 ENSMUSG000<br>00040147 ENSMUSG00000000326                        |
| Metabolism | Lipid metabolism                                | Biosynthesis of<br>unsaturated fatty acids         | mmu01040 | 3 | 28  | 0.000187806 | ENSMUSG00000021226 ENSMUSG000<br>00072949 ENSMUSG00000020777                        |
| Metabolism | Lipid metabolism                                | Fatty acid elongation                              | mmu00062 | 3 | 27  | 0.000170076 | ENSMUSG00000021226 ENSMUSG000<br>00072949 ENSMUSG00000059447                        |
| Metabolism | Global and<br>overview maps                     | Fatty acid metabolism                              | mmu01212 | 3 | 52  | 0.00102943  | ENSMUSG00000024900 ENSMUSG000<br>00020777 ENSMUSG00000059447                        |
| Metabolism | Lipid metabolism                                | Fatty acid degradation                             | mmu00071 | 3 | 49  | 0.000873997 | ENSMUSG00000024900 ENSMUSG000<br>00020777 ENSMUSG00000059447                        |
| Metabolism | Xenobiotics<br>biodegradation and<br>metabolism | Metabolism of<br>xenobiotics by<br>cytochrome P450 | mmu00980 | 3 | 65  | 0.001900942 | ENSMUSG00000058135 ENSMUSG000<br>00004035 ENSMUSG00000032315                        |
| Metabolism | Lipid metabolism                                | Steroid hormone<br>biosynthesis                    | mmu00140 | 3 | 87  | 0.00420835  | ENSMUSG00000061740 ENSMUSG000<br>00032315 ENSMUSG00000000326                        |
| Metabolism | Global and<br>overview maps                     | Carbon metabolism                                  | mmu01200 | 3 | 118 | 0.009520465 | ENSMUSG00000061838 ENSMUSG000<br>00021456 ENSMUSG00000027187                        |
| Metabolism | Amino acid<br>metabolism                        | Tryptophan<br>metabolism                           | mmu00380 | 4 | 47  | 3.46E-05    | ENSMUSG00000032315 ENSMUSG000<br>00040147 ENSMUSG00000003477 EN<br>SMUSG00000027187 |
| Metabolism | Metabolism of<br>other amino acids              | Glutathione<br>metabolism                          | mmu00480 | 4 | 57  | 7.02E-05    | ENSMUSG00000071708 ENSMUSG000<br>00004035 ENSMUSG00000058135 EN<br>SMUSG00000039682 |
| Metabolism | Amino acid<br>metabolism                        | Arginine and proline<br>metabolism                 | mmu00330 | 4 | 51  | 4.66E-05    | ENSMUSG00000071708 ENSMUSG000<br>00040147 ENSMUSG00000039682 EN<br>SMUSG00000003526 |
