# Supplementary figures and images for: Transcriptomics Coupled to Proteomics Reveals Novel Targets for the Protective Role of Spermine in Diabetic Cardiomyopathy
Source: Hindawi journal article supplement (doi:10.1155/2022/5909378), 2022-01-01

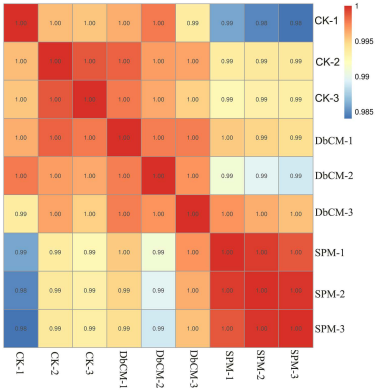

Supplement: f1 [file 5909378.f1.zip]

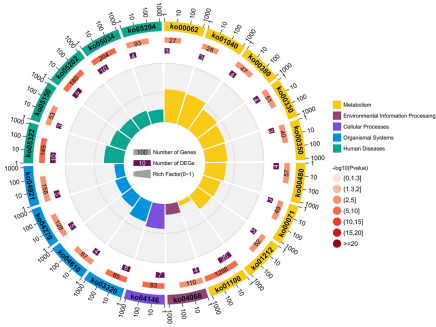

Supplement: f1 [file 5909378.f1.zip]

A

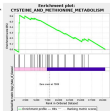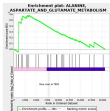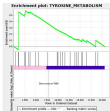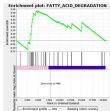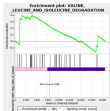

B

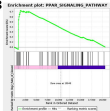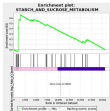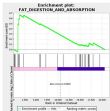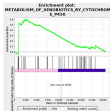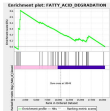

Supplement: f1 [file 5909378.f1.zip]

A

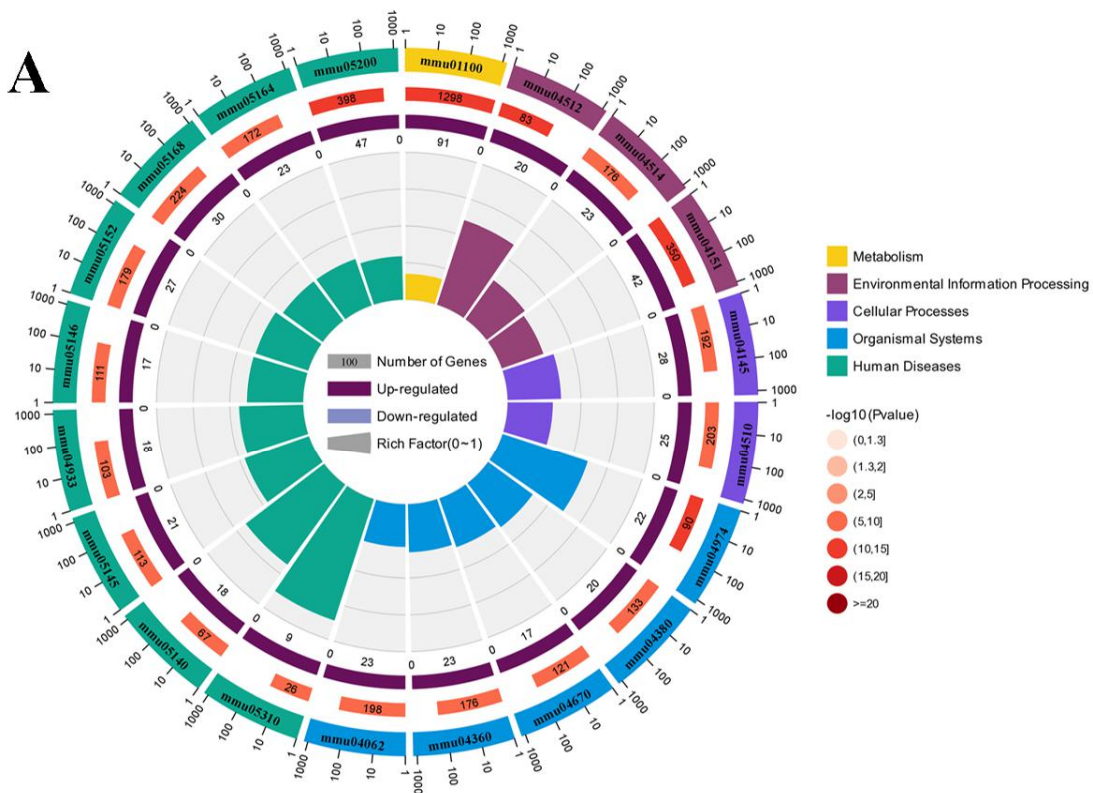

B

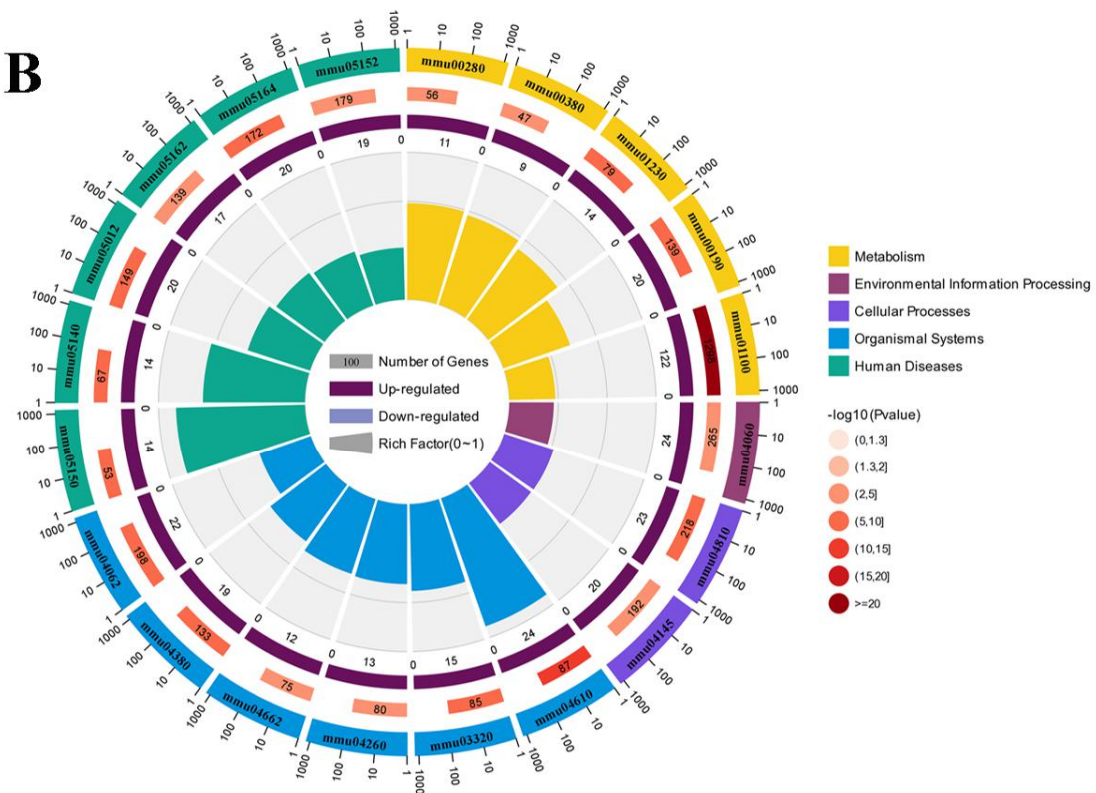

Supplement: f1 [file 5909378.f1.zip]
